# Supplementary material for: Structural diversity of anti-pancreatic cancer capsimycins identified in mangrove-derived Streptomyces xiamenensis 318 and post-modification via a novel cytochrome P450 monooxygenase
Source: PubMed Central journal article supplement (PMC5241641; doi:10.1038/srep40689), 2017-01-18

**Structural diversity of anti-pancreatic cancer capsimycins identified in mangrove-derived *Streptomyces xiamenensis* 318 and post-modification via a novel cytochrome P450 monooxygenase**

He-Lin YU<sup>1</sup>, Shu-Heng Jiang<sup>2</sup>, Xu-Liang BU<sup>3</sup>, Jia-Hua WANG<sup>3</sup>, Jing-Yi Weng<sup>1</sup>, Xiao-Mei Yang<sup>2</sup>, Kun-Yan He<sup>1</sup>, Zhi-Gang Zhang<sup>2</sup>, Ping AO<sup>1</sup>, Jun Xu<sup>3\*</sup> and Min-Juan XU<sup>1\*</sup>

<sup>1</sup> Ministry of Education Key Laboratory of Systems Biomedicine, Shanghai Centre for Systems Biomedicine, Shanghai Jiao Tong University, Shanghai 200240, China

<sup>2</sup> State Key Laboratory of Oncogenes and Related Genes, Shanghai Cancer Institute, Ren Ji Hospital, Shanghai Jiao Tong University School of Medicine, Shanghai 200240, China

<sup>3</sup> State Key Laboratory of Microbial Metabolism and School of Life Sciences and Biotechnology, Institute of Oceanology, Shanghai Jiao Tong University, Shanghai 200240, China

\*Correspondence and requests for materials should be addressed to J. X. (xujunn@sjtu.edu.cn), M. X. (minjuanxu@sjtu.edu.cn)

**Subject areas:** *Streptomyces xiamenensis*, capsimycin, P450 monooxygenase, anti-pancreatic cancer

## Supplementary materials

|                                                                                                                                                                             |    |
|-----------------------------------------------------------------------------------------------------------------------------------------------------------------------------|----|
| Figure S1. Coomassie blue stained SDS-PAGE gel analysis of IkaD.....                                                                                                        | 8  |
| Figure S2. Alignment of IkaD to some macrolide P450 monooxygenases. ....                                                                                                    | 8  |
| Figure S3. Maximum-likelihood phylogenetic tree of the novel cytochrome P450 monooxygenase IkaD (full dendrogram).....                                                      | 9  |
| Table S1. Summary of the P450 monooxygenases (Sxim_40690) BlastP analysis.....                                                                                              | 11 |
| Figure S4. HPLC (A) and UPLC (B) profiles of ikarugamycin (1) conversions into capsimycin (3) and 3' catalyzed by IkaD <i>in vitro</i> . ....                               | 12 |
| Figure S5. HPLC analysis of the changes of capsimycin (2), capsimycin B (3), and ikarugamycin (1) in methanol solution (contained 1% TFA) at 45 °C with different time..... | 13 |
| Figure S6. Analysis of capsimycin (2) and capsimycin B (3) acidification. ....                                                                                              | 14 |
| Figure S7. Proposed three fragmentation patterns (A-C) of compound 1-7 in secondary mass spectrometry. ....                                                                 | 14 |
| Table S2. Fragment ions of compounds 1-7 in the positive mode.....                                                                                                          | 15 |
| Figure S8. ESI-HR-MS/MS of 1.....                                                                                                                                           | 18 |
| Figure S9. ESI-HR-MS/MS of 2.....                                                                                                                                           | 18 |
| Figure S10. ESI-HR-MS/MS of 3.....                                                                                                                                          | 19 |
| Figure S11. ESI-HR-MS/MS of 4.....                                                                                                                                          | 19 |
| Figure S12. ESI-HR-MS/MS of 5.....                                                                                                                                          | 20 |

|                                                                                                          |    |
|----------------------------------------------------------------------------------------------------------|----|
| Figure S13. ESI-HR-MS/MS of 6.....                                                                       | 20 |
| Figure S14. ESI-HR-MS/MS of 7.....                                                                       | 21 |
| Figure S15. ESI-HR-MS/MS of 3'.....                                                                      | 21 |
| Figure S16. UV spectra of compounds 1-7.....                                                             | 22 |
| Table S3. $^1\text{H}$ (600 MHz) and $^{13}\text{C}$ (150 MHz) spectroscopic data of capsimycin (2)..... | 23 |
| Figure S17. HRESIMS of capsimycin (2) (Positive mode).....                                               | 24 |
| Figure S18. $^1\text{H}$ NMR (600 MHz, $\text{CDCl}_3$ ) spectrum of capsimycin (2). .....               | 24 |
| Figure S19. $^{13}\text{C}$ NMR (600 MHz, $\text{CDCl}_3$ ) spectrum of capsimycin (2). .....            | 25 |
| Figure S20. DEPT 135 (600 MHz, $\text{CDCl}_3$ ) spectrum of capsimycin (2). .....                       | 25 |
| Figure S21. HSQC (600 MHz, $\text{CDCl}_3$ ) of capsimycin (2). .....                                    | 26 |
| Figure S22. HMBC (600 MHz, $\text{CDCl}_3$ ) of capsimycin (2). .....                                    | 26 |
| Figure S23. COSY (600 MHz, $\text{CDCl}_3$ ) of capsimycin (2). .....                                    | 27 |
| Figure S24-a. NOESY (600 MHz, $\text{CDCl}_3$ ) of capsimycin (2).....                                   | 27 |
| Figure S24-b. ROESY (600 MHz, $\text{CDCl}_3$ ) of capsimycin (2).....                                   | 28 |
| Figure S25. HRESIMS of 3 (Positive mode).....                                                            | 28 |
| Table S4. $^1\text{H}$ (600 MHz) and $^{13}\text{C}$ (150 MHz) spectroscopic data of 3. ....             | 29 |
| Figure S26. $^1\text{H}$ NMR (600 MHz, $\text{CDCl}_3$ ) spectrum of 3.....                              | 30 |
| Figure S27. $^{13}\text{C}$ NMR (600 MHz, $\text{CDCl}_3$ ) spectrum of 3.....                           | 30 |
| Figure S28. $^{13}\text{C}$ -DEPT 135 (600 MHz, $\text{CDCl}_3$ ) spectrum of 3.....                     | 31 |
| Figure S29. HSQC (600 MHz, $\text{CDCl}_3$ ) of 3. ....                                                  | 31 |

|                                                                                                |    |
|------------------------------------------------------------------------------------------------|----|
| Figure S30. HMBC (600 MHz, CDCl <sub>3</sub> ) of 3. ....                                      | 32 |
| Figure S31. COSY (600 MHz, CDCl <sub>3</sub> ) of 3. ....                                      | 32 |
| Figure S32. NOESY (600 MHz, CDCl <sub>3</sub> ) of 3. ....                                     | 33 |
| Figure S33. HRESIMS of 4 (Positive mode). ....                                                 | 33 |
| Table S5. <sup>1</sup> H (600 MHz) and <sup>13</sup> C (150 MHz) spectroscopic data of 4. .... | 34 |
| Figure S34. <sup>1</sup> H NMR (600 MHz, MeOD/CDCl <sub>3</sub> ) spectrum of 4. ....          | 35 |
| Figure S35. <sup>13</sup> C NMR (600 MHz, MeOD/CDCl <sub>3</sub> ) spectrum of 4. ....         | 35 |
| Figure S36. <sup>13</sup> C-DEPT NMR (600 MHz, MeOD/CDCl <sub>3</sub> ) spectrum of 4. ....    | 36 |
| Figure S37. HSQC (600 MHz, MeOD/CDCl <sub>3</sub> ) of 4. ....                                 | 36 |
| Figure S38. HMBC (600 MHz, MeOD/CDCl <sub>3</sub> ) of 4. ....                                 | 37 |
| Figure S39. COSY (600 MHz, MeOD/CDCl <sub>3</sub> ) of 4. ....                                 | 37 |
| Figure S40. TOCSY (600 MHz, MeOD/CDCl <sub>3</sub> ) of 4. ....                                | 38 |
| Figure S41-a. NOESY (600 MHz, MeOD/CDCl <sub>3</sub> ) of 4. ....                              | 38 |
| Figure S41-b. ROESY (600 MHz, MeOD/CDCl <sub>3</sub> ) of 4. ....                              | 39 |
| Figure S42-a. FT-MS of 5 (Positive mode). ....                                                 | 40 |
| Figure S42-b. HR-MS of 5 (Positive mode). ....                                                 | 40 |
| Table S6. <sup>1</sup> H (600 MHz) and <sup>13</sup> C (150 MHz) spectroscopic data of 5. .... | 41 |
| Figure S43. <sup>1</sup> H NMR (600 MHz, MeOD/CDCl <sub>3</sub> ) spectrum of 5. ....          | 42 |
| Figure S44. <sup>13</sup> C NMR (600 MHz, MeOD/CDCl <sub>3</sub> ) spectrum of 5. ....         | 42 |
| Figure S45. <sup>13</sup> C-DEPT NMR (600 MHz, MeOD/CDCl <sub>3</sub> ) spectrum of 5. ....    | 43 |
| Figure S46. HSQC (600 MHz, MeOD/CDCl <sub>3</sub> ) of 5. ....                                 | 43 |

|                                                                                               |    |
|-----------------------------------------------------------------------------------------------|----|
| Figure S47. HMBC (600 MHz, MeOD/CDCl <sub>3</sub> ) of 5.....                                 | 44 |
| Figure S48. COSY (600 MHz, MeOD/CDCl <sub>3</sub> ) of 5.....                                 | 44 |
| Figure S49. TOCSY (600 MHz, MeOD/CDCl <sub>3</sub> ) of 5.....                                | 45 |
| Figure S50-a. NOESY (600 MHz, MeOD/CDCl <sub>3</sub> ) of 5.....                              | 45 |
| Figure S50-b. ROESY (600 MHz, MeOD/CDCl <sub>3</sub> ) of 5.....                              | 46 |
| Figure S51. HRESIMS of 6 (Positive mode).....                                                 | 46 |
| Table S7. <sup>1</sup> H (600 MHz) and <sup>13</sup> C (150 MHz) spectroscopic data of 6..... | 47 |
| Figure S52. <sup>1</sup> H NMR (600 MHz, MeOD) spectrum of 6.....                             | 48 |
| Figure S53. <sup>13</sup> C NMR (600 MHz, MeOD) spectrum of 6.....                            | 48 |
| Figure S54. <sup>13</sup> C-DEPT NMR (600 MHz, MeOD) spectrum of 6.....                       | 49 |
| Figure S55. HSQC (600 MHz, MeOD) of 6.....                                                    | 49 |
| Figure S56. HMBC (600 MHz, MeOD) of 6.....                                                    | 50 |
| Figure S57. COSY (600 MHz, MeOD) of 6.....                                                    | 50 |
| Figure S58-a. NOESY (600 MHz, MeOD) of 6.....                                                 | 51 |
| Figure S58-b. ROESY (600 MHz, MeOD) of 6.....                                                 | 51 |
| Table S8. <sup>1</sup> H (600 MHz) and <sup>13</sup> C (150 MHz) spectroscopic data of 7..... | 52 |
| Figure S59. HRESIMS of 7 (Positive mode).....                                                 | 53 |
| Figure S60. <sup>1</sup> H NMR (600 MHz, MeOD) spectrum of 7.....                             | 53 |
| Figure S61. <sup>13</sup> C NMR (600 MHz, MeOD) spectrum of 7.....                            | 54 |
| Figure S62. <sup>13</sup> C-DEPT NMR (600 MHz, MeOD) spectrum of 7.....                       | 54 |
| Figure S63. HSQC (600 MHz, MeOD) of 7.....                                                    | 55 |

|                                                                                                                                                                                                                                                                                                                                                                                                      |    |
|------------------------------------------------------------------------------------------------------------------------------------------------------------------------------------------------------------------------------------------------------------------------------------------------------------------------------------------------------------------------------------------------------|----|
| Figure S64. HMBC (600 MHz, MeOD) of 7.....                                                                                                                                                                                                                                                                                                                                                           | 55 |
| Figure S65. COSY (600 MHz, MeOD) of 7.....                                                                                                                                                                                                                                                                                                                                                           | 56 |
| Figure S66-a. NOESY (600 MHz, MeOD) of 7. ....                                                                                                                                                                                                                                                                                                                                                       | 56 |
| Figure S66-b. ROESY (600 MHz, MeOD) of 7. ....                                                                                                                                                                                                                                                                                                                                                       | 57 |
| Table S9. <sup>1</sup> H (600 MHz) and <sup>13</sup> C (150 MHz) spectroscopic data of 3'.....                                                                                                                                                                                                                                                                                                       | 58 |
| Figure S67. HRESIMS of 3' (Positive mode). ....                                                                                                                                                                                                                                                                                                                                                      | 59 |
| Figure S68. <sup>1</sup> H NMR (600 MHz, 90% MeOD/C <sub>6</sub> D <sub>6</sub> ) spectrum of 3'. ....                                                                                                                                                                                                                                                                                               | 59 |
| Figure S69. <sup>13</sup> C NMR (600 MHz, 90% MeOD/C <sub>6</sub> D <sub>6</sub> ) spectrum of 3'. ....                                                                                                                                                                                                                                                                                              | 60 |
| Figure S70. <sup>13</sup> C-DEPT NMR (600 MHz, 90% MeOD/C <sub>6</sub> D <sub>6</sub> ) spectrum of 3'...                                                                                                                                                                                                                                                                                            | 60 |
| Figure S71. HSQC (600 MHz, 90% MeOD/C <sub>6</sub> D <sub>6</sub> ) of 3'. ....                                                                                                                                                                                                                                                                                                                      | 61 |
| Figure S72. HMBC (600 MHz, 90% MeOD/C <sub>6</sub> D <sub>6</sub> ) of 3'. ....                                                                                                                                                                                                                                                                                                                      | 61 |
| Figure S73. COSY (600 MHz, 90% MeOD/C <sub>6</sub> D <sub>6</sub> ) of 3'. ....                                                                                                                                                                                                                                                                                                                      | 62 |
| Figure S74. NOESY (600 MHz, 90% MeOD/C <sub>6</sub> D <sub>6</sub> ) of 3'.....                                                                                                                                                                                                                                                                                                                      | 62 |
| Figure S75. Kinetic analysis with Surface Plasmon Resonance (SPR) for A) ikarugamycin (1) and B) capsimycin B (3) binding to the IkaD. ....                                                                                                                                                                                                                                                          | 63 |
| Table S10. Binding affinities and kinetic parameters for the interactions between ikarugamycin (1) and capsimycin B (3) with IkaD as measured with SPR. ....                                                                                                                                                                                                                                         | 63 |
| Figure S76. The reactions of capsimycin B (3) with NaX (X = Cl, Br, I). Targeted products were detected under the following conditions. A) Reaction of compound 3 in MeOH/H <sub>2</sub> O; UPLC-total ion chromatography MS profiles of the products produced under the condition of B) 1 h after the mixing with TFA at room temperature; C) 1 h after the mixing with TFA at 45 °C; D) MS spectra |    |

|                                                                                                                                                                                                                                                                                                                                                                                                                                                                                                                    |    |
|--------------------------------------------------------------------------------------------------------------------------------------------------------------------------------------------------------------------------------------------------------------------------------------------------------------------------------------------------------------------------------------------------------------------------------------------------------------------------------------------------------------------|----|
| of (a) capsimycin B + HCl, (b) capsimycin B + HBr, and (c) capsimycin B + HI.<br>.....                                                                                                                                                                                                                                                                                                                                                                                                                             | 65 |
| Figure S77. The reactions of capsimycin B (3) with NaX (X = Cl, Br, I). No products were detected under the following conditions. A) Reaction of compound 3 in MeOH/H <sub>2</sub> O; UPLC-total ion chromatography MS profiles of the products produced under the condition of B) immediately after the mixing at room temperature; C) 1 h after the mixing at room temperature; D) 1 h after the mixing at 45 °C.....                                                                                            | 66 |
| Figure S78. The reactions of capsimycin B (3) with H <sub>2</sub> O. Targeted product (4) was detected under the following conditions. A) Reaction of compound 3 in MeOH/H <sub>2</sub> O can be accelerated by the TFA; B) UPLC-total ion chromatography MS profiles of the products produced under the condition of a) immediately after the mixing at room temperature; b) 1 h after the mixing at 45 °C; c) 1 h after the mixing with TFA at room temperature; (d) 1 h after the mixing with TFA at 45 °C..... | 67 |
| Figure S79. Gel filtration of purified IkaD indicated with the blue line.....                                                                                                                                                                                                                                                                                                                                                                                                                                      | 68 |
| Figure S80. IkaD identification by nano LC-MS/MS and database search.....                                                                                                                                                                                                                                                                                                                                                                                                                                          | 69 |
| Protein identification by nano LC-MS/MS and database search .....                                                                                                                                                                                                                                                                                                                                                                                                                                                  | 70 |
| Figure S81. Expanded NOESY spectra (600 MHz, MeOD/CDCl <sub>3</sub> ) of 4 (A-C) and expanded ROESY spectra (600 MHz, MeOH/CDCl <sub>3</sub> ) of 5 (D-E).....                                                                                                                                                                                                                                                                                                                                                     | 71 |

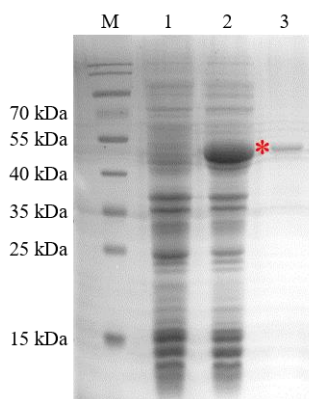

**Figure S1.** Coomassie blue stained SDS-PAGE gel analysis of IkaD.

Lanes: M, protein marker; 1, control, cell free supernatant of crude *E. coli* Rosetta (DE3) without IPTG induced; 2, expressing IkaD by IPTG induced; 3, purified C-terminal 6 × His tagged IkaD.

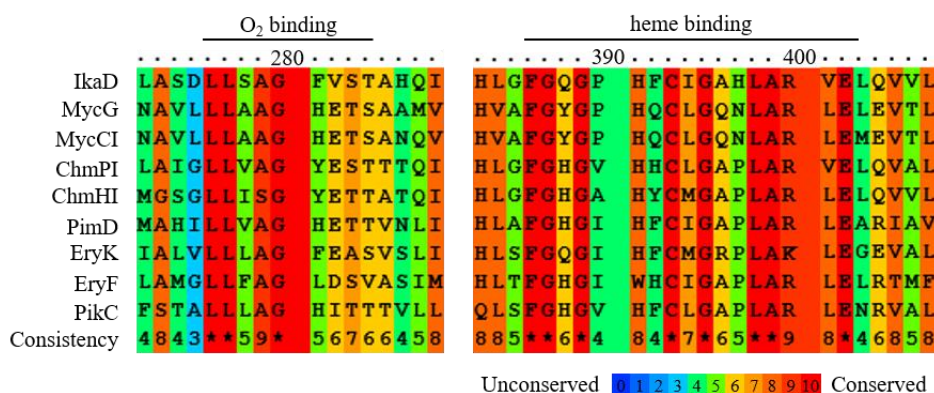

**Figure S2.** Alignment of IkaD to some macrolide P450 monooxygenases.

The O<sub>2</sub> binding region and the heme binding pocket were showed as the solid line on the left and right, respectively. The scoring scheme works from 0 for the least conserved alignment position, up to 10 for the most conserved alignment position. MycG and MycCI (accession numbers Q59523 and Q83WF5), ChmPI and ChmHI (accession numbers AAS79447 and AAS79453), PimD (accession number CAC20932), EryK and EryF (accession numbers P48635 and AAA26496), and PikC (accession number O87605). The results were analysed from website of Centre for Integrative Bioinformatics VU (<http://www.ibi.vu.nl/programs/#msa>).



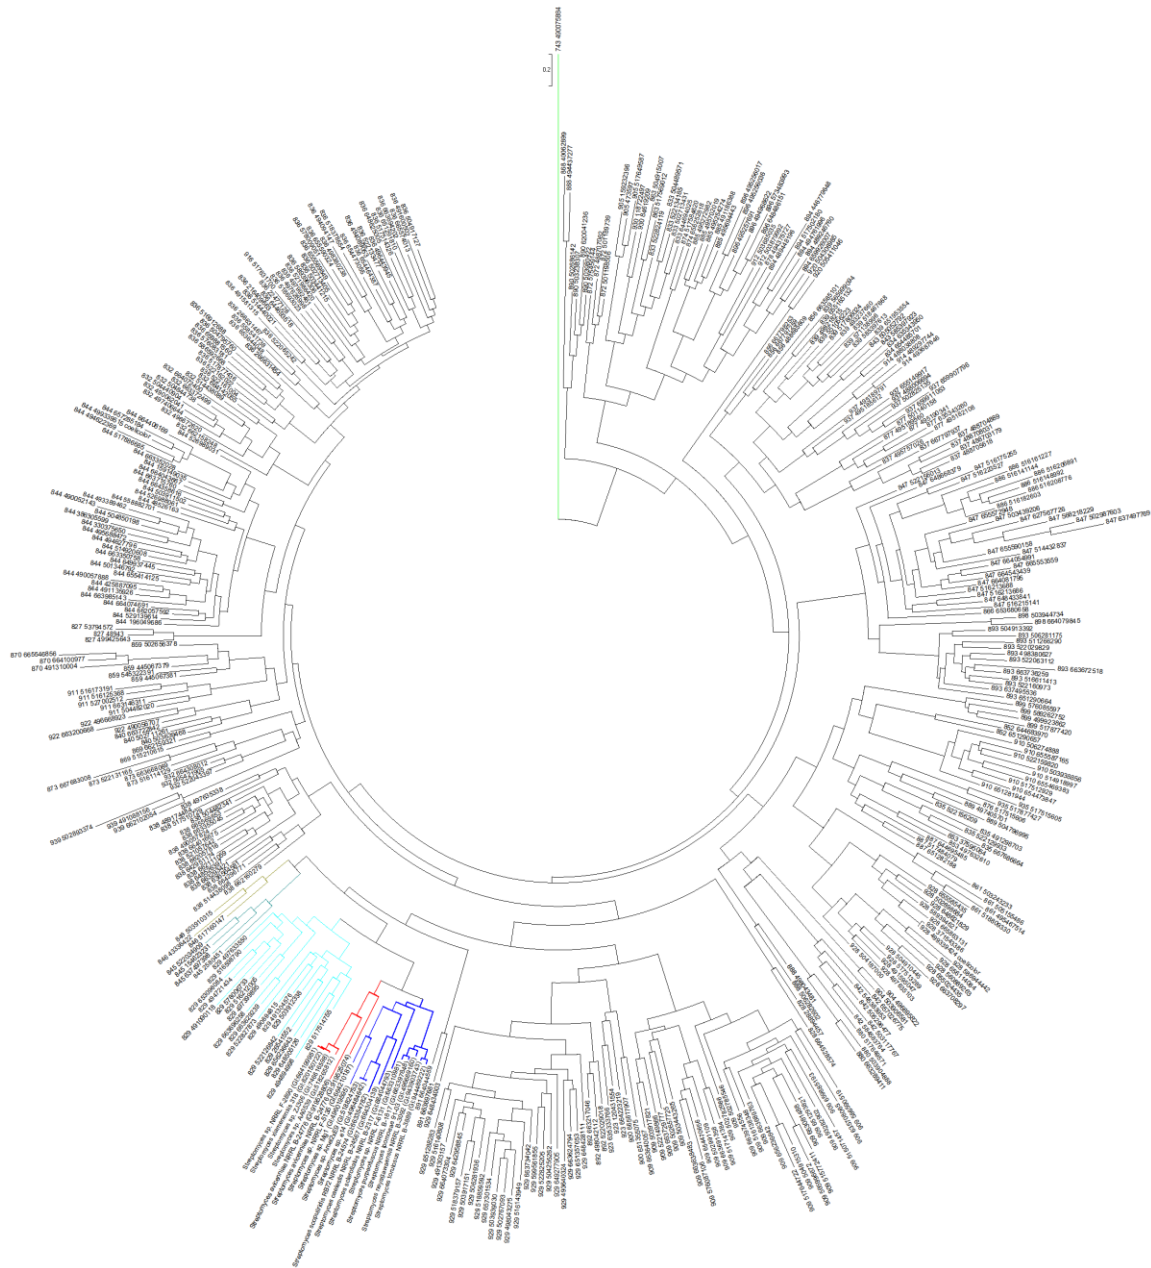

**Figure S3.** Maximum-likelihood phylogenetic tree of the novel cytochrome P450 monooxygenase IkaD (full dendrogram).

Maximum-likelihood phylogenetic tree of 430 representative amino acid sequences in the CYP107-clan and 6 CYP107-clan-like amino acid sequences, including the cytochrome P450 monooxygenase IkaD (SXIM\_40690, GI:820150722). The tree was rooted using a

CYP102-clan of P450 superfamily member (GI:490075884 from *S. coelicolor*). The part of the dendrogram shown in Figure 5 was labeled in color. Bar, 0.02 substitutions per nucleotide position. Number for each branch is consisted of three letters that stand for the homologues family id according to CYPED, and follow by a string of NCBI gi number after the blank space.

**Table S1.** Summary of the P450 monooxygenases (Sxim\_40690) BlastP analysis.

| Query protein  | Size* | Locus      | Name | Identity/Coverage |        |        |       |        |   |
|----------------|-------|------------|------|-------------------|--------|--------|-------|--------|---|
|                |       |            |      | 1                 | 2      | 3      | 4     | 5      | 6 |
| WP_046725809.1 | 3125  | SXIM_40840 | IkaA | 99/100            | 99/99  | 87/99  | 70/99 | 67/99  |   |
| WP_053116264.1 | 611   | SXIM_40830 | IkaB | 100/100           | 99/97  | 92/93  | 75/97 | 68/90  |   |
| WP_030733536.1 | 349   | SXIM_40820 | IkaC | 99/100            | \      | 89/100 | 66/99 | 64/100 |   |
| WP_046724814.1 | 409   | SXIM_40690 | IkaD | 99/100            | 99/100 | 90/100 | 59/97 | \      |   |

1, *Streptomyces xiamenensis* 318; 2, *Streptomyces* sp. ZJ306; 3, *Streptomyces* sp. NRRL F-2890; 4, *Streptomyces* sp. AA0539; 5, *Streptomyces avicenniae*; 6, *Streptomyces grisesus*. Size\*, amino acid numbers.

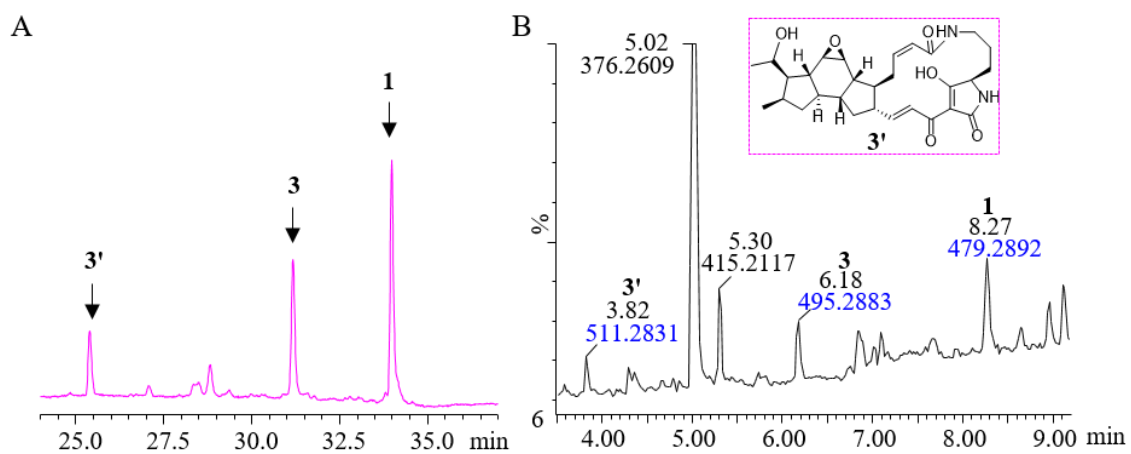

**Figure S4.** HPLC (A) and UPLC (B) profiles of ikarugamycin (**1**) conversions into capsimycin (**3**) and **3'** catalyzed by IkaD *in vitro*.

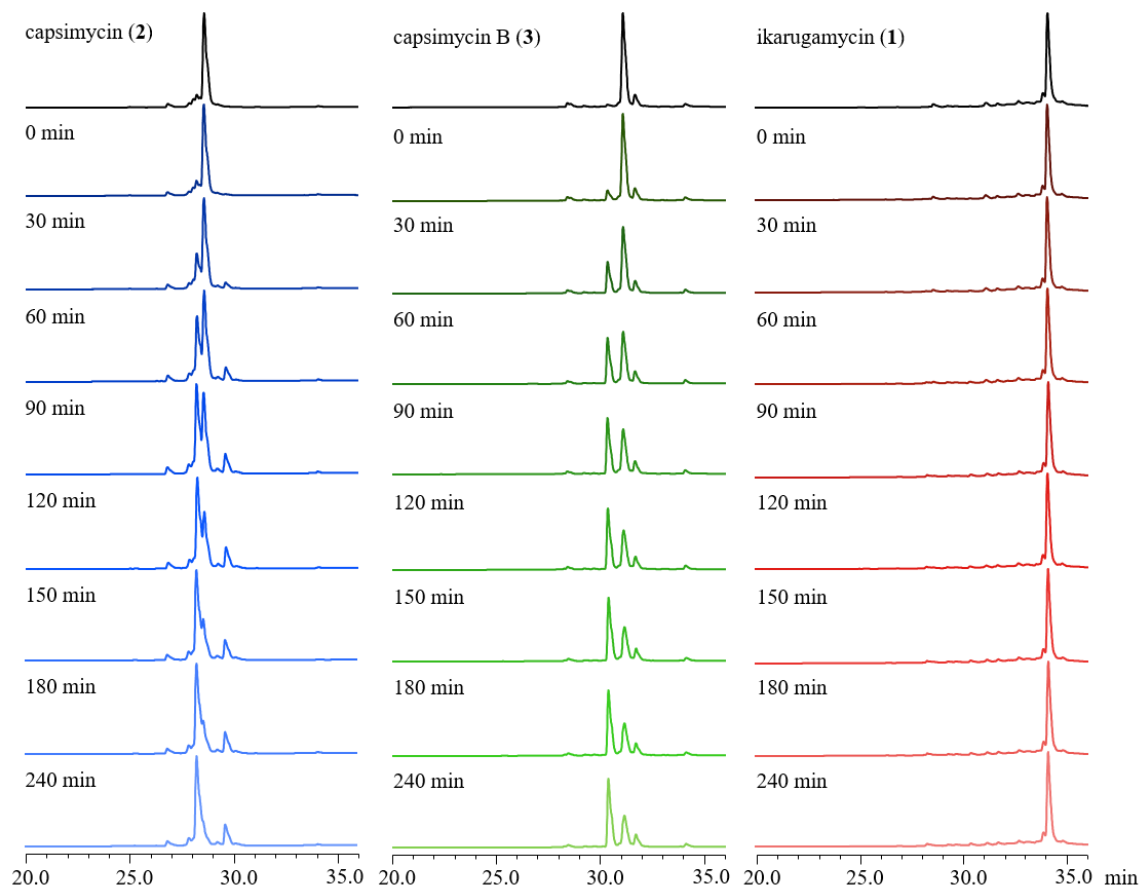

**Figure S5.** HPLC analysis of the changes of capsimycin (**2**), capsimycin B (**3**), and ikarugamycin (**1**) in methanol solution (contained 1% TFA) at 45 °C with different time.

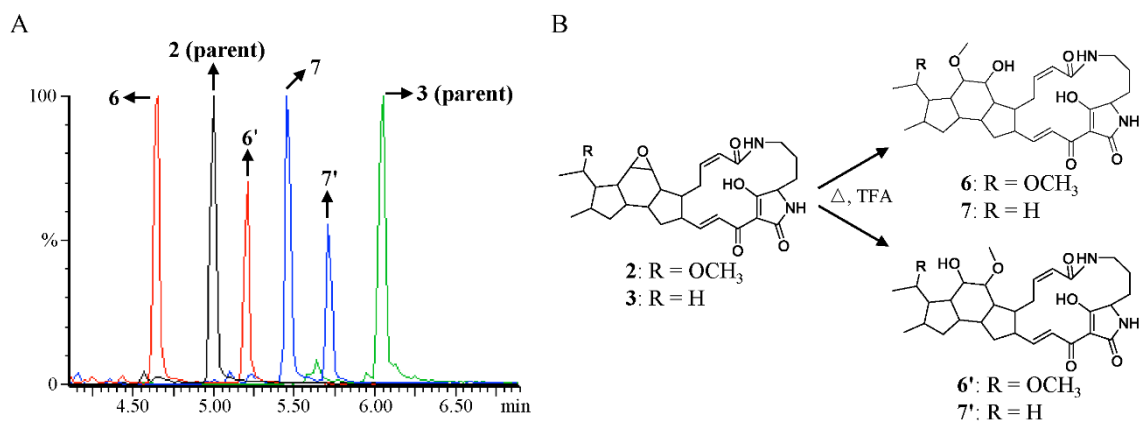

**Figure S6.** Analysis of capsimycin (**2**) and capsimycin B (**3**) acidification.

A) Extracted ion chromatography of compounds related to acidized **2** and **3** by UPLC-ESI-MS. B) proposed mechanisms for acidification of **2** and **3**.

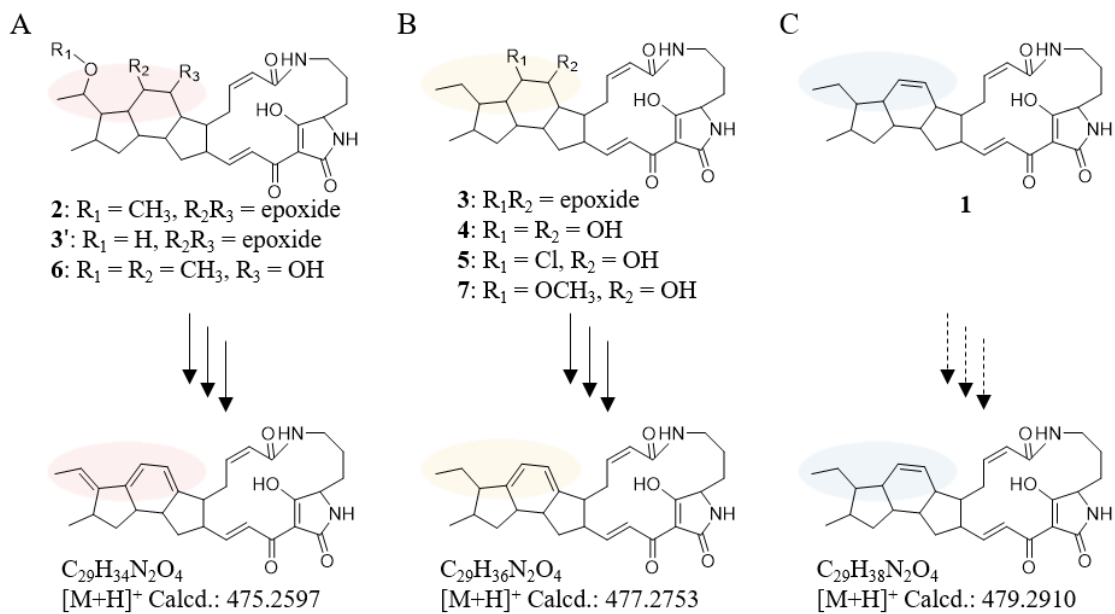

**Figure S7.** Proposed three fragmentation patterns (A-C) of compound **1-7** in secondary mass spectrometry.

**Table S2.** Fragment ions of compounds **1-7** in the positive mode.

|           | m/z Found | m/z Calculated | %Base                            | Formula                                                       | mDa  | ppm   |
|-----------|-----------|----------------|----------------------------------|---------------------------------------------------------------|------|-------|
| ika (1)   | 479.2908  | 479.2910       | 100                              | C <sub>29</sub> H <sub>39</sub> N <sub>2</sub> O <sub>4</sub> | -0.2 | -0.4  |
|           | 461.2809  | 461.2804       | 52                               | C <sub>29</sub> H <sub>37</sub> N <sub>2</sub> O <sub>3</sub> | 0.5  | 1.1   |
|           | 443.2706  | 443.2699       | 52                               | C <sub>29</sub> H <sub>35</sub> N <sub>2</sub> O <sub>2</sub> | 0.7  | 1.6   |
|           | 433.2835  | 433.2855       | 12                               | C <sub>28</sub> H <sub>37</sub> N <sub>2</sub> O <sub>2</sub> | -2.0 | -4.6  |
|           | 425.2594  | 425.2593       | 16                               | C <sub>29</sub> H <sub>33</sub> N <sub>2</sub> O              | 0.1  | 0.2   |
|           | 323.2031  | 323.2011       | 26                               | C <sub>22</sub> H <sub>27</sub> O <sub>2</sub>                | 2.0  | 6.2   |
|           | 305.1914  | 305.1905       | 40                               | C <sub>22</sub> H <sub>25</sub> O                             | 0.9  | 2.9   |
|           | 295.2082  | 295.2062       | 27                               | C <sub>21</sub> H <sub>27</sub> O                             | 2.0  | 6.8   |
|           | 281.1920  | 281.1905       | 84                               | C <sub>20</sub> H <sub>25</sub> O                             | 1.5  | 5.3   |
|           | 263.1814  | 263.1800       | 69                               | C <sub>20</sub> H <sub>23</sub>                               | 1.4  | 5.3   |
|           | 253.1966  | 253.1956       | 99                               | C <sub>19</sub> H <sub>25</sub>                               | 1.0  | 3.9   |
|           | 211.1488  | 211.1487       | 40                               | C <sub>16</sub> H <sub>19</sub>                               | 0.1  | 0.5   |
|           | 193.0997  | 193.0977       | 50                               | C <sub>10</sub> H <sub>13</sub> N <sub>2</sub> O <sub>2</sub> | 2.0  | 10.4  |
|           | 181.0990  | 181.0977       | 55                               | C <sub>9</sub> H <sub>13</sub> N <sub>2</sub> O <sub>2</sub>  | 1.3  | 7.2   |
|           | 165.0679  | 165.0664       | 79                               | C <sub>8</sub> H <sub>9</sub> N <sub>2</sub> O <sub>2</sub>   | 1.5  | 9.1   |
|           | 139.0882  | 139.0871       | 97                               | C <sub>7</sub> H <sub>11</sub> N <sub>2</sub> O               | 1.1  | 7.9   |
|           | 109.1028  | 109.1017       | 39                               | C <sub>8</sub> H <sub>13</sub>                                | 1.1  | 10.1  |
| cap (2)   | 525.2966  | 525.2965       | 39                               | C <sub>30</sub> H <sub>40</sub> N <sub>2</sub> O <sub>6</sub> | 0.1  | 0.2   |
|           | 507.2869  | 507.2859       | 15                               | C <sub>30</sub> H <sub>39</sub> N <sub>2</sub> O <sub>5</sub> | 1.0  | 2.0   |
|           | 493.2694  | 493.2702       | 100                              | C <sub>29</sub> H <sub>37</sub> N <sub>2</sub> O <sub>5</sub> | -0.8 | -1.6  |
|           | 475.2598  | 475.2597       | 98                               | C <sub>29</sub> H <sub>35</sub> N <sub>2</sub> O <sub>4</sub> | 0.1  | 0.2   |
|           | 457.2501  | 457.2491       | 42                               | C <sub>29</sub> H <sub>33</sub> N <sub>2</sub> O <sub>3</sub> | 1.0  | 2.2   |
|           | 449.2454  | 449.2440       | 22                               | C <sub>27</sub> H <sub>33</sub> N <sub>2</sub> O <sub>4</sub> | 1.4  | 3.1   |
|           | 439.2401  | 439.2386       | 15                               | C <sub>29</sub> H <sub>31</sub> N <sub>2</sub> O <sub>2</sub> | 1.5  | 3.4   |
|           | 429.2520  | 429.2542       | 11                               | C <sub>28</sub> H <sub>33</sub> N <sub>2</sub> O <sub>2</sub> | -2.2 | -5.1  |
|           | 319.1720  | 319.1698       | 14                               | C <sub>22</sub> H <sub>23</sub> O <sub>2</sub>                | 2.2  | 6.9   |
|           | 291.1761  | 291.1749       | 14                               | C <sub>21</sub> H <sub>23</sub> O                             | 1.4  | 4.1   |
|           | 277.1612  | 277.1592       | 45                               | C <sub>20</sub> H <sub>21</sub> O                             | 2.0  | 7.2   |
|           | 249.1616  | 249.1643       | 16                               | C <sub>19</sub> H <sub>21</sub>                               | -2.7 | -10.8 |
|           | 209.1350  | 209.1330       | 22                               | C <sub>16</sub> H <sub>17</sub>                               | 2.0  | 9.6   |
|           | 193.0999  | 193.0977       | 22                               | C <sub>10</sub> H <sub>13</sub> N <sub>2</sub> O <sub>2</sub> | 2.2  | 11.4  |
|           | 181.1000  | 181.0977       | 32                               | C <sub>9</sub> H <sub>13</sub> N <sub>2</sub> O <sub>2</sub>  | 2.3  | 12.7  |
|           | 165.0684  | 165.0664       | 47                               | C <sub>8</sub> H <sub>9</sub> N <sub>2</sub> O <sub>2</sub>   | 2.0  | 12.1  |
|           | 139.0892  | 139.0871       | 50                               | C <sub>7</sub> H <sub>11</sub> N <sub>2</sub> O               | 2.1  | 15.1  |
| 122.0628  | 122.0606  | 6              | C <sub>7</sub> H <sub>8</sub> NO | 2.2                                                           | 18.0 |       |
| cap B (3) | 495.2853  | 495.2859       | 86                               | C <sub>29</sub> H <sub>39</sub> N <sub>2</sub> O <sub>5</sub> | -0.6 | -1.2  |
|           | 477.2761  | 477.2753       | 100                              | C <sub>29</sub> H <sub>37</sub> N <sub>2</sub> O <sub>4</sub> | 0.8  | 1.7   |
|           | 459.2661  | 459.2648       | 54                               | C <sub>29</sub> H <sub>35</sub> N <sub>2</sub> O <sub>3</sub> | 1.3  | 2.8   |
|           | 441.2549  | 441.2542       | 20                               | C <sub>29</sub> H <sub>33</sub> N <sub>2</sub> O <sub>2</sub> | 0.7  | 1.6   |
|           | 431.2694  | 431.2699       | 14                               | C <sub>28</sub> H <sub>35</sub> N <sub>2</sub> O <sub>2</sub> | -0.5 | -1.2  |
|           | 321.1855  | 321.1855       | 15                               | C <sub>22</sub> H <sub>25</sub> O <sub>2</sub>                | 0.0  | 0.0   |
|           | 293.1916  | 293.1905       | 14                               | C <sub>21</sub> H <sub>25</sub> O                             | 1.1  | 3.8   |
|           | 279.1766  | 279.1749       | 40                               | C <sub>20</sub> H <sub>23</sub> O                             | 1.7  | 6.1   |
|           | 251.1799  | 251.1800       | 18                               | C <sub>19</sub> H <sub>23</sub>                               | -0.1 | -0.4  |
|           | 211.1487  | 211.1487       | 10                               | C <sub>16</sub> H <sub>19</sub>                               | 0.0  | 0.0   |
|           | 193.0991  | 193.0977       | 20                               | C <sub>10</sub> H <sub>13</sub> N <sub>2</sub> O <sub>2</sub> | 1.4  | 7.3   |

|           |          |          |     |                                                                  |      |       |
|-----------|----------|----------|-----|------------------------------------------------------------------|------|-------|
|           | 181.0993 | 181.0977 | 34  | C <sub>9</sub> H <sub>13</sub> N <sub>2</sub> O <sub>2</sub>     | 1.6  | 8.8   |
|           | 165.0679 | 165.0664 | 55  | C <sub>8</sub> H <sub>9</sub> N <sub>2</sub> O <sub>2</sub>      | 1.5  | 9.1   |
|           | 139.0885 | 139.0871 | 55  | C <sub>7</sub> H <sub>11</sub> N <sub>2</sub> O                  | 1.4  | 10.1  |
| cap C (4) | 513.2963 | 513.2965 | 17  | C <sub>29</sub> H <sub>41</sub> N <sub>2</sub> O <sub>6</sub>    | -0.2 | 0.4   |
|           | 495.2858 | 495.2859 | 42  | C <sub>29</sub> H <sub>39</sub> N <sub>2</sub> O <sub>5</sub>    | -0.1 | -0.2  |
|           | 477.2717 | 477.2753 | 100 | C <sub>29</sub> H <sub>37</sub> N <sub>2</sub> O <sub>4</sub>    | -3.6 | -7.5  |
|           | 459.2641 | 459.2648 | 52  | C <sub>29</sub> H <sub>35</sub> N <sub>2</sub> O <sub>3</sub>    | -0.7 | -1.5  |
|           | 441.2534 | 441.2542 | 29  | C <sub>29</sub> H <sub>33</sub> N <sub>2</sub> O <sub>2</sub>    | -0.8 | -1.8  |
|           | 424.2310 | 424.2277 | 18  | C <sub>29</sub> H <sub>30</sub> NO <sub>2</sub>                  | 3.3  | 7.6   |
|           | 321.1847 | 321.1855 | 22  | C <sub>22</sub> H <sub>25</sub> O <sub>2</sub>                   | -0.8 | -2.5  |
|           | 303.1726 | 303.1749 | 20  | C <sub>22</sub> H <sub>23</sub> O                                | -2.3 | -7.6  |
|           | 293.1906 | 293.1905 | 15  | C <sub>21</sub> H <sub>25</sub> O                                | 0.1  | 0.3   |
|           | 279.1743 | 279.1749 | 82  | C <sub>20</sub> H <sub>23</sub> O                                | -0.6 | -2.1  |
|           | 251.1777 | 251.1800 | 28  | C <sub>19</sub> H <sub>23</sub>                                  | -2.3 | -9.2  |
|           | 211.1485 | 211.1487 | 31  | C <sub>16</sub> H <sub>19</sub>                                  | -0.2 | -0.9  |
|           | 193.0987 | 193.0977 | 24  | C <sub>10</sub> H <sub>13</sub> N <sub>2</sub> O <sub>2</sub>    | 1.0  | 5.2   |
|           | 181.0986 | 181.0977 | 33  | C <sub>9</sub> H <sub>13</sub> N <sub>2</sub> O <sub>2</sub>     | 0.9  | 5.0   |
|           | 165.0672 | 165.0664 | 43  | C <sub>8</sub> H <sub>9</sub> N <sub>2</sub> O <sub>2</sub>      | 0.8  | 4.8   |
|           | 139.0875 | 139.0871 | 50  | C <sub>7</sub> H <sub>11</sub> N <sub>2</sub> O                  | 0.4  | 2.9   |
| cap D (5) | 531.2604 | 531.2626 | 51  | C <sub>29</sub> H <sub>40</sub> N <sub>2</sub> O <sub>5</sub> Cl | -2.2 | -4.1  |
|           | 513.2505 | 513.2520 | 38  | C <sub>29</sub> H <sub>38</sub> N <sub>2</sub> O <sub>4</sub> Cl | -1.5 | -2.9  |
|           | 495.2504 | 495.2495 | 15  | C <sub>28</sub> H <sub>35</sub> N <sub>2</sub> O <sub>6</sub>    | 0.9  | 1.8   |
|           | 477.2718 | 477.2753 | 64  | C <sub>29</sub> H <sub>37</sub> N <sub>2</sub> O <sub>4</sub>    | -3.5 | -7.3  |
|           | 459.2637 | 459.2648 | 41  | C <sub>29</sub> H <sub>35</sub> N <sub>2</sub> O <sub>3</sub>    | -1.1 | -2.4  |
|           | 441.2538 | 441.2542 | 31  | C <sub>29</sub> H <sub>33</sub> N <sub>2</sub> O <sub>2</sub>    | -0.4 | -0.9  |
|           | 424.2289 | 424.2277 | 21  | C <sub>29</sub> H <sub>30</sub> NO <sub>2</sub>                  | 1.2  | 2.8   |
|           | 321.1854 | 321.1855 | 22  | C <sub>22</sub> H <sub>25</sub> O <sub>2</sub>                   | -0.1 | -0.3  |
|           | 303.1750 | 303.1749 | 21  | C <sub>22</sub> H <sub>23</sub> O                                | 0.1  | 0.3   |
|           | 293.1900 | 293.1905 | 21  | C <sub>21</sub> H <sub>25</sub> O                                | -0.5 | -1.7  |
|           | 279.1743 | 279.1749 | 100 | C <sub>20</sub> H <sub>23</sub> O                                | -0.6 | -2.1  |
|           | 251.1791 | 251.1800 | 41  | C <sub>19</sub> H <sub>23</sub>                                  | -0.9 | -3.6  |
|           | 211.1483 | 211.1487 | 34  | C <sub>16</sub> H <sub>19</sub>                                  | -0.4 | -1.9  |
|           | 193.0986 | 193.0995 | 34  | C <sub>10</sub> H <sub>13</sub> N <sub>2</sub> O <sub>2</sub>    | 0.9  | 4.7   |
|           | 181.0982 | 181.0977 | 47  | C <sub>9</sub> H <sub>13</sub> N <sub>2</sub> O <sub>2</sub>     | 0.5  | 2.8   |
|           | 165.0674 | 165.0664 | 59  | C <sub>8</sub> H <sub>9</sub> N <sub>2</sub> O <sub>2</sub>      | 1.0  | 6.1   |
|           | 139.0878 | 139.0871 | 51  | C <sub>7</sub> H <sub>11</sub> N <sub>2</sub> O                  | 0.7  | 5.0   |
|           | 109.1021 | 109.1017 | 16  | C <sub>8</sub> H <sub>13</sub>                                   | 0.4  | 3.7   |
| cap E (6) | 557.3220 | 557.3227 | 5   | C <sub>31</sub> H <sub>44</sub> N <sub>2</sub> O <sub>7</sub>    | -0.7 | -1.2  |
|           | 525.2969 | 525.2965 | 22  | C <sub>30</sub> H <sub>40</sub> N <sub>2</sub> O <sub>6</sub>    | 0.4  | 0.7   |
|           | 507.2898 | 507.2859 | 19  | C <sub>30</sub> H <sub>39</sub> N <sub>2</sub> O <sub>5</sub>    | 3.9  | 7.7   |
|           | 493.2712 | 493.2702 | 20  | C <sub>29</sub> H <sub>37</sub> N <sub>2</sub> O <sub>5</sub>    | 1.2  | 2.0   |
|           | 475.2589 | 475.2597 | 100 | C <sub>29</sub> H <sub>35</sub> N <sub>2</sub> O <sub>4</sub>    | -0.8 | -1.7  |
|           | 457.2512 | 457.2491 | 33  | C <sub>29</sub> H <sub>33</sub> N <sub>2</sub> O <sub>3</sub>    | 2.1  | 4.6   |
|           | 449.2455 | 449.2440 | 43  | C <sub>27</sub> H <sub>33</sub> N <sub>2</sub> O <sub>4</sub>    | 1.5  | 3.3   |
|           | 439.2412 | 439.2386 | 14  | C <sub>29</sub> H <sub>31</sub> N <sub>2</sub> O <sub>2</sub>    | 2.6  | 5.9   |
|           | 431.2369 | 431.2335 | 16  | C <sub>27</sub> H <sub>31</sub> N <sub>2</sub> O <sub>3</sub>    | 3.4  | 7.9   |
|           | 319.1714 | 319.1698 | 12  | C <sub>22</sub> H <sub>23</sub> O <sub>2</sub>                   | 1.6  | 5.0   |
|           | 277.1609 | 277.1592 | 49  | C <sub>20</sub> H <sub>21</sub> O                                | 1.7  | 6.1   |
|           | 249.1599 | 249.1643 | 11  | C <sub>19</sub> H <sub>21</sub>                                  | -4.4 | -17.6 |
|           | 209.1353 | 209.1330 | 26  | C <sub>16</sub> H <sub>17</sub>                                  | 2.3  | 11.0  |
|           | 193.1010 | 193.0977 | 16  | C <sub>10</sub> H <sub>13</sub> N <sub>2</sub> O <sub>2</sub>    | 3.3  | 17.1  |
|           | 181.1006 | 181.0977 | 18  | C <sub>9</sub> H <sub>13</sub> N <sub>2</sub> O <sub>2</sub>     | 2.9  | 16.0  |
|           | 165.0687 | 165.0664 | 21  | C <sub>8</sub> H <sub>9</sub> N <sub>2</sub> O <sub>2</sub>      | 2.3  | 13.9  |



|           |          |          |     |                                                               |      |       |
|-----------|----------|----------|-----|---------------------------------------------------------------|------|-------|
|           | 139.0894 | 139.0871 | 27  | C <sub>7</sub> H <sub>11</sub> N <sub>2</sub> O               | 2.3  | 16.5  |
| cap F (7) | 527.3118 | 527.3121 | 15  | C <sub>30</sub> H <sub>42</sub> N <sub>2</sub> O <sub>6</sub> | -0.3 | -0.5  |
|           | 509.2995 | 509.3015 | 15  | C <sub>30</sub> H <sub>40</sub> N <sub>2</sub> O <sub>5</sub> | -2.0 | -3.9  |
|           | 495.2838 | 495.2859 | 33  | C <sub>29</sub> H <sub>39</sub> N <sub>2</sub> O <sub>5</sub> | -2.1 | -4.2  |
|           | 477.2728 | 477.2753 | 100 | C <sub>29</sub> H <sub>36</sub> N <sub>2</sub> O <sub>4</sub> | -2.5 | -5.2  |
|           | 459.2649 | 459.2648 | 55  | C <sub>29</sub> H <sub>35</sub> N <sub>2</sub> O <sub>3</sub> | 0.1  | 0.2   |
|           | 441.2510 | 441.2542 | 33  | C <sub>29</sub> H <sub>33</sub> N <sub>2</sub> O <sub>2</sub> | -3.2 | -7.3  |
|           | 424.2281 | 424.2277 | 18  | C <sub>29</sub> H <sub>30</sub> NO <sub>2</sub>               | 0.4  | 0.9   |
|           | 321.1837 | 321.1855 | 23  | C <sub>22</sub> H <sub>25</sub> O <sub>2</sub>                | -1.8 | -5.6  |
|           | 303.1750 | 303.1749 | 23  | C <sub>22</sub> H <sub>23</sub> O                             | 0.1  | 0.3   |
|           | 279.1742 | 279.1749 | 95  | C <sub>20</sub> H <sub>23</sub> O                             | -0.7 | -2.5  |
|           | 251.1781 | 251.1800 | 26  | C <sub>19</sub> H <sub>23</sub>                               | -1.9 | -7.6  |
|           | 211.1487 | 211.1487 | 36  | C <sub>16</sub> H <sub>19</sub>                               | 0.0  | 0.0   |
|           | 193.0986 | 193.0977 | 25  | C <sub>10</sub> H <sub>13</sub> N <sub>2</sub> O <sub>2</sub> | 0.9  | 4.7   |
|           | 181.0982 | 181.0977 | 28  | C <sub>9</sub> H <sub>13</sub> N <sub>2</sub> O <sub>2</sub>  | 0.5  | 2.8   |
|           | 165.0677 | 165.0664 | 34  | C <sub>8</sub> H <sub>9</sub> N <sub>2</sub> O <sub>2</sub>   | 1.3  | 7.9   |
|           | 139.0879 | 139.0871 | 46  | C <sub>7</sub> H <sub>11</sub> N <sub>2</sub> O               | 0.8  | 5.8   |
| capG (3') | 511.2825 | 511.2808 | 14  | C <sub>29</sub> H <sub>39</sub> N <sub>2</sub> O <sub>6</sub> | 1.7  | 3.3   |
|           | 493.2687 | 493.2702 | 100 | C <sub>29</sub> H <sub>37</sub> N <sub>2</sub> O <sub>5</sub> | -1.5 | -3.0  |
|           | 475.2615 | 475.2597 | 68  | C <sub>29</sub> H <sub>35</sub> N <sub>2</sub> O <sub>4</sub> | 1.8  | 3.8   |
|           | 457.2487 | 457.2491 | 18  | C <sub>29</sub> H <sub>33</sub> N <sub>2</sub> O <sub>3</sub> | -0.4 | -0.9  |
|           | 319.1688 | 319.1698 | 14  | C <sub>22</sub> H <sub>23</sub> O <sub>2</sub>                | -1.0 | -3.1  |
|           | 277.1656 | 277.1592 | 50  | C <sub>20</sub> H <sub>21</sub> O <sub>1</sub>                | 6.4  | 23.1  |
|           | 193.0978 | 193.0977 | 32  | C <sub>10</sub> H <sub>13</sub> N <sub>2</sub> O <sub>2</sub> | 0.1  | 0.5   |
|           | 181.0948 | 181.0977 | 27  | C <sub>9</sub> H <sub>13</sub> N <sub>2</sub> O <sub>2</sub>  | -2.9 | -16.0 |

**Figure S8. ESI-HR-MS/MS of 1.**

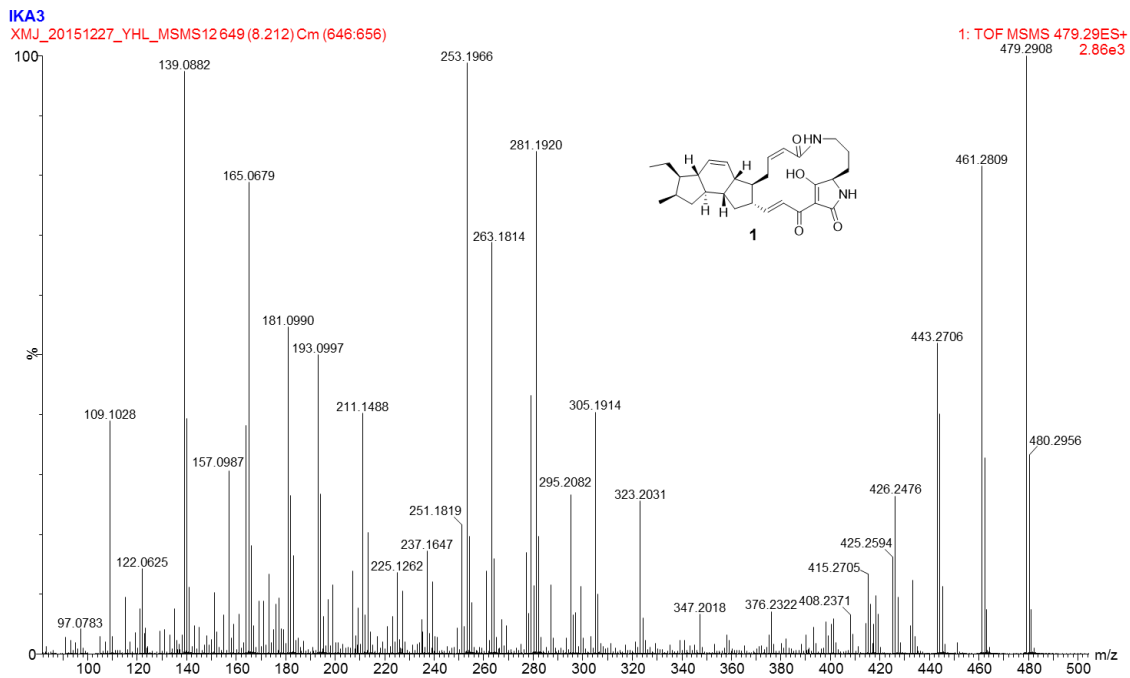

**Figure S9. ESI-HR-MS/MS of 2.**

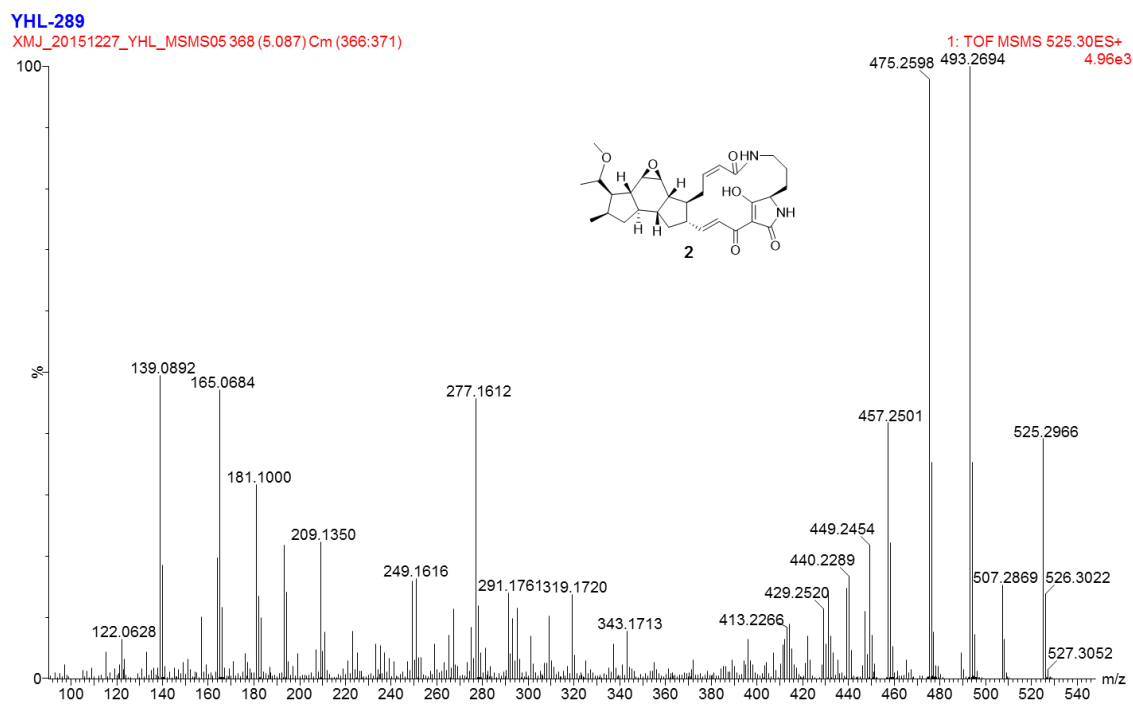

**Figure S10. ESI-HR-MS/MS of 3.**

YHL-315-1129

XMJ\_20151227\_YHL\_MSMS10 465 (6.165) Cm (463.468)

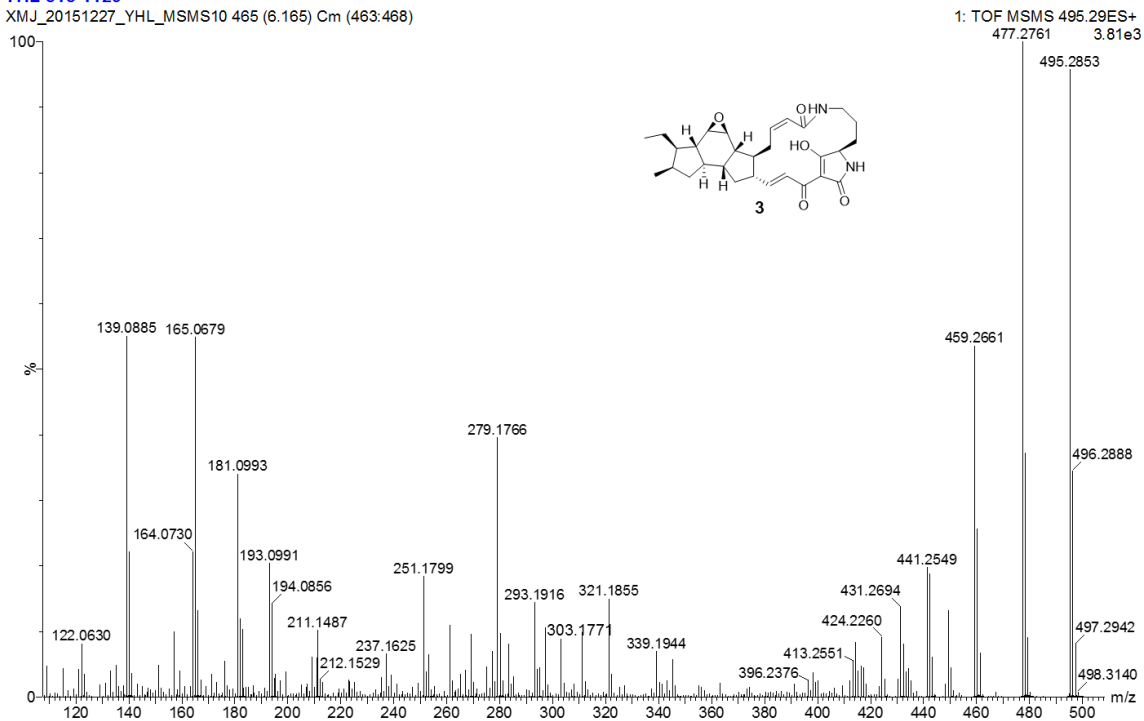

**Figure S11. ESI-HR-MS/MS of 4.**

YHL-4

XMJ\_20151227\_YHL\_MSMS04 332 (4.697) Cm (331.333)

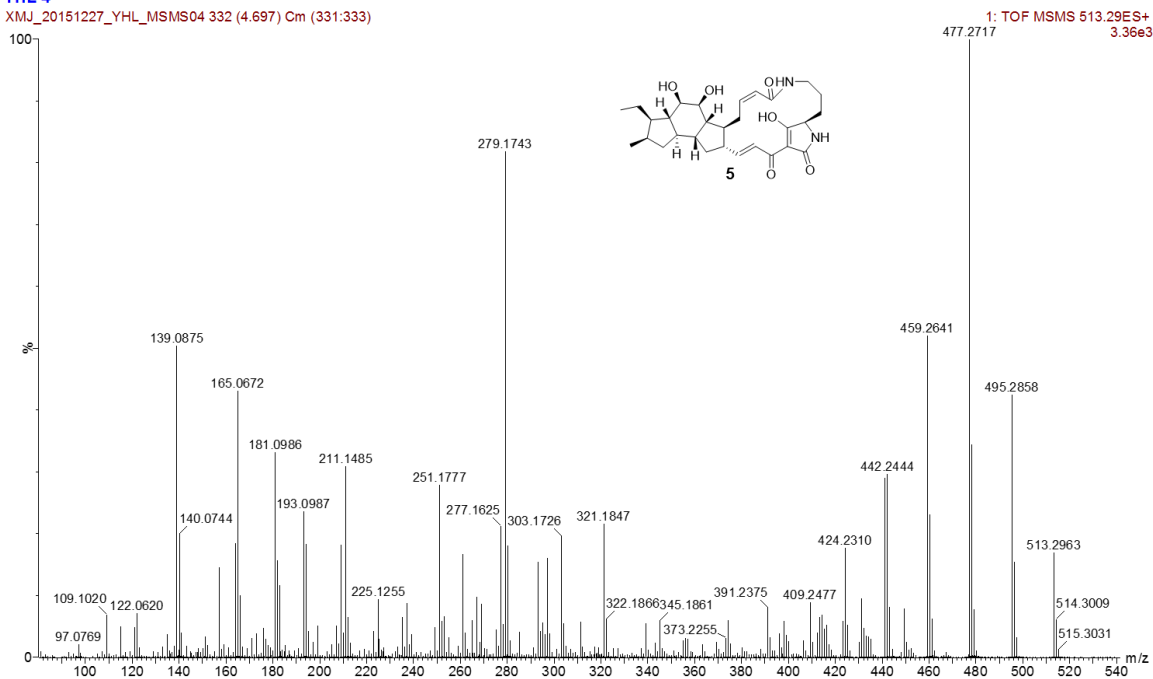

**Figure S12. ESI-HR-MS/MS of 5.**

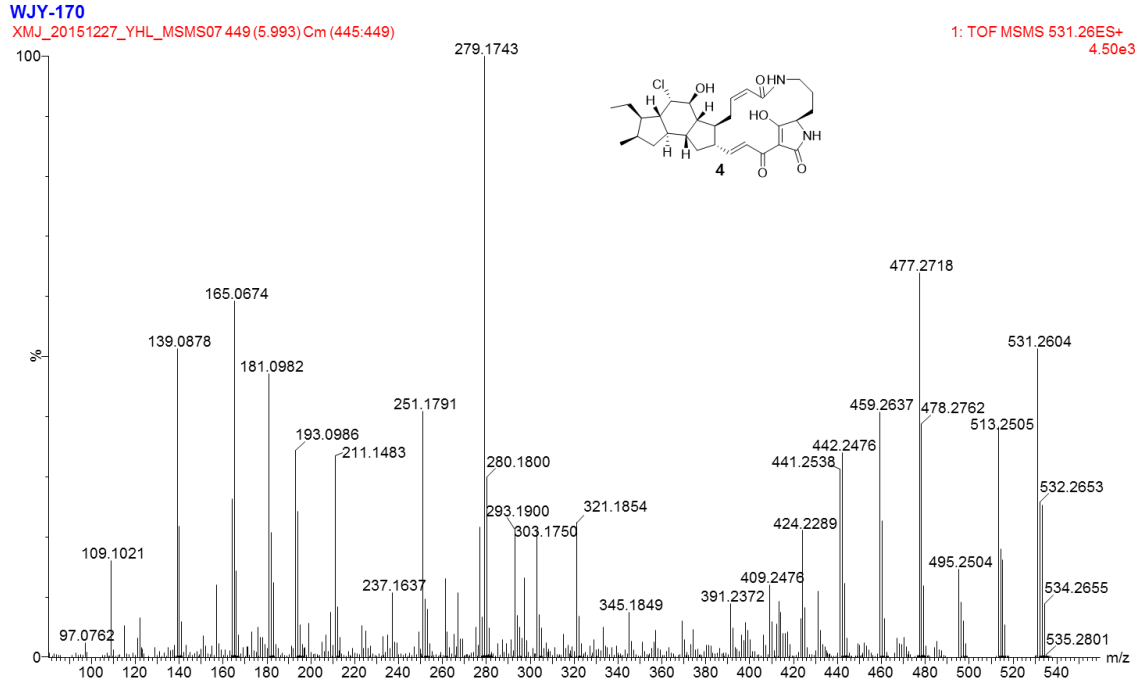

**Figure S13. ESI-HR-MS/MS of 6.**

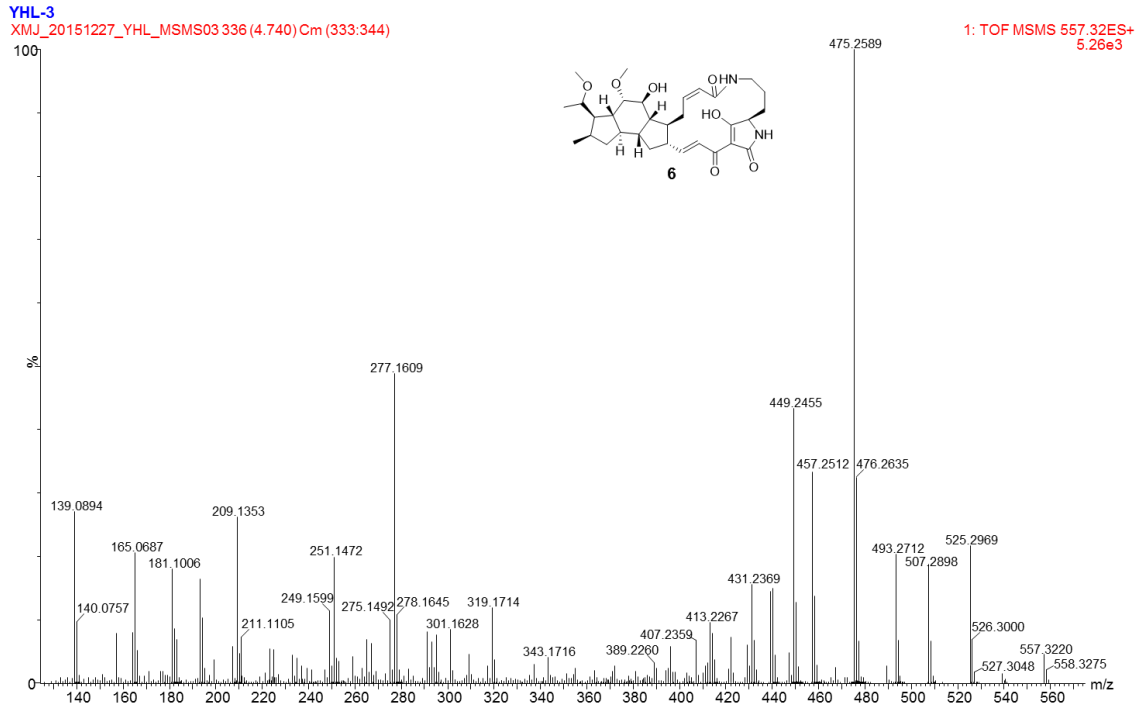

**Figure S14. ESI-HR-MS/MS of 7.**

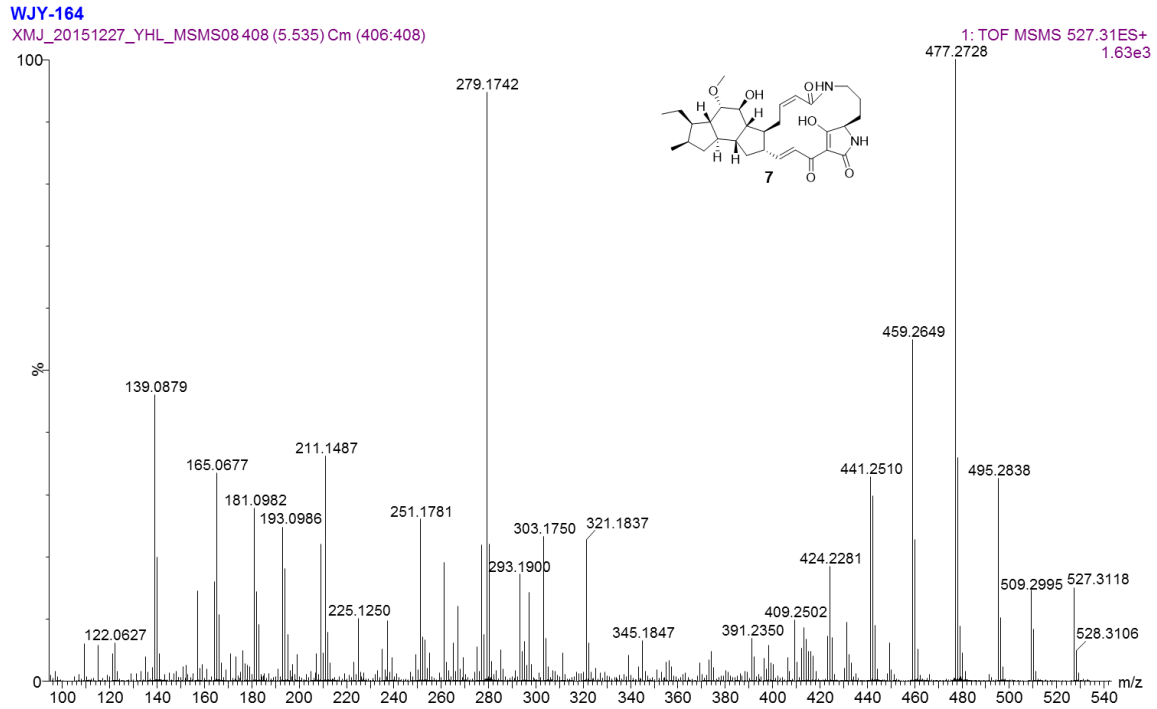

**Figure S15. ESI-HR-MS/MS of 3'.**

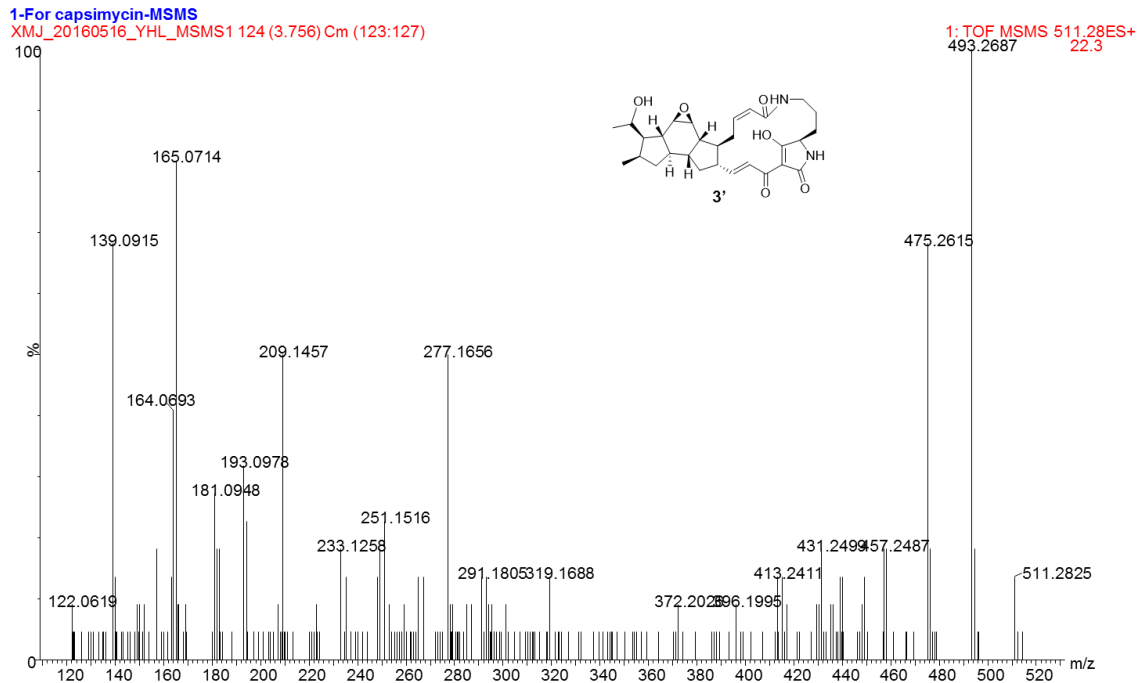

**Figure S16.** UV spectra of compounds **1-7**.

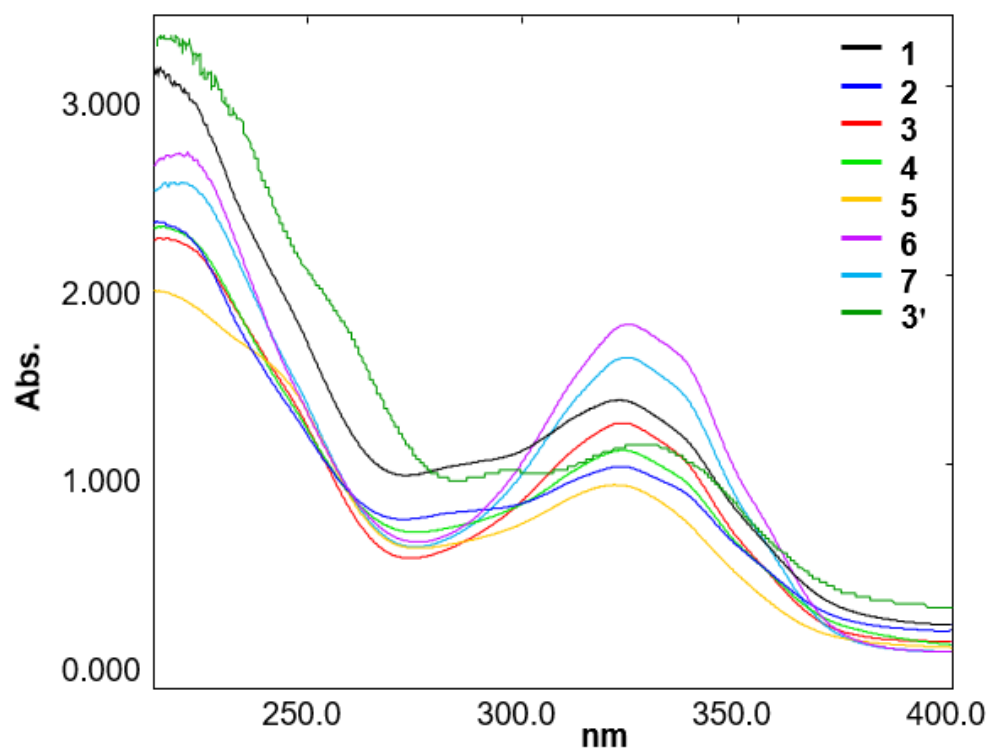

**Table S3.**  $^1\text{H}$  (600 MHz) and  $^{13}\text{C}$  (150 MHz) spectroscopic data of capsimycin (**2**).

| Position | $\delta_{\text{C}}$ , type | $\delta_{\text{H}}$ , multi ( $J$ in Hz) | HMBC (correlations from H to C) |
|----------|----------------------------|------------------------------------------|---------------------------------|
| 1        | 196.5, C                   |                                          |                                 |
| 2        | 61.6, CH                   | 3.83, br d (3.6)                         | 1, 3, 4, 27                     |
| 3        | 27.2, CH <sub>2</sub>      | 1.75, m<br>1.97, m                       | 1, 2, 4, 5                      |
| 4        | 20.9, CH <sub>2</sub>      | 1.19, m<br>1.47, m                       | 2, 3, 5                         |
| 5        | 38.9, CH <sub>2</sub>      | 2.55, br t (10.4)<br>3.61, m             | 3, 4, 7                         |
| 6-NH     |                            | 6.39, br s                               | 5, 7                            |
| 7        | 166.3, C                   |                                          |                                 |
| 8        | 124.2, CH                  | 5.82, dd (11.4, 2.0)                     | 7, 9, 10                        |
| 9        | 140.0, CH                  | 6.04, ddd (11.4, 11.4, 2.3)              | 7, 8, 11                        |
| 10       | 25.3, CH <sub>2</sub>      | 2.36, m<br>3.67, m                       | 8, 9, 11, 12                    |
| 11       | 45.5, CH                   | 1.65, m                                  | 9, 10, 12, 13, 23               |
| 12       | 40.1, CH                   | 2.31, m                                  | 10, 11, 13, 14, 15, 20          |
| 13       | 53.8, CH                   | 2.87, d (4.0)                            | 11, 12, 14, 20                  |
| 14       | 58.3, CH                   | 3.22, dd (4.0, 2.1)                      | 15                              |
| 15       | 47.1, CH                   | 0.95, m                                  | 14, 16, 20, 30                  |
| 16       | 50.1, CH                   | 1.87, m                                  | 14, 15, 17, 30, 31              |
| 17       | 33.6, CH                   | 2.30, m                                  | 16, 18, 29, 30                  |
| 18       | 39.0, CH <sub>2</sub>      | 0.59, m<br>1.96, m                       | 15, 16, 17, 19, 20, 29          |
| 19       | 47.5, CH                   | 1.07, m                                  | 14, 15, 18, 20, 21              |
| 20       | 40.8, CH                   | 1.67, m                                  | 11, 12, 18, 21                  |
| 21       | 36.8, CH <sub>2</sub>      | 1.11, m<br>2.07, m                       | 11, 12, 19, 20, 22, 23          |
| 22       | 48.7, CH                   | 2.44, m                                  | 10, 11, 21, 23, 24              |
| 23       | 151.2, CH                  | 6.69, dd (15.4, 10.1)                    | 11, 21, 22, 24, 25, 26          |
| 24       | 122.7, CH                  | 7.11, d (15.4)                           | 11, 22, 23, 25, 26              |
| 25       | 173.6, C                   |                                          |                                 |
| 26       | 100.7, C                   |                                          |                                 |
| 27       | 175.7, C                   |                                          |                                 |
| 28-NH    |                            | 7.17, br s                               |                                 |
| 29       | 17.7, CH <sub>3</sub>      | 0.93, d (7.2)                            | 16, 17, 18                      |
| 30       | 77.4, CH                   | 3.30, m                                  | 16, 17, 33                      |
| 31       | 17.4, CH <sub>3</sub>      | 1.25, d (7.2)                            | 16, 30                          |

Measured in CDCl<sub>3</sub>.  $\delta$  values are given in ppm.

### Figure S17. HRESIMS of capsimycin (2) (Positive mode).

#### Single Mass Analysis

Tolerance = 5.0 PPM / DBE: min = -1.5, max = 50.0

Element prediction: Off

Number of isotope peaks used for i-FIT = 3

Monoisotopic Mass, Even Electron Ions

558 formula(e) evaluated with 2 results within limits (up to 50 best isotopic matches for each mass)

Elements Used:

C: 0-35 H: 0-100 N: 0-5 O: 0-20

2891D

XMJ\_20151227\_YHL\_04 238 (5.093) Cm (237:239)

1: TOF MS ES+  
9.61e+004

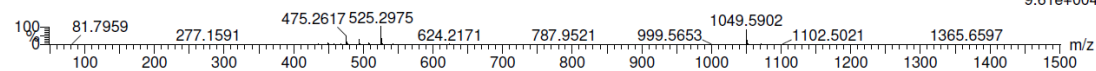

Minimum: -1.5  
Maximum: 5.0 5.0 50.0

| Mass     | Calc. Mass | mDa  | PPM  | DBE  | i-FIT | Norm  | Conf (%) | Formula        |
|----------|------------|------|------|------|-------|-------|----------|----------------|
| 525.2975 | 525.2965   | 1.0  | 1.9  | 11.5 | 256.0 | 0.427 | 65.26    | C30 H41 N2 O6  |
|          | 525.2983   | -0.8 | -1.5 | -1.5 | 256.6 | 1.057 | 34.74    | C18 H45 N4 O13 |

### Figure S18. <sup>1</sup>H NMR (600 MHz, CDCl<sub>3</sub>) spectrum of capsimycin (2).

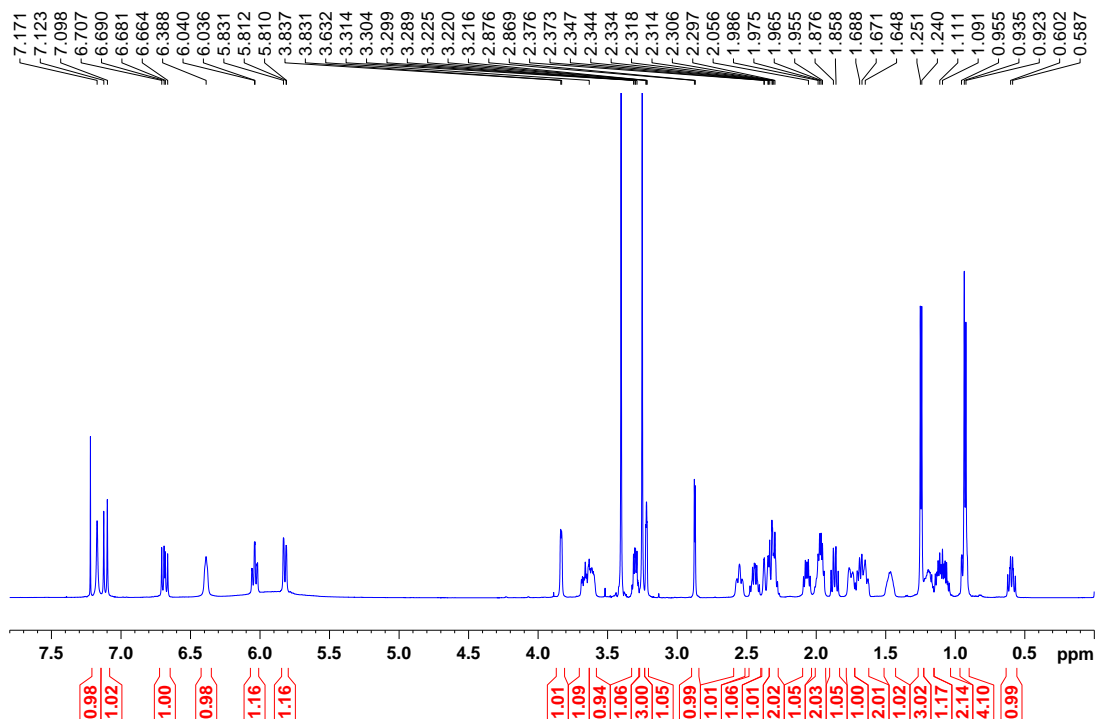



**Figure S19.**  $^{13}\text{C}$  NMR (600 MHz,  $\text{CDCl}_3$ ) spectrum of capsimycin (**2**).

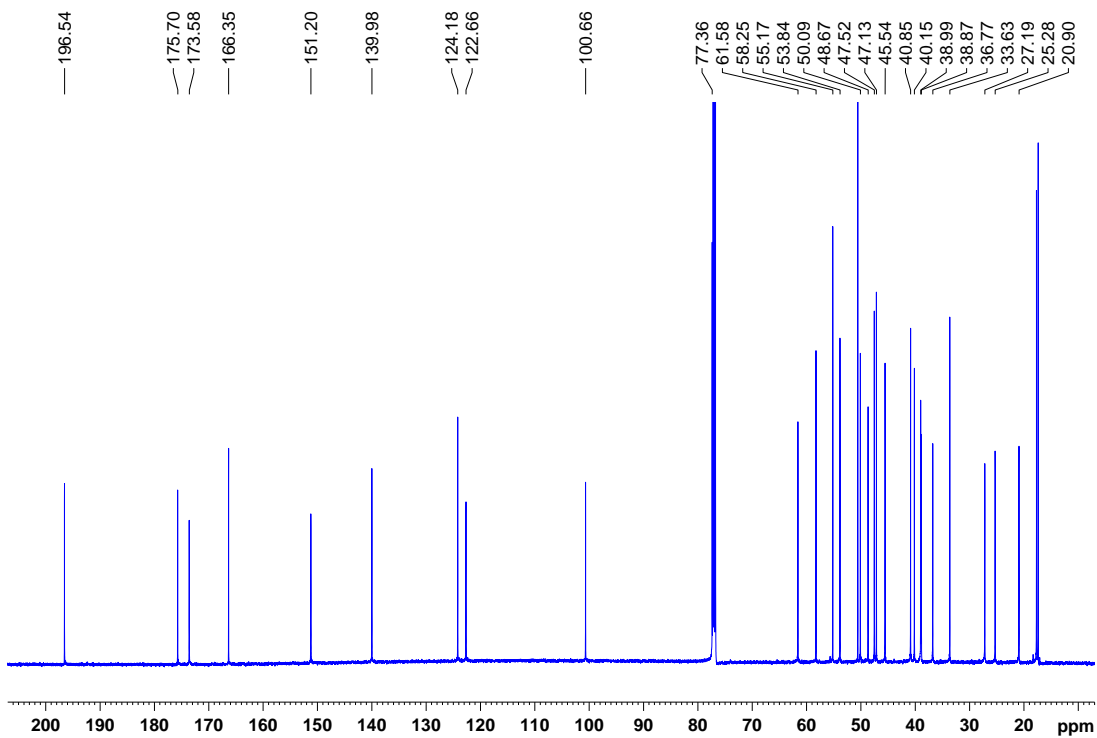

**Figure S20.** DEPT 135 (600 MHz,  $\text{CDCl}_3$ ) spectrum of capsimycin (**2**).

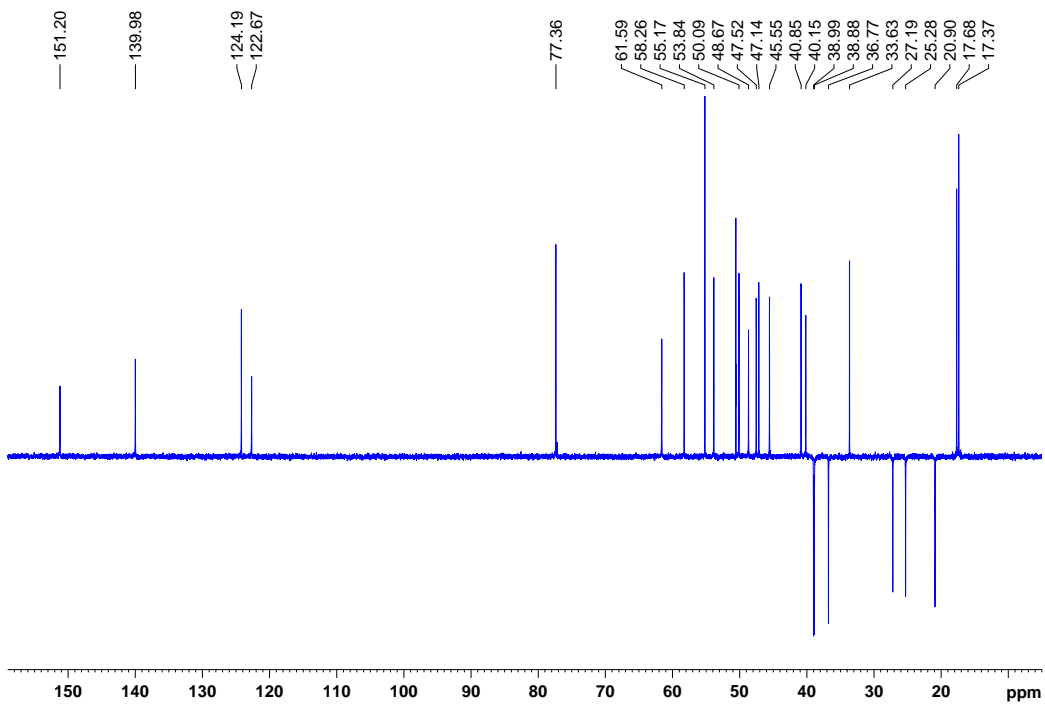

**Figure S21.** HSQC (600 MHz, CDCl<sub>3</sub>) of capsimycin (**2**).

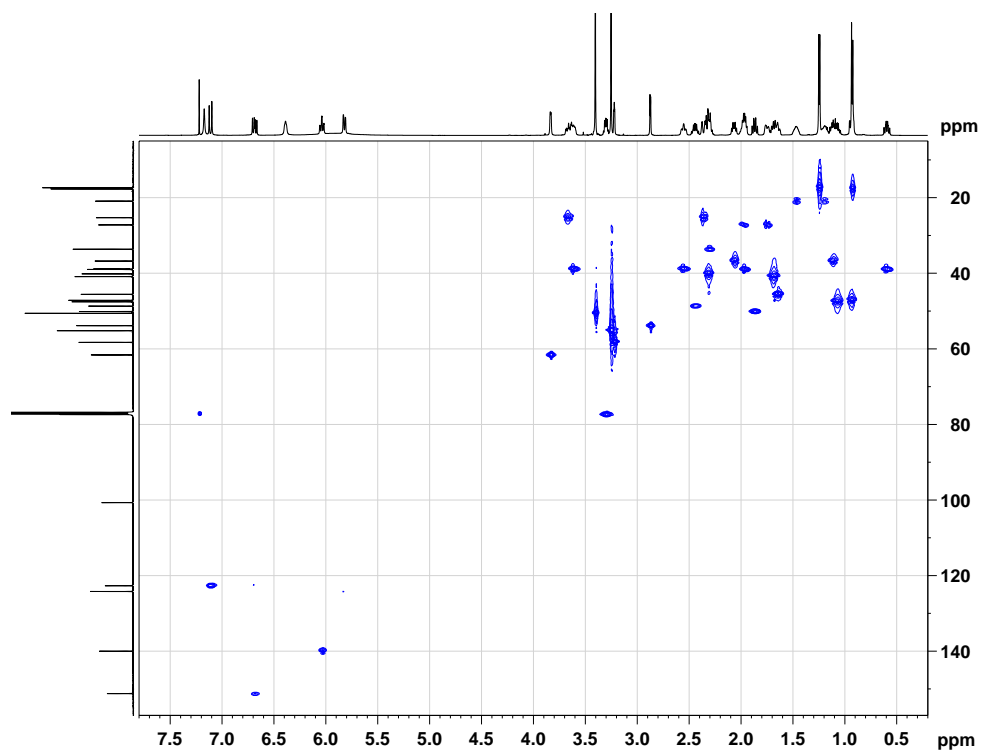

**Figure S22.** HMBC (600 MHz, CDCl<sub>3</sub>) of capsimycin (**2**).

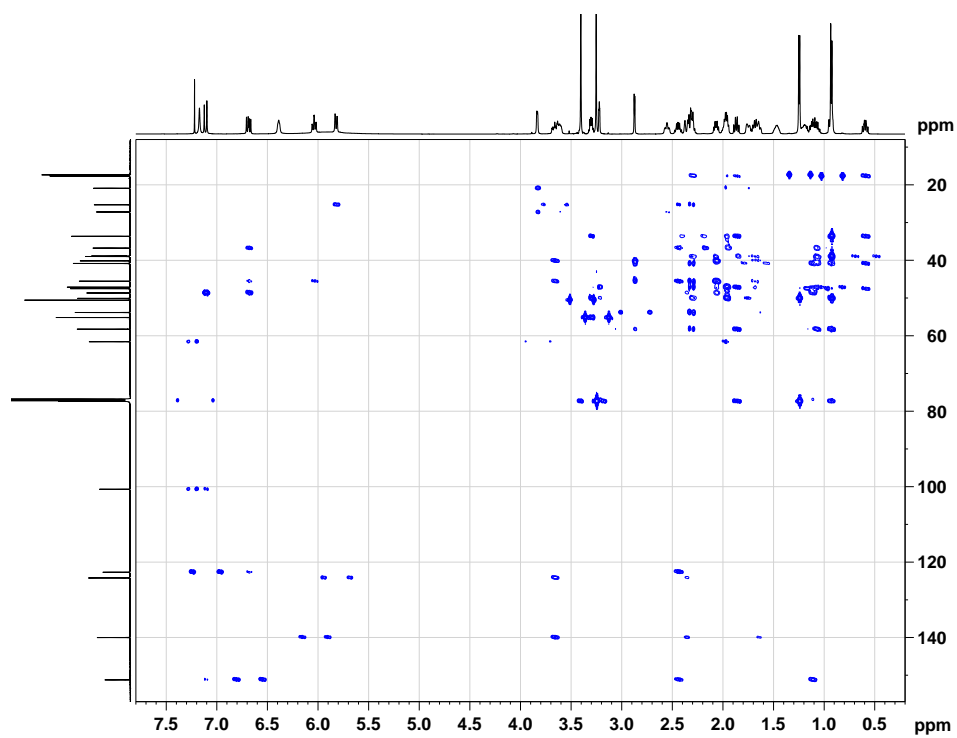

**Figure S23.** COSY (600 MHz, CDCl<sub>3</sub>) of capsimycin (**2**).

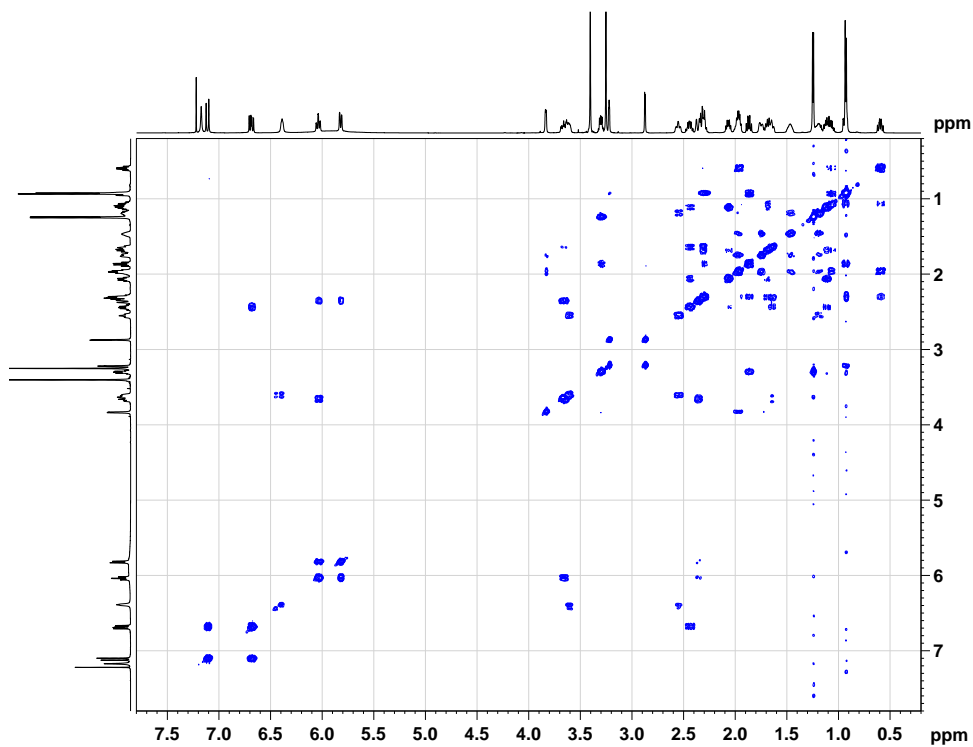

**Figure S24-a.** NOESY (600 MHz, CDCl<sub>3</sub>) of capsimycin (**2**).

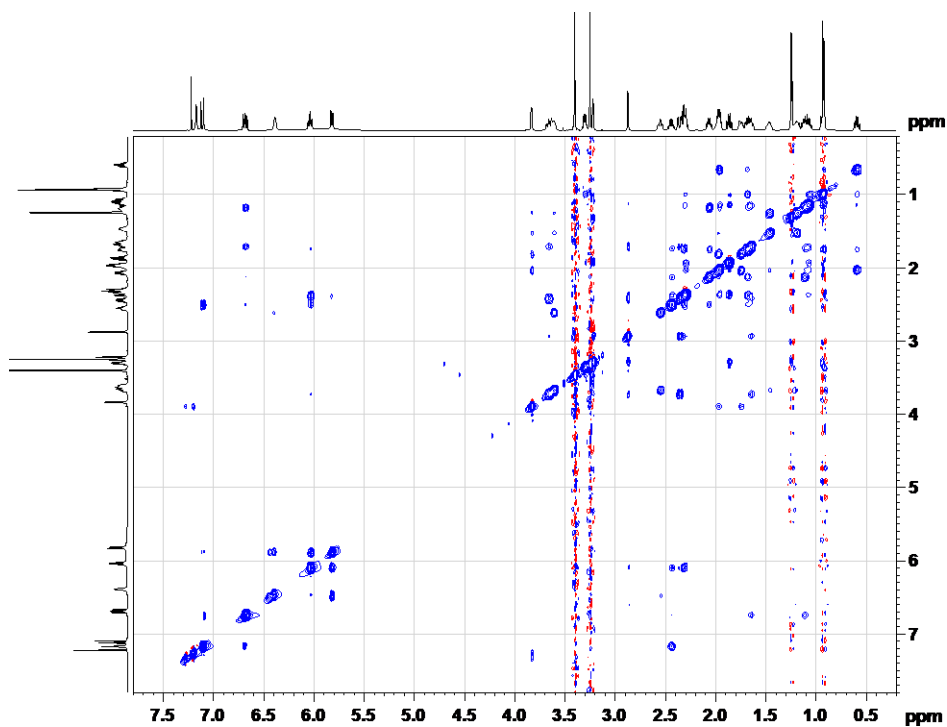

**Figure S24-b. ROESY (600 MHz, CDCl<sub>3</sub>) of capsimycin (2).**

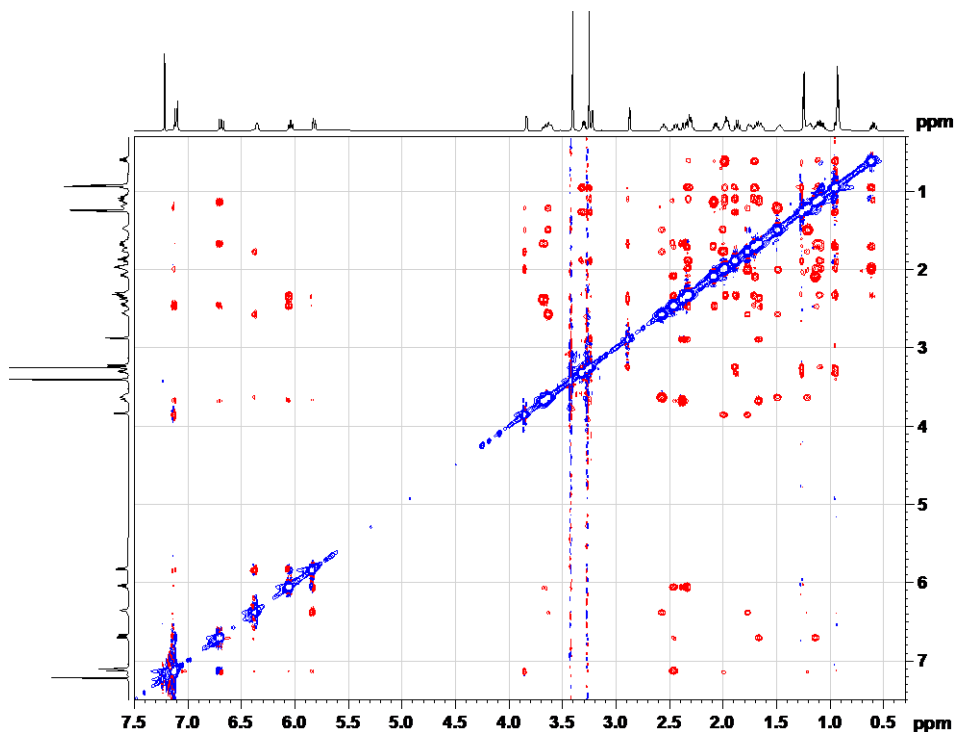

**Figure S25. HRESIMS of 3 (Positive mode).**

**Single Mass Analysis**

Tolerance = 10.0 PPM / DBE: min = -1.5, max = 50.0

Element prediction: Off

Number of isotope peaks used for i-FIT = 3

Monoisotopic Mass, Even Electron Ions

340 formula(e) evaluated with 3 results within limits (up to 50 best isotopic matches for each mass)

Elements Used:

C: 0-35 H: 0-100 N: 0-5 O: 0-10

3151

XMJ\_20151227\_YHL\_03 288 (6.165) Cm (287:288)

1: TOF MS ES+  
6.07e+004

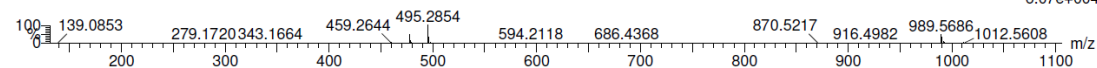

Minimum: -1.5  
Maximum: 5.0 10.0 50.0

| Mass     | Calc. Mass | mDa  | PPM  | DBE  | i-FIT | Norm  | Conf(%) | Formula       |
|----------|------------|------|------|------|-------|-------|---------|---------------|
| 495.2854 | 495.2859   | -0.5 | -1.0 | 11.5 | 214.3 | 0.980 | 37.55   | C29 H39 N2 O5 |
|          | 495.2819   | 3.5  | 7.1  | 7.5  | 214.0 | 0.672 | 51.07   | C24 H39 N4 O7 |
|          | 495.2899   | -4.5 | -9.1 | 15.5 | 215.5 | 2.173 | 11.39   | C34 H39 O3    |

**Table S4.**  $^1\text{H}$  (600 MHz) and  $^{13}\text{C}$  (150 MHz) spectroscopic data of **3**.

| Position | $\delta_{\text{C}}$ , type | $\delta_{\text{H}}$ , multi ( $J$ in Hz) | HMBC (correlations from H to C) |
|----------|----------------------------|------------------------------------------|---------------------------------|
| 1        | 195.9, C                   |                                          |                                 |
| 2        | 61.4, CH                   | 3.85, br d (3.7)                         | 1, 3, 4, 27                     |
| 3        | 27.4, CH <sub>2</sub>      | 1.77, m<br>1.98, m                       | 1, 2, 4, 5                      |
| 4        | 21.0, CH <sub>2</sub>      | 1.20, m<br>1.51, m                       | 2, 3, 5                         |
| 5        | 38.9, CH <sub>2</sub>      | 2.56, br t (11.4)<br>3.63, m             | 3, 4, 7                         |
| 6-NH     |                            |                                          |                                 |
| 7        | 166.3, C                   |                                          |                                 |
| 8        | 124.2, CH                  | 5.79, dd (11.6, 2.0)                     | 7, 9, 10                        |
| 9        | 140.4, CH                  | 6.06, ddd (11.6, 11.6, 2.5)              | 7, 10, 11                       |
| 10       | 25.5, CH <sub>2</sub>      | 2.38, m<br>3.61, m                       | 8, 9, 11, 22                    |
| 11       | 45.2, CH                   | 1.65, m                                  | 9, 10, 12, 13, 23               |
| 12       | 40.8, CH                   | 2.34, m                                  | 10, 11, 13, 14, 19, 20          |
| 13       | 53.5, CH                   | 2.89, d (3.8)                            | 11, 12, 14, 20                  |
| 14       | 57.7, CH                   | 3.13, dd (3.8, 2.0)                      | 15, 16                          |
| 15       | 49.6, CH                   | 0.91, m                                  | 14, 16, 20, 30                  |
| 16       | 46.6, CH                   | 1.60, m                                  | 14, 15, 17, 29, 30, 31          |
| 17       | 33.0, CH                   | 2.18, m                                  | 15, 16, 18, 29                  |
| 18       | 38.3, CH <sub>2</sub>      | 0.59, m<br>1.96, m                       | 15, 16, 17, 19, 20, 29          |
| 19       | 47.9, CH                   | 1.01, m                                  | 14, 15, 18, 20, 21              |
| 20       | 40.7, CH                   | 1.70, m                                  | 11, 12, 15, 18, 19, 21          |
| 21       | 36.6, CH <sub>2</sub>      | 1.11, m<br>2.06, m                       | 11, 12, 19, 20, 22              |
| 22       | 48.9, CH                   | 2.46, m                                  | 10, 11, 21, 23, 24              |
| 23       | 151.6, CH                  | 6.70, dd (15.6, 10.2)                    | 11, 21, 22, 24, 25              |
| 24       | 122.7, CH                  | 7.11, d (15.6)                           | 11, 21, 22, 23, 25, 26          |
| 25       | 173.7, C                   |                                          |                                 |
| 26       | 100.6, C                   |                                          |                                 |
| 27       | 175.5, C                   |                                          |                                 |
| 28-NH    |                            |                                          |                                 |
| 29       | 17.5, CH <sub>3</sub>      | 0.81, d (7.3)                            | 16, 17, 18                      |
| 30       | 22.5, CH <sub>2</sub>      | 1.44, m                                  | 15, 16, 17, 31                  |
| 31       | 13.2, CH <sub>3</sub>      | 0.94, d (7.3)                            | 16, 30                          |

Measured in  $\text{CDCl}_3$ .  $\delta$  values are given in ppm.

**Figure S26.**  $^1\text{H}$  NMR (600 MHz,  $\text{CDCl}_3$ ) spectrum of **3**.

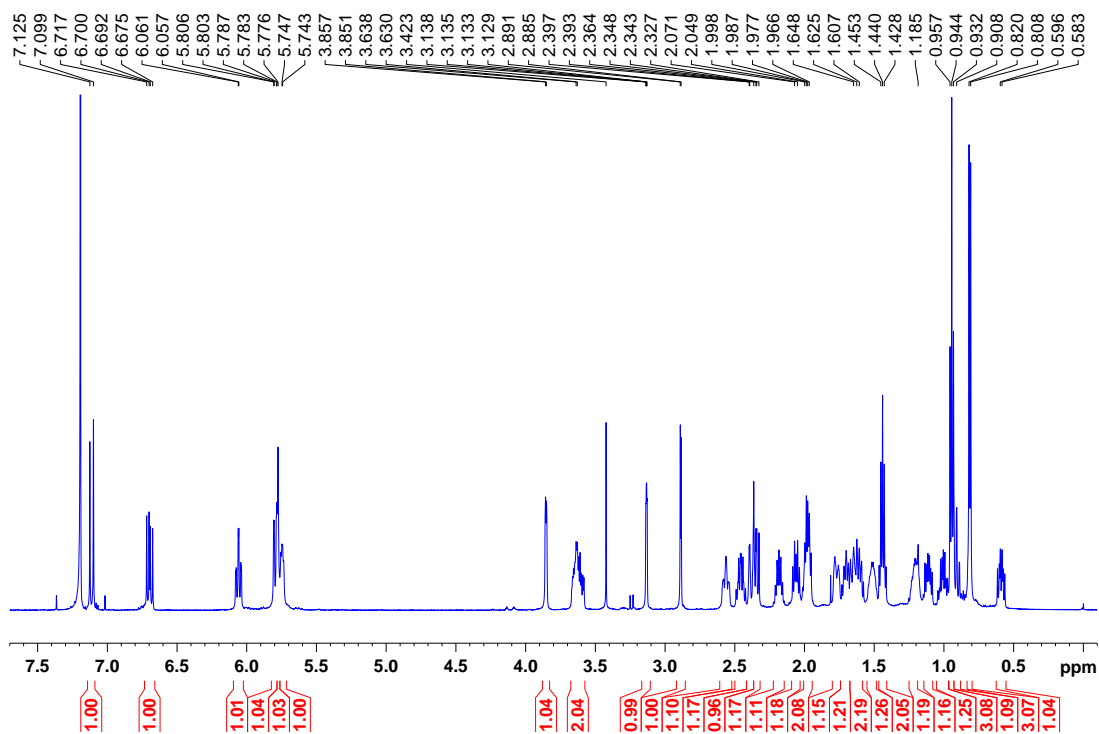

**Figure S27.**  $^{13}\text{C}$  NMR (600 MHz,  $\text{CDCl}_3$ ) spectrum of **3**.

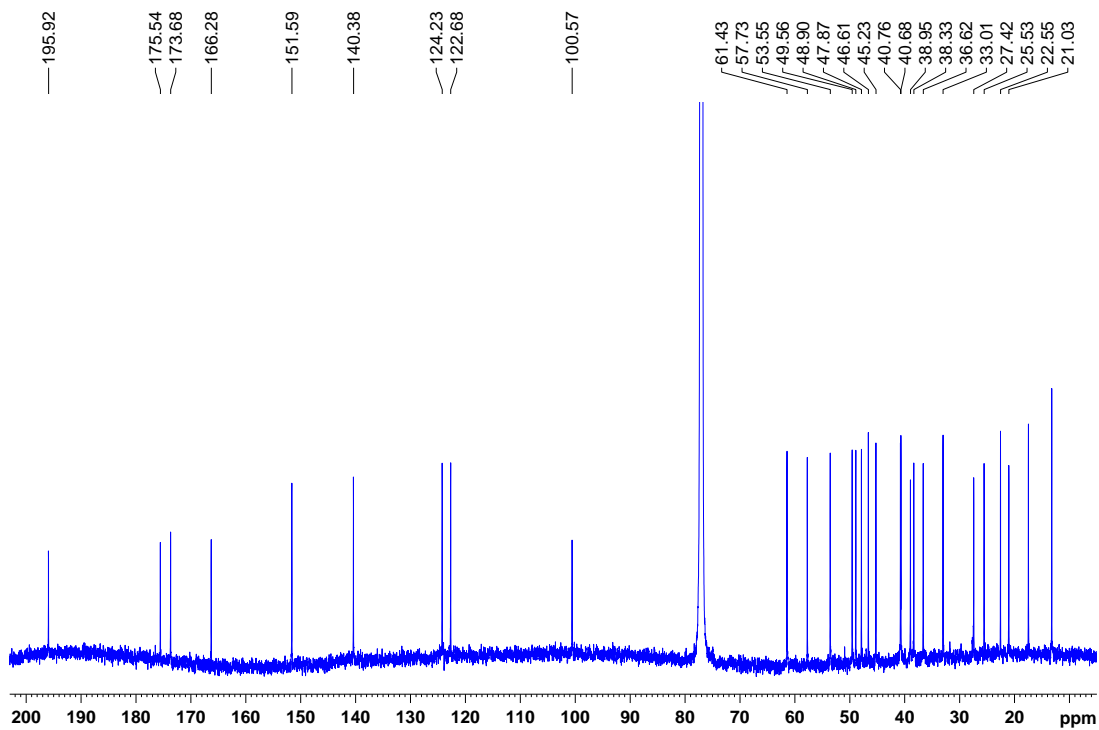

**Figure S28.**  $^{13}\text{C}$ -DEPT 135 (600 MHz,  $\text{CDCl}_3$ ) spectrum of **3**.

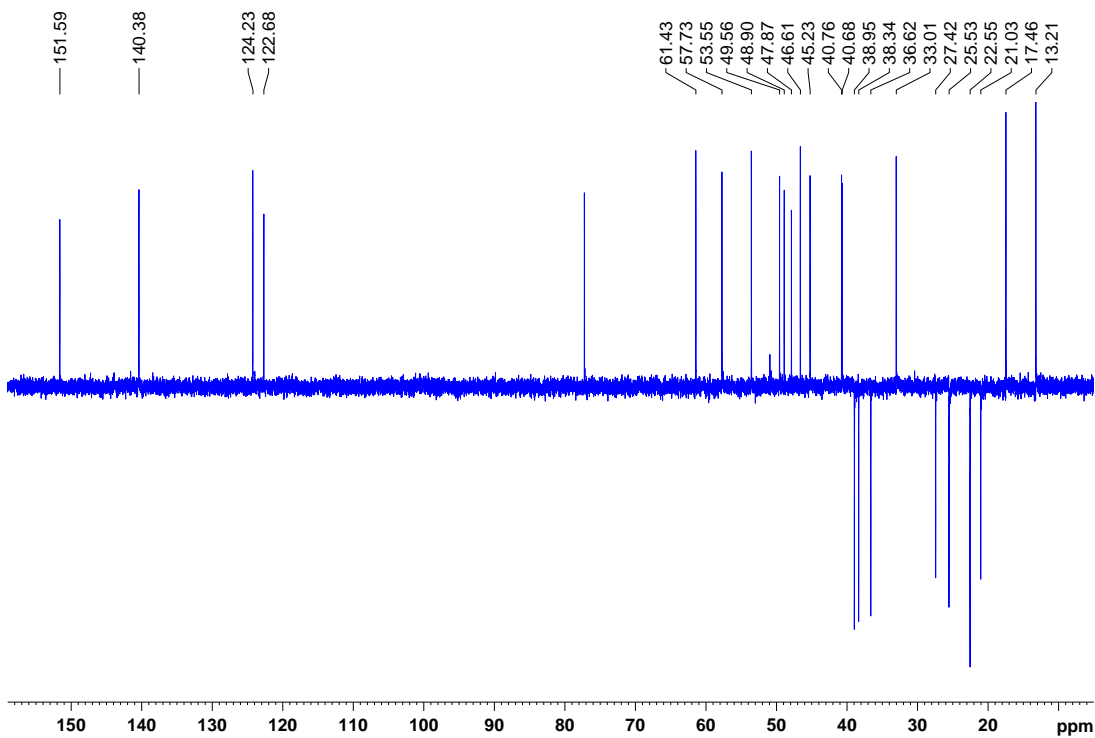

**Figure S29.** HSQC (600 MHz,  $\text{CDCl}_3$ ) of **3**.

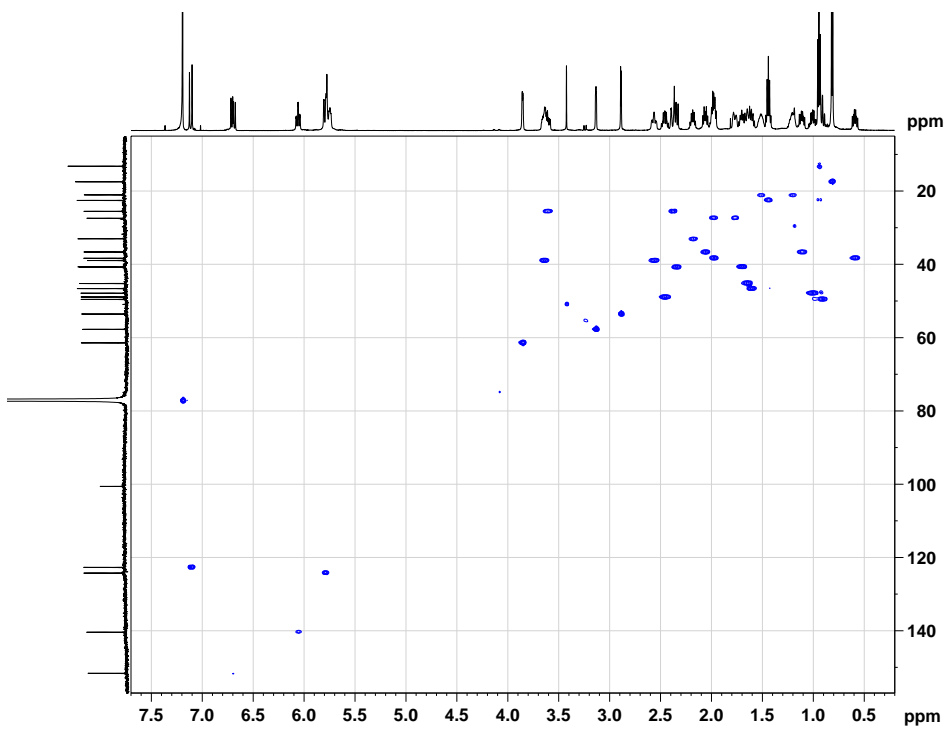

**Figure S30.** HMBC (600 MHz, CDCl<sub>3</sub>) of **3**.

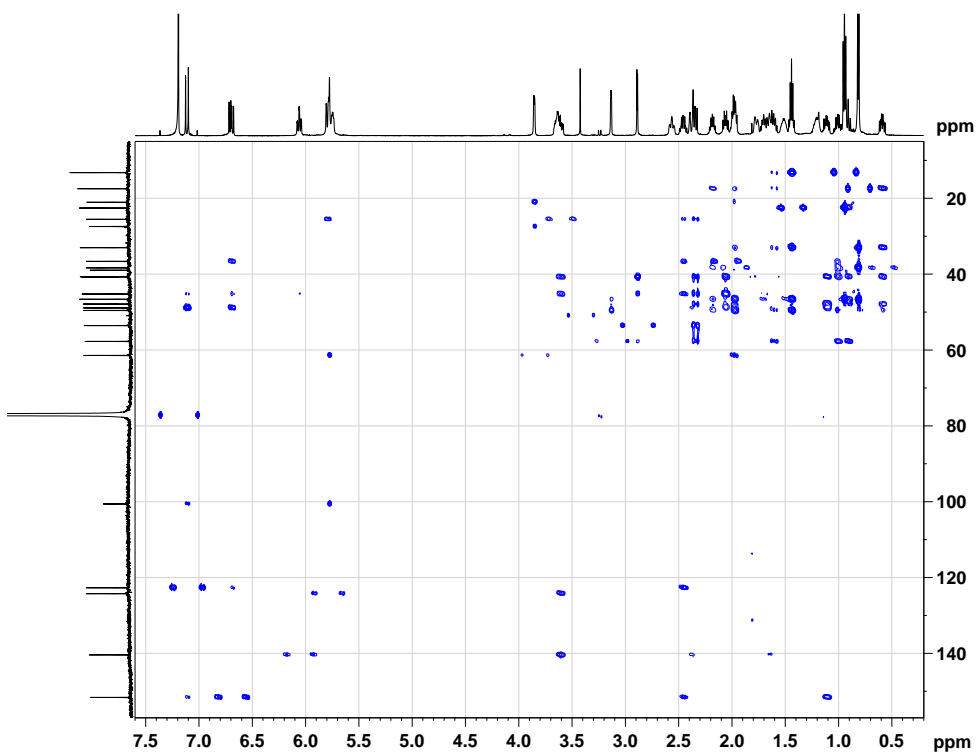

**Figure S31.** COSY (600 MHz, CDCl<sub>3</sub>) of **3**.

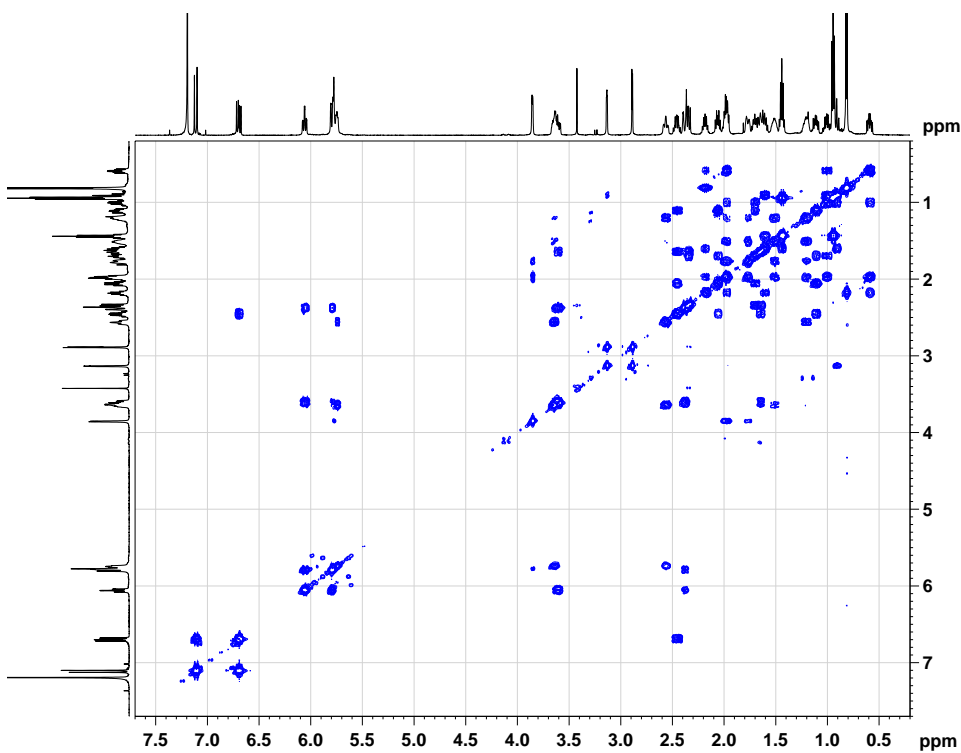



**Figure S32. NOESY (600 MHz, CDCl<sub>3</sub>) of 3.**

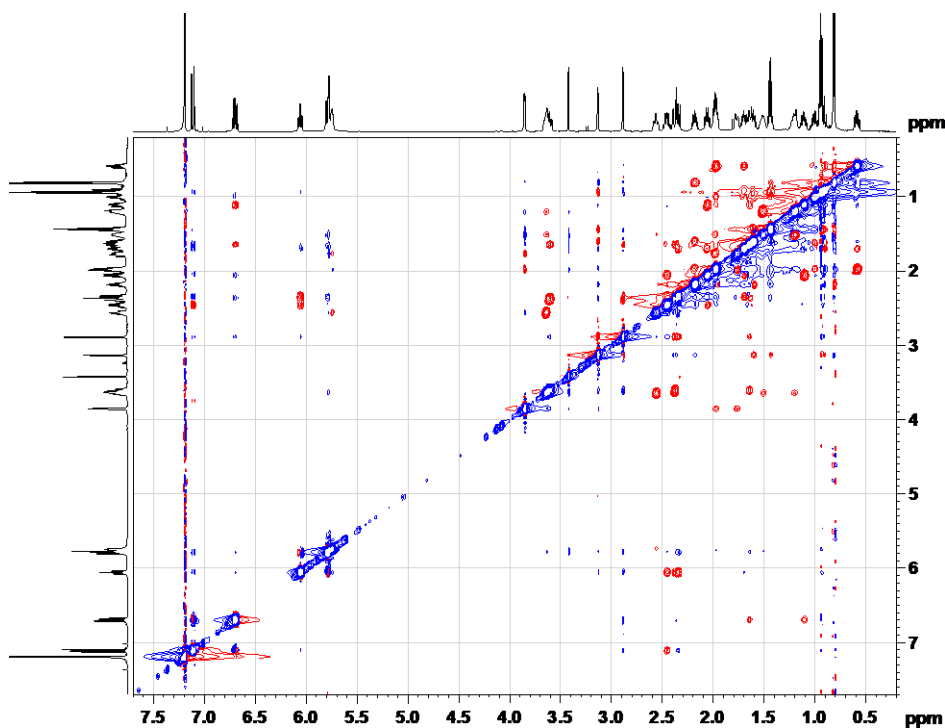

**Figure S33. HRESIMS of 4 (Positive mode).**

**Elemental Composition Report**

Page 1

**Single Mass Analysis**

Tolerance = 5.0 mDa / DBE: min = -1.5, max = 50.0  
 Element prediction: Off  
 Number of isotope peaks used for i-FIT = 3

Monoisotopic Mass, Even Electron Ions

195 formula(e) evaluated with 2 results within limits (up to 50 best isotopic matches for each mass)

Elements Used:

C: 24-35 H: 6-100 N: 2-5 O: 2-20

100-1-12

XMJ\_20151103\_06 218 (4.683) Cm (218)

1: TOF MS ES+  
1.83e+004

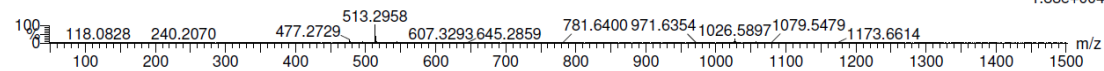

Minimum: -1.5  
 Maximum: 5.0 10.0 50.0

| Mass     | Calc. Mass | mDa  | PPM  | DBE  | i-FIT | Norm  | Conf (%) | Formula                                                       |
|----------|------------|------|------|------|-------|-------|----------|---------------------------------------------------------------|
| 513.2958 | 513.2965   | -0.7 | -1.4 | 10.5 | 26.3  | 0.044 | 95.72    | C <sub>29</sub> H <sub>41</sub> N <sub>2</sub> O <sub>6</sub> |
|          | 513.2924   | 3.4  | 6.6  | 6.5  | 29.4  | 3.151 | 4.28     | C <sub>24</sub> H <sub>41</sub> N <sub>4</sub> O <sub>8</sub> |

**Table S5.**  $^1\text{H}$  (600 MHz) and  $^{13}\text{C}$  (150 MHz) spectroscopic data of **4**.

| Position | $\delta_{\text{C}}$ , type | $\delta_{\text{H}}$ (multi., $J$ in Hz)         | HMBC (correlations from H to C) |
|----------|----------------------------|-------------------------------------------------|---------------------------------|
| 1        | 197.5, C                   |                                                 |                                 |
| 2        | 61.8, CH                   | 3.79, dd (5.5, 2.1)                             | 1, 3, 4, 27                     |
| 3        | 27.5, CH <sub>2</sub>      | 1.71, m<br>1.96, m                              | 1, 2, 4, 5                      |
| 4        | 21.3, CH <sub>2</sub>      | 1.06, m<br>1.51, m                              | 3, 5                            |
| 5        | 39.2, CH <sub>2</sub>      | 2.54, br t (11.5)<br>3.50, ddd (11.5, 4.6, 2.9) | 3, 4, 7                         |
| 6-NH     |                            |                                                 |                                 |
| 7        | 167.7, C                   |                                                 |                                 |
| 8        | 123.6, CH                  | 5.75, dd (11.6, 1.9)                            | 7, 10                           |
| 9        | 142.3, CH                  | 5.99, dd (11.6, 3.1)                            | 7, 11                           |
| 10       | 26.9, CH <sub>2</sub>      | 2.40, ddd (17.5, 3.0, 3.0)<br>3.29, m           | 8, 9, 11, 12                    |
| 11       | 46.0, CH                   | 1.97, m                                         | 12, 20, 22                      |
| 12       | 46.6, CH                   | 1.91, dd (10.6, 4.0)                            | 11, 13, 14, 19, 20              |
| 13       | 74.6, CH                   | 3.72, br t (3.8)                                | 12, 14, 15, 19, 20              |
| 14       | 72.1, CH                   | 3.74, br t (3.8)                                | 12, 13, 15                      |
| 15       | 48.0, CH                   | 1.38, dd (11.0, 3.6)                            | 16, 19, 30                      |
| 16       | 42.5, CH                   | 1.68, m                                         | 17, 18, 20, 29, 31              |
| 17       | 33.3, CH                   | 2.10, m                                         | 15, 16, 18, 19, 29              |
| 18       | 39.5, CH <sub>2</sub>      | 0.61, m<br>2.05, dd (12.3, 7.5)                 | 15, 16, 17, 19, 20, 29          |
| 19       | 41.0, CH                   | 1.51, m                                         | 18, 20                          |
| 20       | 43.5, CH                   | 1.90, m                                         | 13, 18, 19                      |
| 21       | 36.1, CH <sub>2</sub>      | 1.20, m<br>1.99, m                              | 11, 19, 20, 22                  |
| 22       | 49.9, CH                   | 2.33, m                                         | 11, 21, 23, 24                  |
| 23       | 153.4, CH                  | 6.75, dd (15.4, 10.3)                           | 11, 21, 22, 25                  |
| 24       | 122.3, CH                  | 7.03, d (15.4)                                  | 22, 23, 25, 26                  |
| 25       | 173.7, C                   |                                                 |                                 |
| 26       | 101.0, C                   |                                                 |                                 |
| 27       | 175.8, C                   |                                                 |                                 |
| 28-NH    |                            |                                                 |                                 |
| 29       | 17.6, CH <sub>3</sub>      | 0.81, d (7.0)                                   | 16, 17, 18                      |
| 30       | 21.9, CH <sub>2</sub>      | 1.27, m                                         | 16, 17, 31                      |
| 31       | 13.0, CH <sub>3</sub>      | 0.86, t (7.38)                                  | 16, 30                          |

Measured in 90%  $\text{CDCl}_3/\text{CD}_3\text{OD}$ .  $\delta$  values are given in ppm.

**Figure S34.**  $^1\text{H}$  NMR (600 MHz, MeOD/ $\text{CDCl}_3$ ) spectrum of **4**.

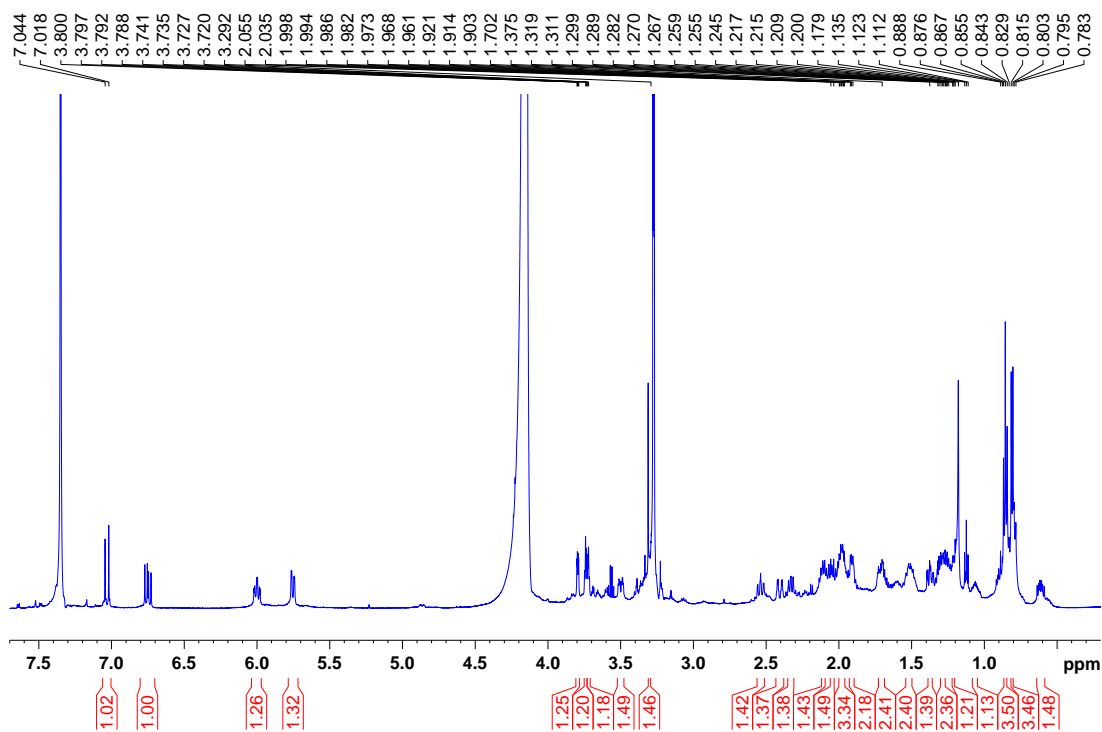

**Figure S35.**  $^{13}\text{C}$  NMR (600 MHz, MeOD/ $\text{CDCl}_3$ ) spectrum of **4**.

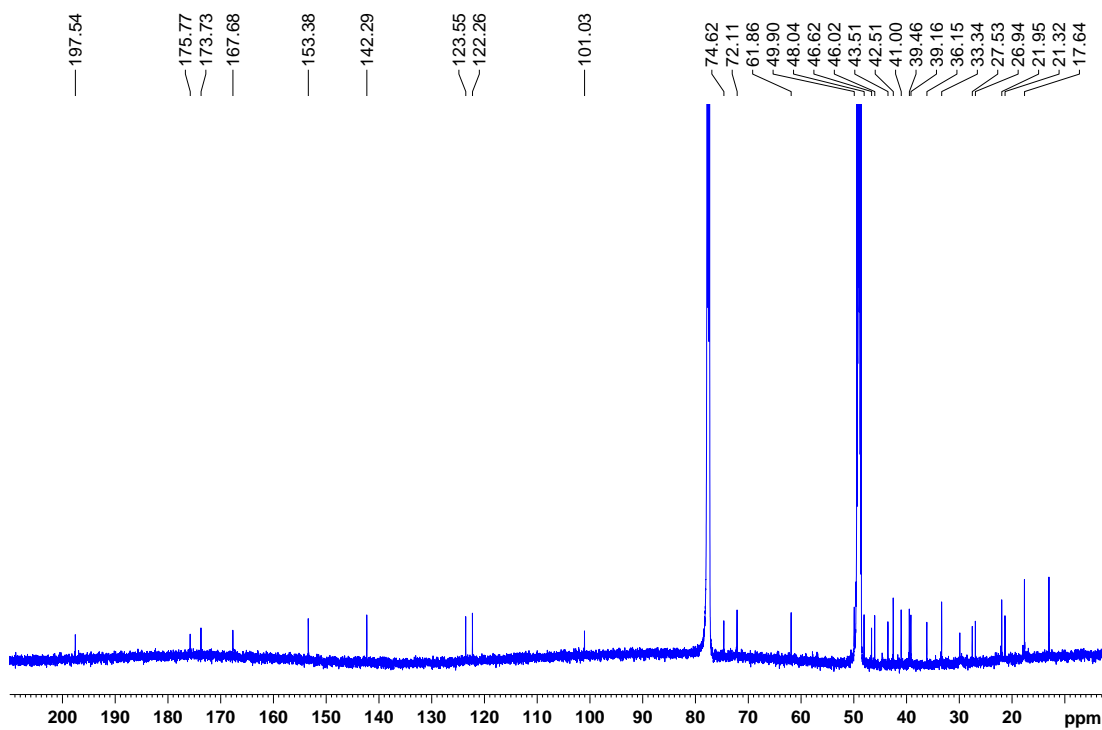

**Figure S36.**  $^{13}\text{C}$ -DEPT NMR (600 MHz, MeOD/ $\text{CDCl}_3$ ) spectrum of **4**.

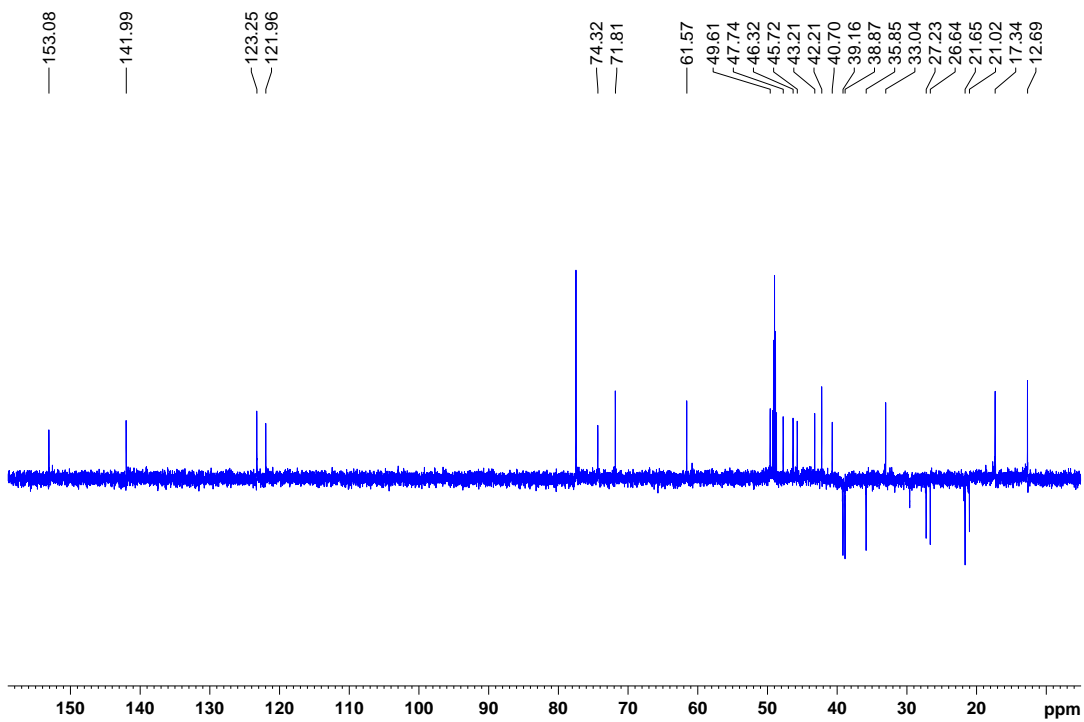

**Figure S37.** HSQC (600 MHz, MeOD/ $\text{CDCl}_3$ ) of **4**.

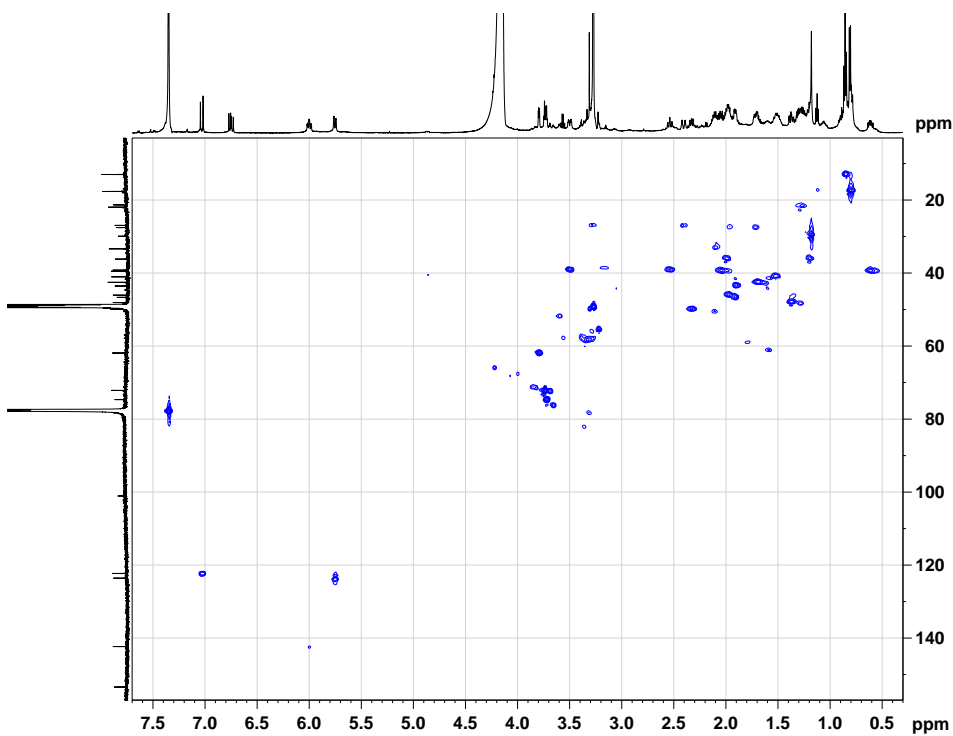

**Figure S38.** HMBC (600 MHz, MeOD/CDCl<sub>3</sub>) of **4**.

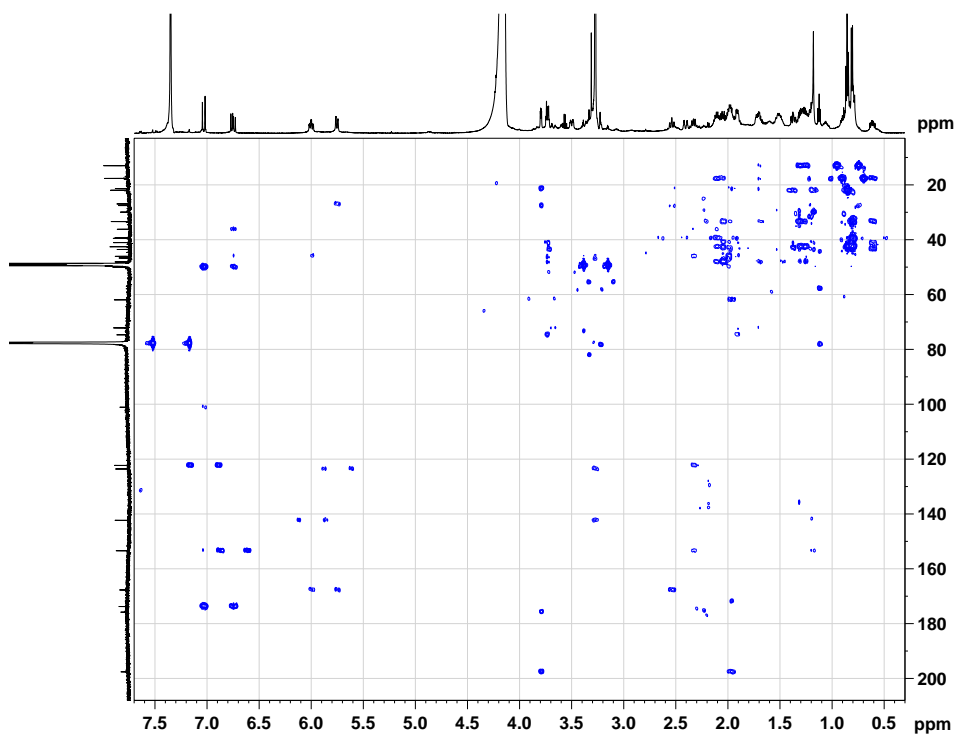

**Figure S39.** COSY (600 MHz, MeOD/CDCl<sub>3</sub>) of **4**.

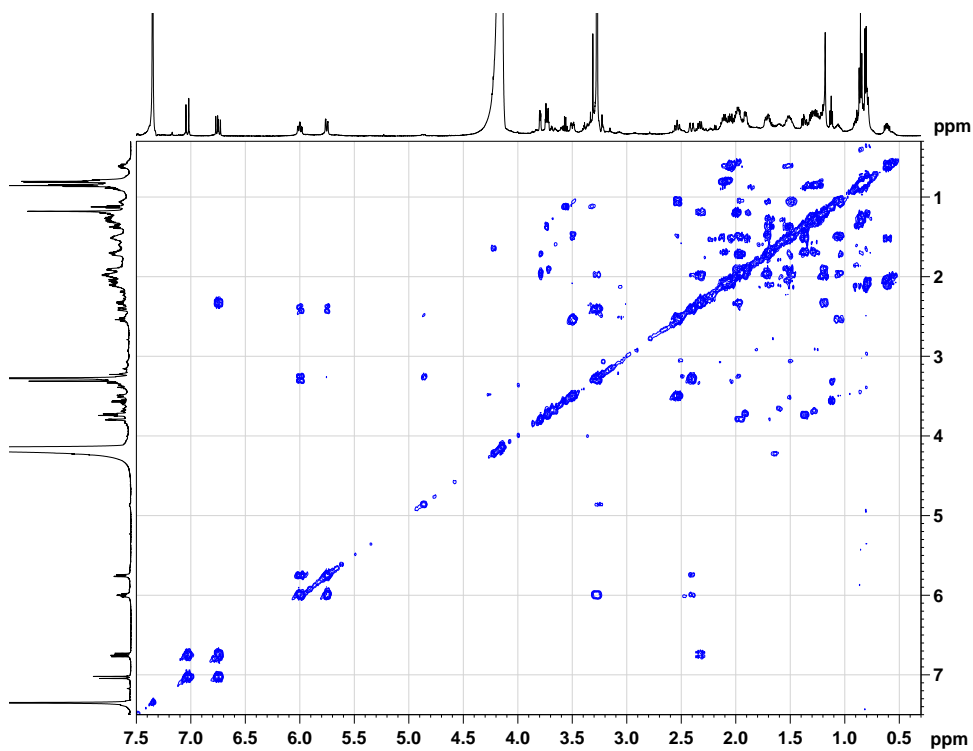

**Figure S40.** TOCSY (600 MHz, MeOD/ $\text{CDCl}_3$ ) of **4**.

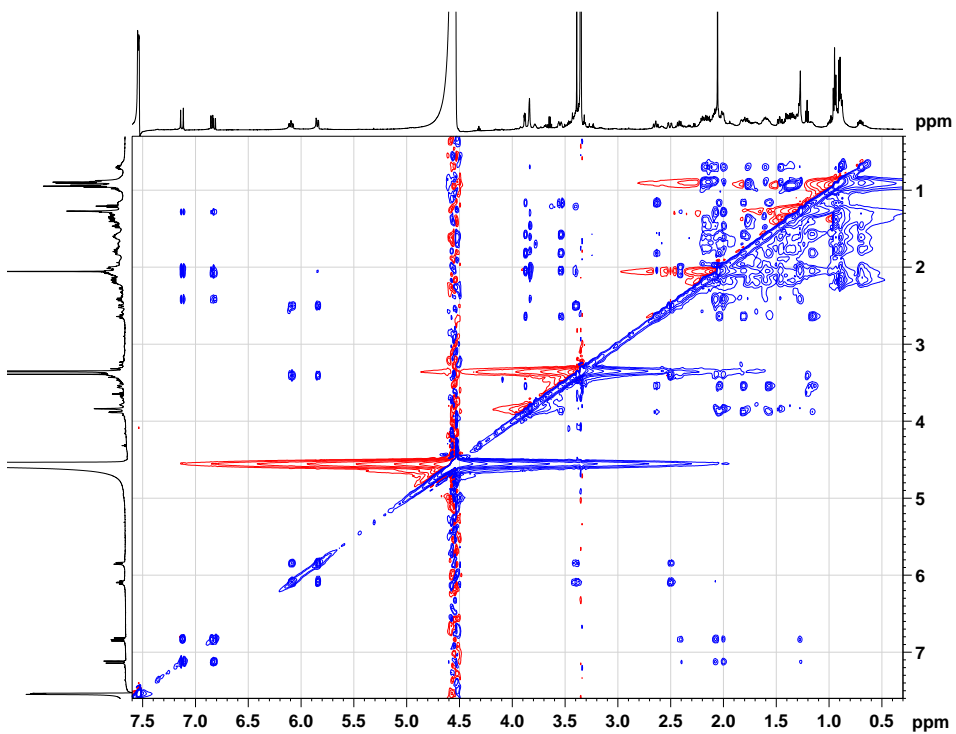

**Figure S41-a.** NOESY (600 MHz, MeOD/ $\text{CDCl}_3$ ) of **4**.

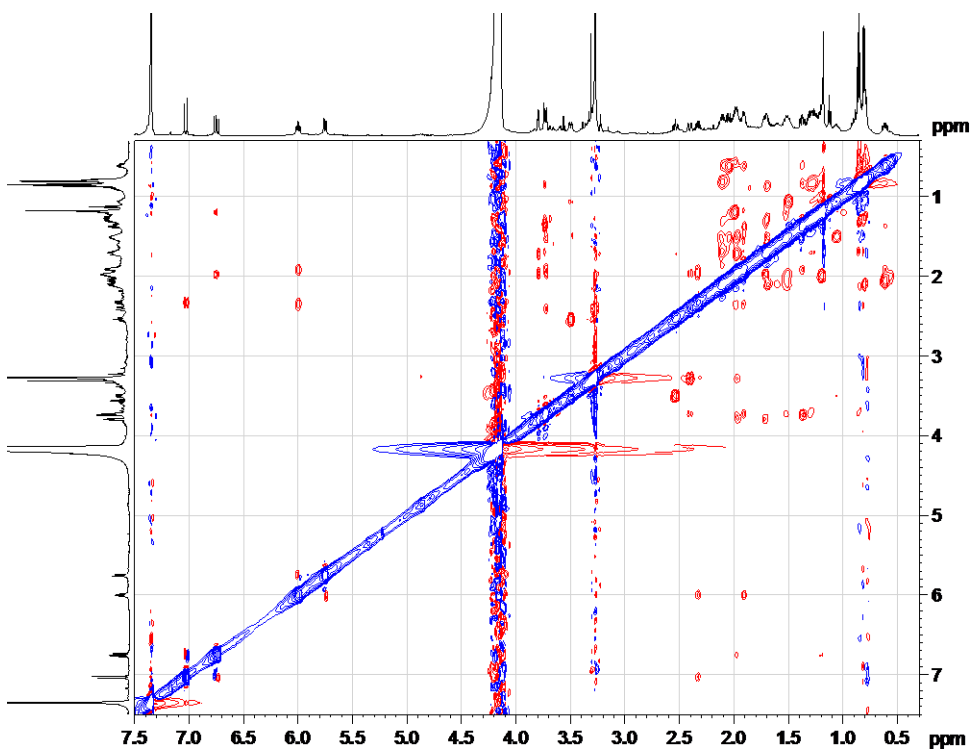

**Figure S41-b.** ROESY (600 MHz, MeOD/ $\text{CDCl}_3$ ) of **4**.

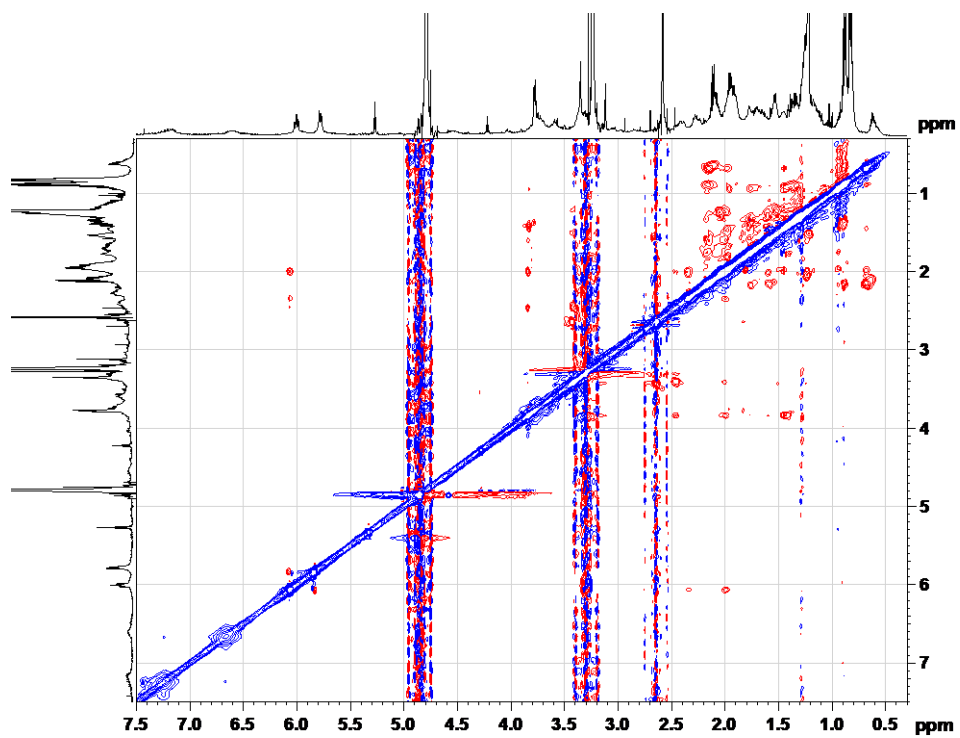

**Figure S42-a. FT-MS of 5 (Positive mode).**

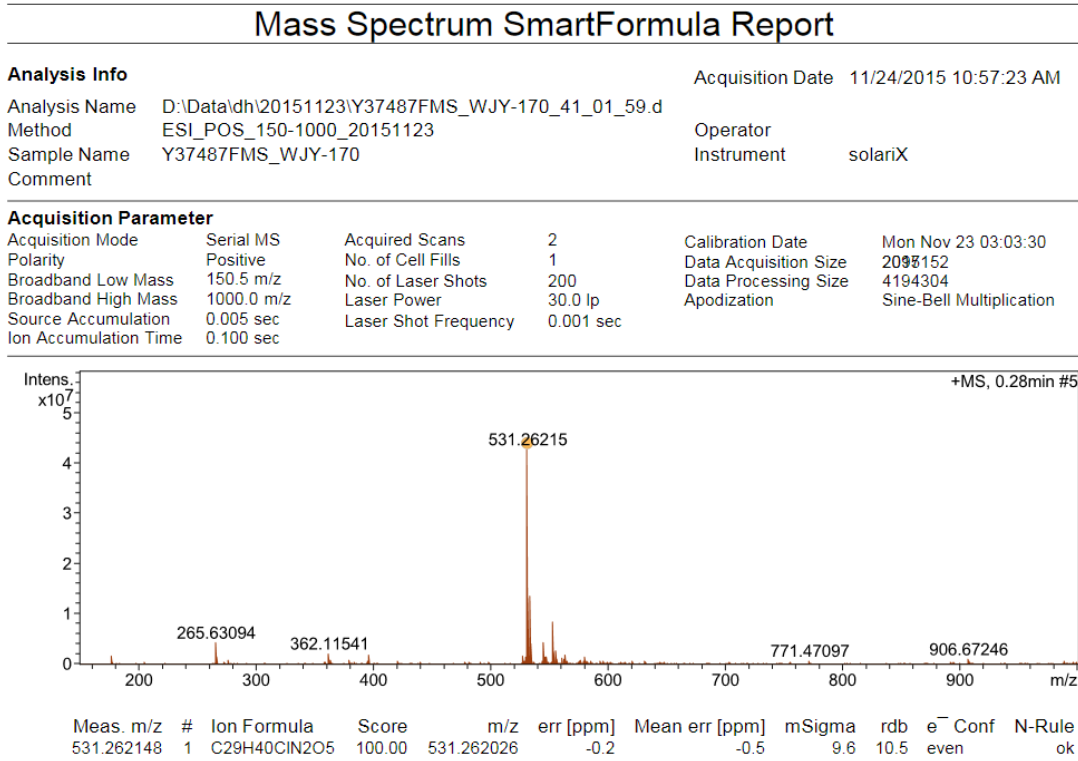

**Figure S42-b. HR-MS of 5 (Positive mode).**

**Elemental Composition Report**

**Single Mass Analysis**

Tolerance = 5.0 PPM / DBE: min = -1.5, max = 50.0  
 Element prediction: Off  
 Number of isotope peaks used for i-FIT = 3

Monoisotopic Mass, Even Electron Ions

975 formula(e) evaluated with 5 results within limits (up to 50 best isotopic matches for each mass)

Elements Used:

C: 0-35 H: 0-100 N: 0-5 O: 0-10 Cl: 0-2

WJY-170

XMJ\_20151028\_03 282 (6.059) Cm (280:282)

1: TOF MS ES+  
5.82e+004

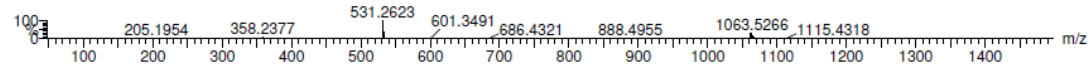

Minimum: -1.5  
 Maximum: 5.0 5.0 50.0

| Mass     | Calc. Mass | mDa  | PPM  | DBE  | i-FIT | Norm   | Conf (%) | Formula           |
|----------|------------|------|------|------|-------|--------|----------|-------------------|
| 531.2623 | 531.2626   | -0.3 | -0.6 | 10.5 | 213.8 | 0.000  | 99.99    | C29 H40 N2 O5 Cl1 |
|          | 531.2644   | -2.1 | -4.0 | 5.5  | 222.9 | 9.114  | 0.01     | C28 H45 O5 Cl2    |
|          | 531.2604   | 1.9  | 3.6  | 1.5  | 224.2 | 10.366 | 0.00     | C23 H45 N2 O7 Cl2 |
|          | 531.2607   | 1.6  | 3.0  | 15.5 | 226.3 | 12.483 | 0.00     | C30 H35 N4 O5     |
|          | 531.2648   | -2.5 | -4.7 | 19.5 | 226.4 | 12.622 | 0.00     | C35 H35 N2 O3     |



**Table S6.**  $^1\text{H}$  (600 MHz) and  $^{13}\text{C}$  (150 MHz) spectroscopic data of **5**.

| Position | $\delta_{\text{C}}$ , type | $\delta_{\text{H}}$ (multi., $J$ in Hz)         | HMBC (correlations from H to C) |
|----------|----------------------------|-------------------------------------------------|---------------------------------|
| 1        | 197.1, C                   |                                                 |                                 |
| 2        | 61.6, CH                   | 3.88, dd (5.5, 2.1)                             | 1, 3, 4, 27                     |
| 3        | 27.5, CH <sub>2</sub>      | 1.82, m<br>2.05, m                              | 1, 2, 4, 5                      |
| 4        | 21.1, CH <sub>2</sub>      | 1.18, m<br>1.62, m                              |                                 |
| 5        | 39.0, CH <sub>2</sub>      | 2.65, br t (11.2)<br>3.55, ddd (11.2, 4.9, 3.0) | 3, 4, 7                         |
| 6-NH     |                            |                                                 |                                 |
| 7        | 167.2, C                   |                                                 |                                 |
| 8        | 123.7, CH                  | 5.84, dd (11.5, 1.3)                            | 7, 10                           |
| 9        | 141.6, CH                  | 6.06, ddd (11.5, 11.5, 3.4)                     | 7, 10, 11                       |
| 10       | 26.4, CH <sub>2</sub>      | 2.53, dd (17.3, 3.0)<br>3.38, m                 | 8, 9, 11, 22                    |
| 11       | 45.6, CH                   | 2.14, m                                         | 12, 20, 22                      |
| 12       | 47.3, CH                   | 2.07, m*                                        | 13, 14, 20                      |
| 13       | 73.7, CH                   | 4.13, br t (2.6)                                | 11, 14, 20                      |
| 14       | 64.7, CH                   | 4.23, br t (2.9)                                | 13, 15, 19                      |
| 15       | 47.0, CH                   | 1.77, m                                         | 14, 17, 20                      |
| 16       | 44.7, CH                   | 1.76, d (3.3)                                   | 14, 15, 30                      |
| 17       | 32.6, CH                   | 2.21, m                                         | 15, 16, 18, 19, 29              |
| 18       | 38.6, CH <sub>2</sub>      | 0.75, m<br>2.19, d (7.6)                        | 15, 16, 17, 19, 20, 29          |
| 19       | 41.1, CH                   | 1.61, m                                         | 12, 15, 20                      |
| 20       | 42.6, CH                   | 2.07, m*                                        | 13, 18, 19                      |
| 21       | 35.6, CH <sub>2</sub>      | 1.29, m<br>2.13, dd (7.6, 4.8)                  | 11, 12, 20, 22                  |
| 22       | 49.6, CH                   | 2.41, m                                         | 11, 21, 23, 24, 25              |
| 23       | 153.0, CH                  | 6.83, dd (15.4, 10.3)                           | 11, 21, 22, 24, 25              |
| 24       | 122.2, CH                  | 7.13, d (15.4)                                  | 22, 23, 25, 26                  |
| 25       | 173.6, C                   |                                                 |                                 |
| 26       | 100.8, C                   |                                                 |                                 |
| 27       | 175.6, C                   |                                                 |                                 |
| 28-NH    |                            |                                                 |                                 |
| 29       | 17.7, CH <sub>3</sub>      | 0.90, d (6.8)                                   | 16, 17, 18                      |
| 30       | 21.2, CH <sub>2</sub>      | 1.35, m                                         | 16, 17, 31                      |
| 31       | 12.8, CH <sub>3</sub>      | 0.94, t (7.38)                                  | 16, 30                          |

Measured in 90%  $\text{CDCl}_3/\text{CD}_3\text{OD}$ .  $\delta$  values are given in ppm. (\* inseperatable)

**Figure S43.**  $^1\text{H}$  NMR (600 MHz, MeOD/ $\text{CDCl}_3$ ) spectrum of **5**.

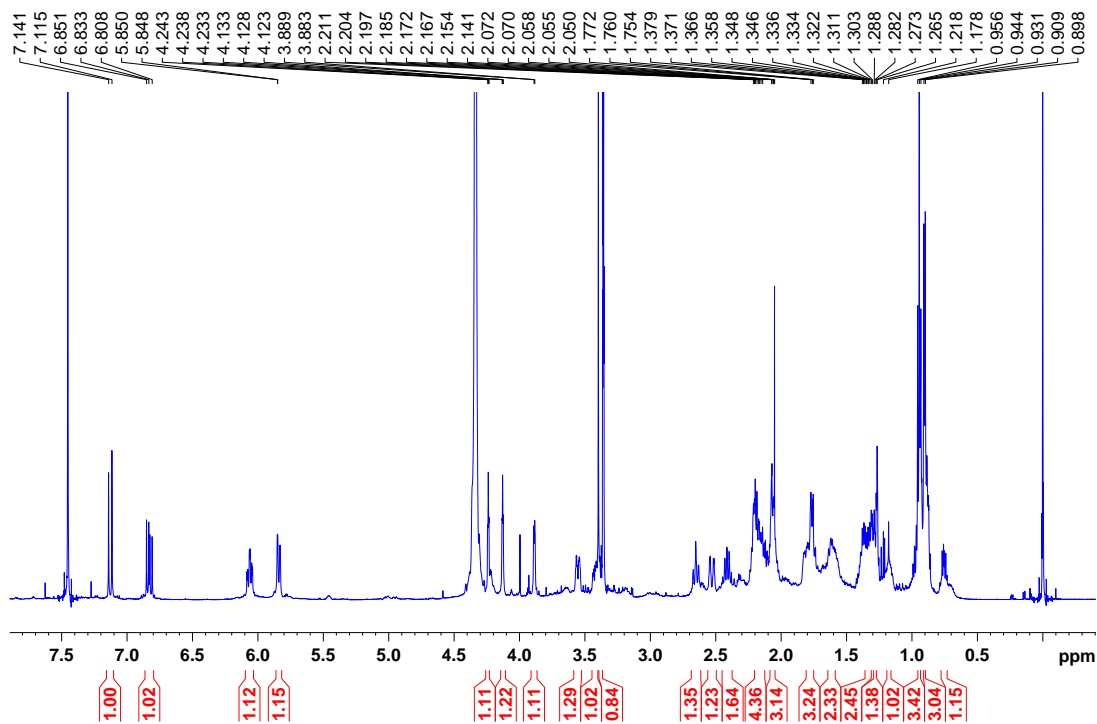

**Figure S44.**  $^{13}\text{C}$  NMR (600 MHz, MeOD/ $\text{CDCl}_3$ ) spectrum of **5**.

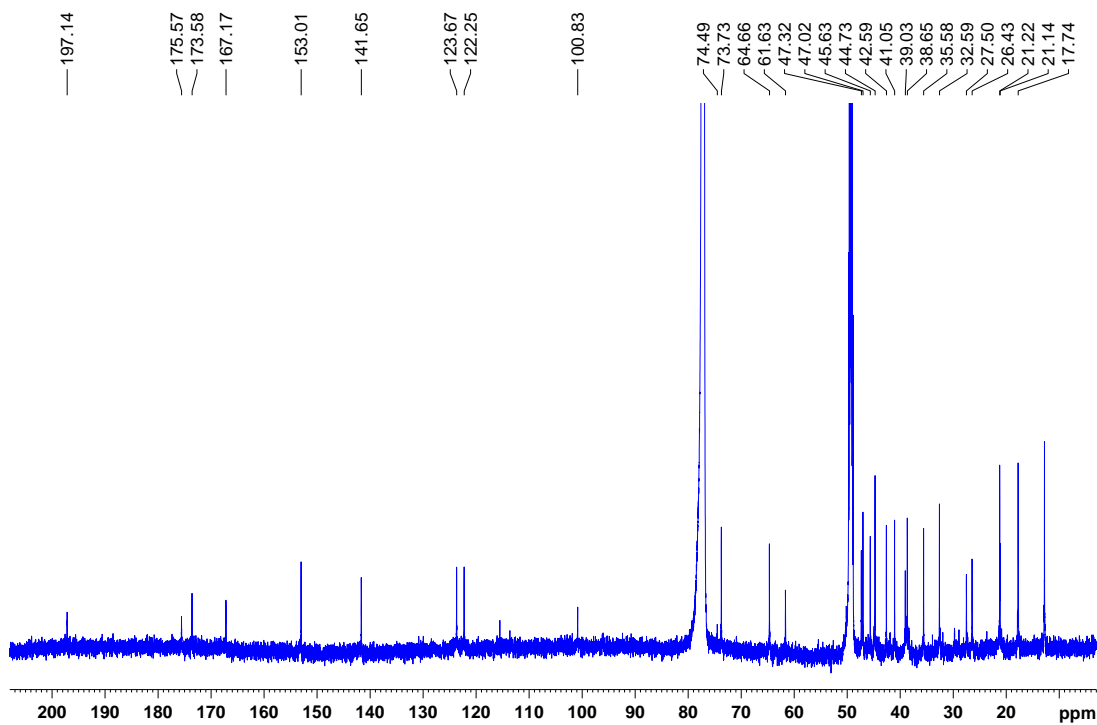

**Figure S45.**  $^{13}\text{C}$ -DEPT NMR (600 MHz, MeOD/ $\text{CDCl}_3$ ) spectrum of **5**.

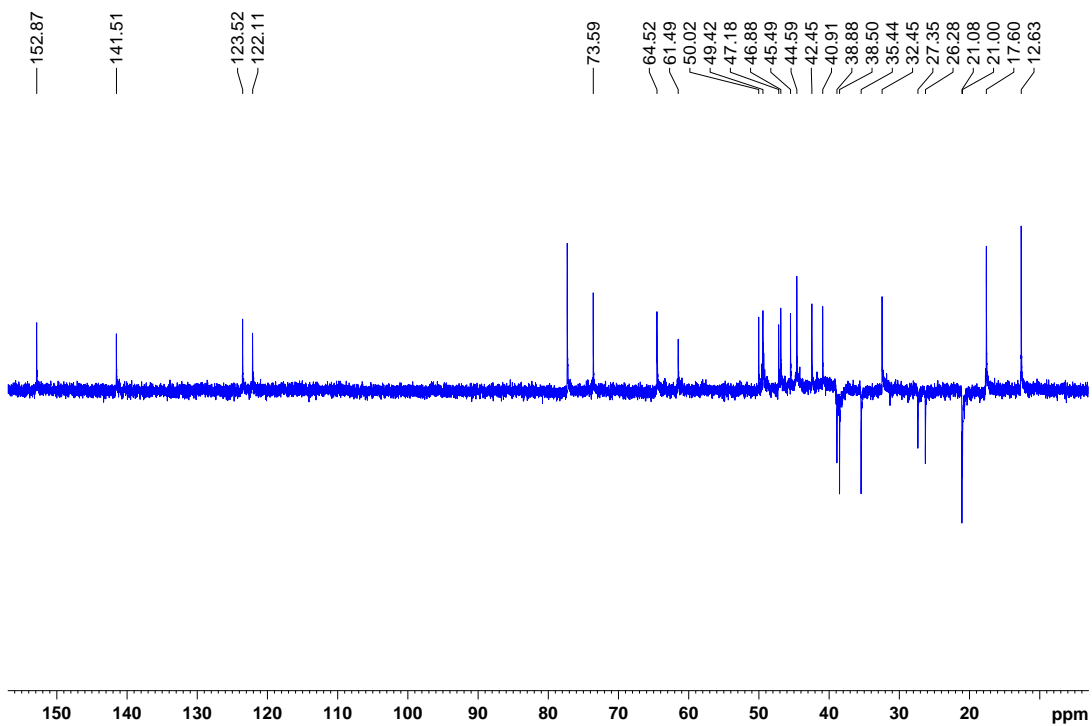

**Figure S46.** HSQC (600 MHz, MeOD/ $\text{CDCl}_3$ ) of **5**.

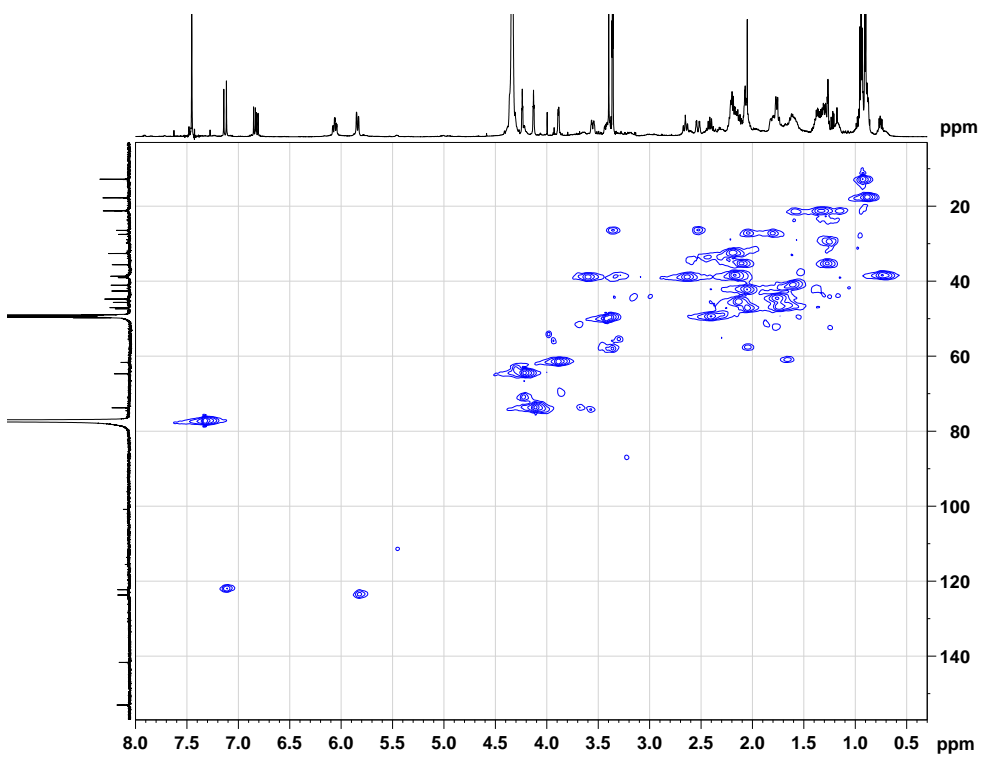

**Figure S47.** HMBC (600 MHz, MeOD/CDCl<sub>3</sub>) of **5**.

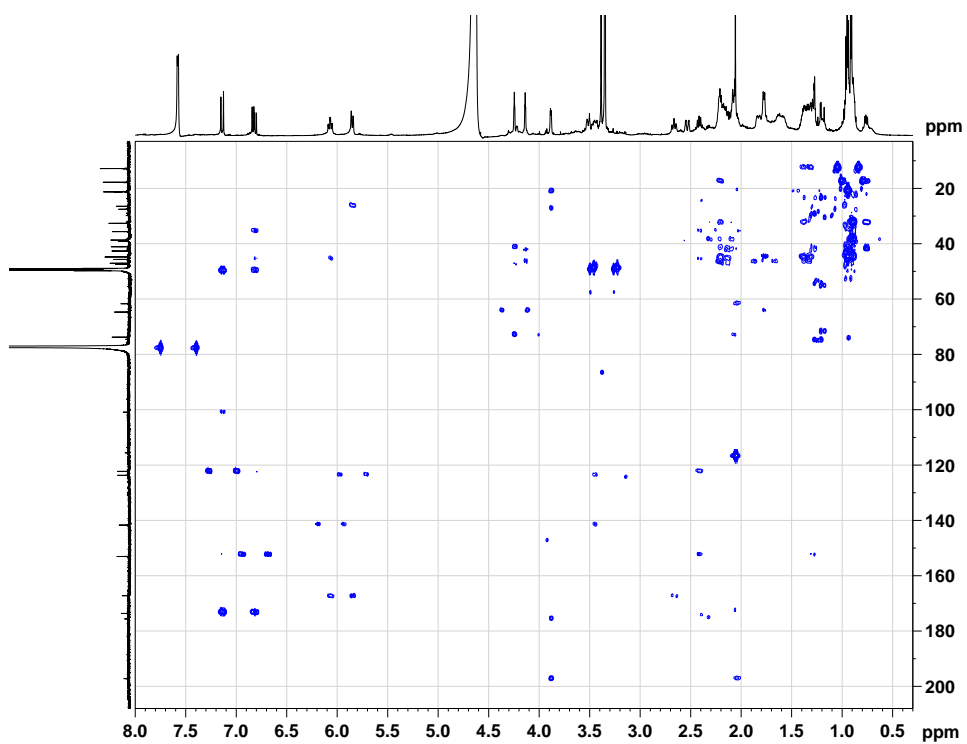

**Figure S48.** COSY (600 MHz, MeOD/CDCl<sub>3</sub>) of **5**.

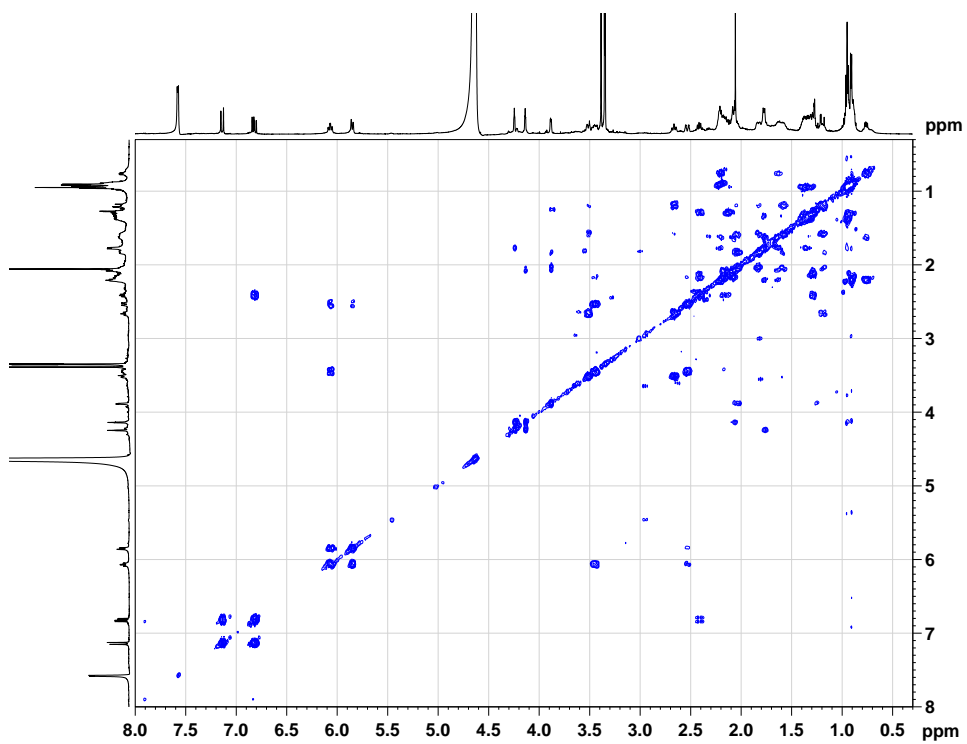

**Figure S49.** TOCSY (600 MHz, MeOD/ $\text{CDCl}_3$ ) of **5**.

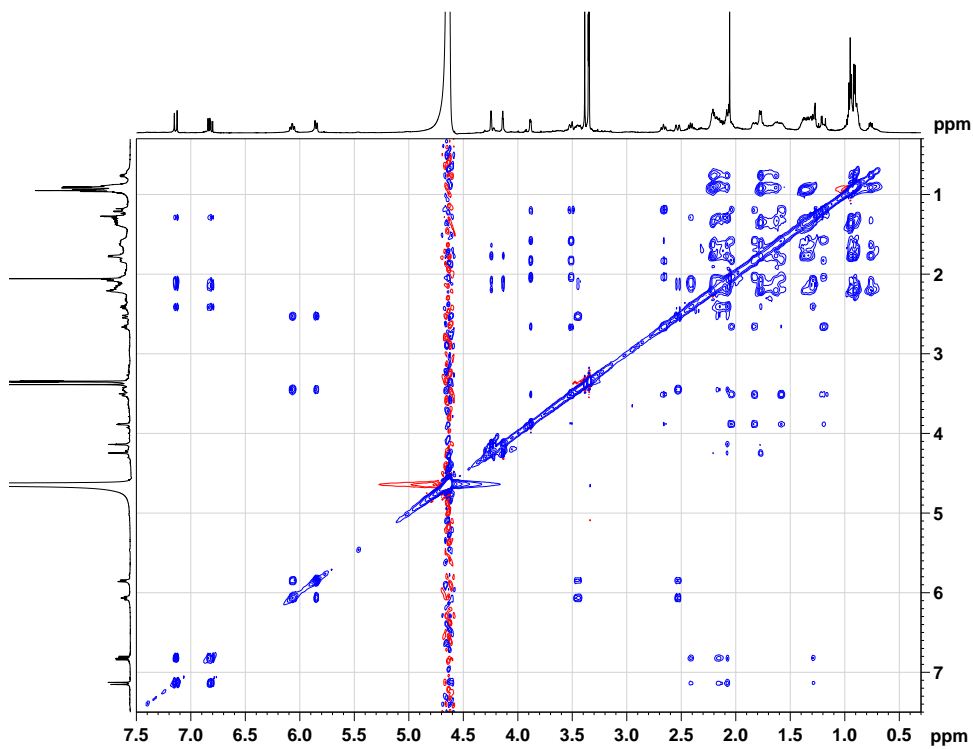

**Figure S50-a.** NOESY (600 MHz, MeOD/ $\text{CDCl}_3$ ) of **5**.

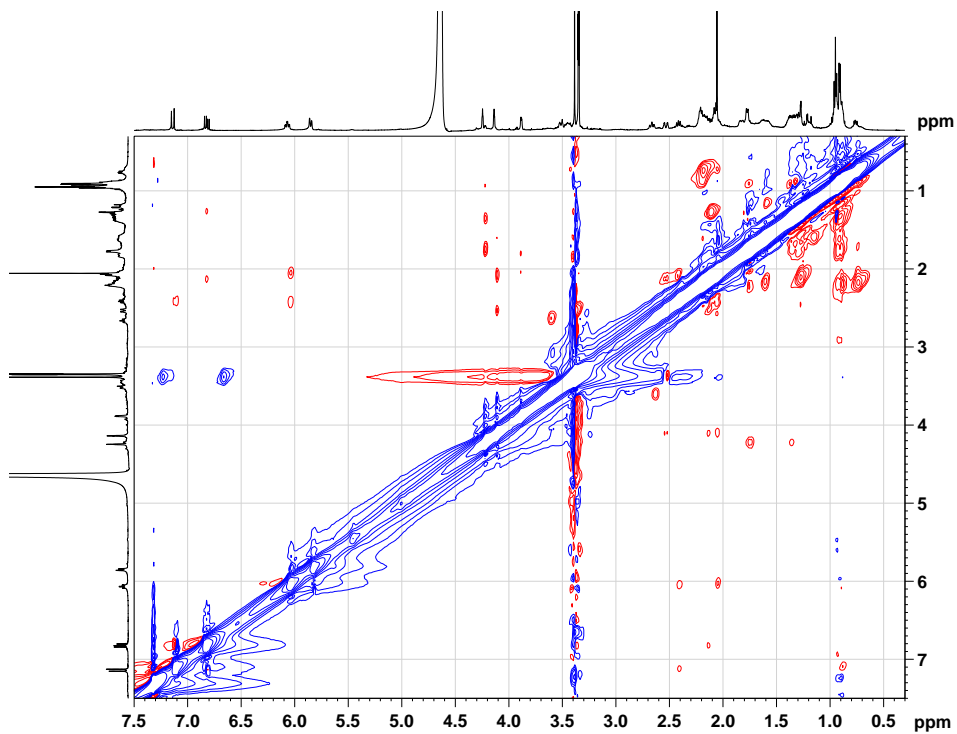

**Figure S50-b. ROESY (600 MHz, MeOD/CDCI<sub>3</sub>) of 5.**

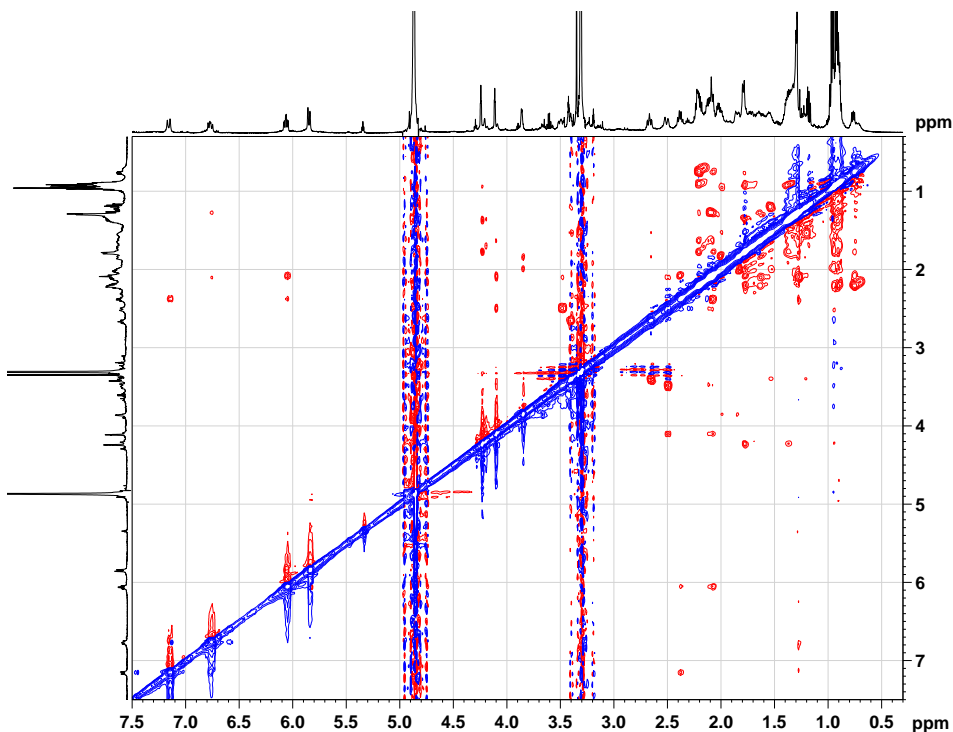

**Figure S51. HRESIMS of 6 (Positive mode).**

**Elemental Composition Report**

Page 1

**Single Mass Analysis**

Tolerance = 5.0 PPM / DBE: min = -1.5, max = 50.0

Element prediction: Off

Number of isotope peaks used for i-FIT = 3

Monoisotopic Mass, Even Electron Ions

201 formula(e) evaluated with 1 results within limits (up to 50 best isotopic matches for each mass)

Elements Used:

C: 0-40 H: 0-50 N: 0-4 O: 0-10

289-AA-main1

XMJ\_20160319\_YHL\_01 220 (4.717) Cm (219:221)

1: TOF MS ES+  
3.73e+004

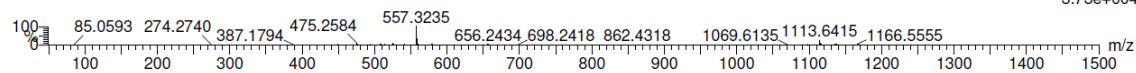

Minimum: -1.5  
Maximum: 5.0 5.0 50.0

| Mass     | Calc. Mass | mDa | PPM | DBE  | i-FIT | Norm | Conf(%) | Formula       |
|----------|------------|-----|-----|------|-------|------|---------|---------------|
| 557.3235 | 557.3227   | 0.8 | 1.4 | 10.5 | 228.6 | n/a  | n/a     | C31 H45 N2 O7 |

**Table S7.**  $^1\text{H}$  (600 MHz) and  $^{13}\text{C}$  (150 MHz) spectroscopic data of **6**.

| Position | $\delta_{\text{C}}$ , type | $\delta_{\text{H}}$ , multi ( $J$ in Hz) | HMBC (correlations from H to C) |
|----------|----------------------------|------------------------------------------|---------------------------------|
| 1        | 198.2, C                   |                                          |                                 |
| 2        | 62.9, CH                   | 3.85, br d (4.0)                         | 1, 3, 4, 27                     |
| 3        | 28.3, CH <sub>2</sub>      | 1.84, m<br>1.99, m                       | 1, 2, 4, 5                      |
| 4        | 22.0, CH <sub>2</sub>      | 1.18, m<br>1.54, m                       | 3, 5                            |
| 5        | 40.0, CH <sub>2</sub>      | 2.66, br t (11.0)<br>3.40, m             | 3, 4, 7                         |
| 6-NH     |                            |                                          |                                 |
| 7        | 168.8, C                   |                                          |                                 |
| 8        | 124.7, CH                  | 5.84, d (11.3)                           | 7, 9, 10                        |
| 9        | 142.6, CH                  | 6.06, td (11.3, 3.8)                     | 7, 10, 11                       |
| 10       | 27.6, CH <sub>2</sub>      | 2.45, d (15.7)<br>3.49, m                | 8, 9, 11                        |
| 11       | 45.9, CH                   | 2.01, m                                  |                                 |
| 12       | 49.6, CH                   | 2.02, m                                  | 13, 19, 20                      |
| 13       | 68.7, CH                   | 4.08, br                                 | 14, 15, 19                      |
| 14       | 83.0, CH                   | 3.46, t (2.7)                            | 12, 13, 15, 33                  |
| 15       | 44.7, CH                   | 1.69, dd (11.2, 2.6)                     | 16, 19, 30                      |
| 16       | 45.9, CH                   | 2.06, m                                  | 14, 15, 17, 19, 30, 31          |
| 17       | 35.0, CH                   | 2.18, m                                  | 16, 18, 29                      |
| 18       | 40.9, CH <sub>2</sub>      | 0.67, m<br>2.03, m                       | 16, 17, 19, 20, 29              |
| 19       | 42.7, CH                   | 1.56, m                                  | 14, 15, 18, 20, 21              |
| 20       | 42.6, CH                   | 2.00, m                                  | 12, 13                          |
| 21       | 36.3, CH <sub>2</sub>      | 1.27, m<br>2.08, m                       | 12, 20, 22                      |
| 22       | 51.2, CH                   | 2.37, m                                  | 10, 11, 21, 23, 24              |
| 23       | 153.0, CH                  | 6.75, dd (15.8, 10.5)                    | 11, 21, 22, 24, 25              |
| 24       | 123.7, CH                  | 7.13, d (15.8)                           | 11, 21, 22, 23, 25, 26          |
| 25       | 174.1, C                   |                                          |                                 |
| 26       | 102.2, C                   |                                          |                                 |
| 27       | 176.9, C                   |                                          |                                 |
| 28-NH    |                            |                                          |                                 |
| 29       | 18.4, CH <sub>3</sub>      | 1.00, d (7.1)                            | 16, 17, 18                      |
| 30       | 79.1, CH                   | 3.39, m                                  | 16, 17, 31, 32                  |
| 31       | 18.0, CH <sub>3</sub>      | 1.20, d (6.1)                            | 16, 30                          |
| 32       | 55.8, CH <sub>3</sub>      | 3.29, s                                  | 30                              |
| 33       | 58.6, CH <sub>3</sub>      | 3.42, s                                  | 14                              |

Measured in CD<sub>3</sub>OD.  $\delta$  values are given in ppm.

**Figure S52.**  $^1\text{H}$  NMR (600 MHz, MeOD) spectrum of **6**.

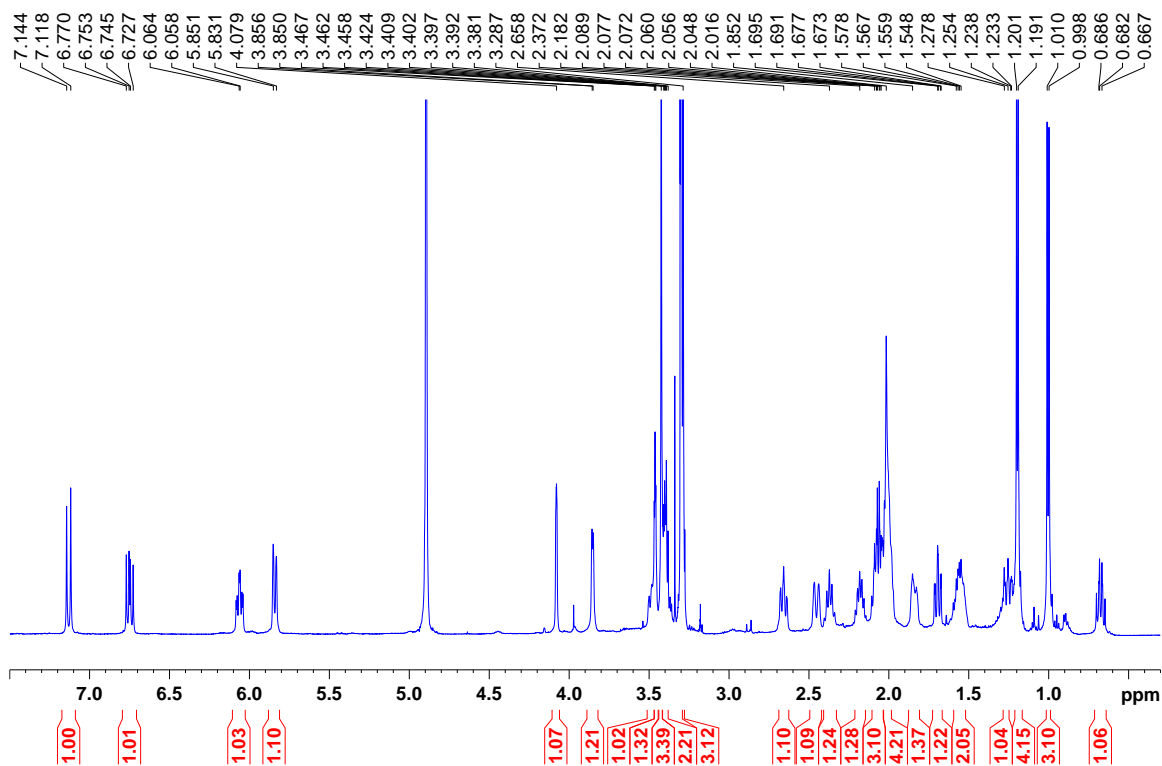

**Figure S53.**  $^{13}\text{C}$  NMR (600 MHz, MeOD) spectrum of **6**.

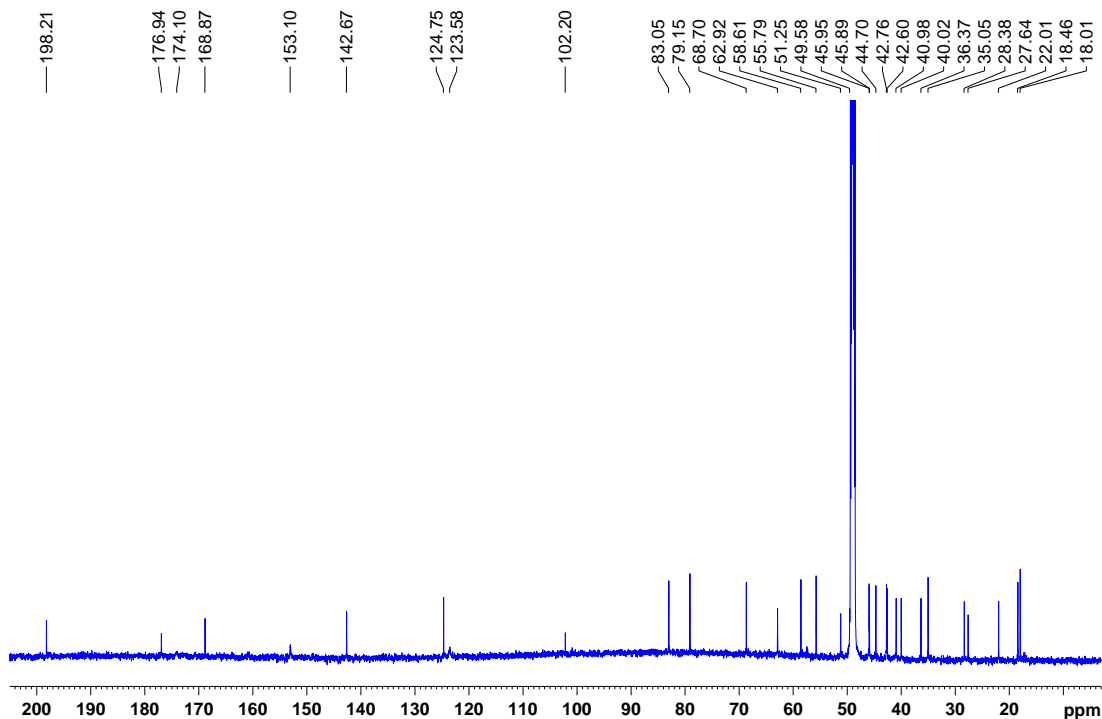



**Figure S54.**  $^{13}\text{C}$ -DEPT NMR (600 MHz, MeOD) spectrum of **6**.

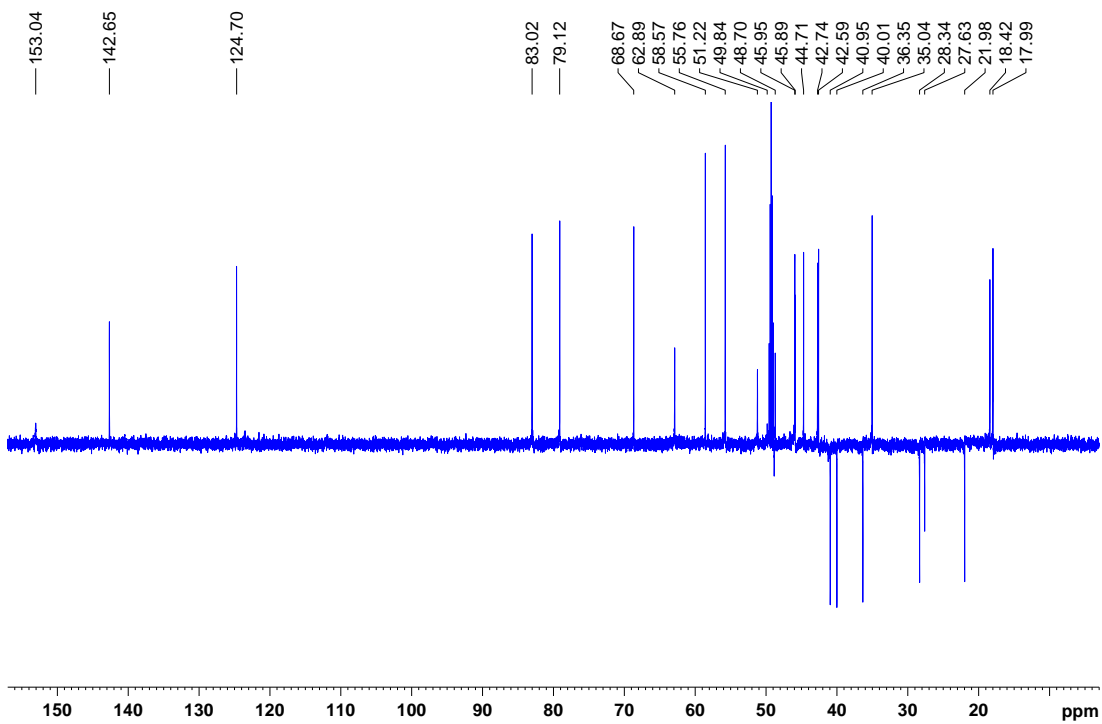

**Figure S55.** HSQC (600 MHz, MeOD) of **6**.

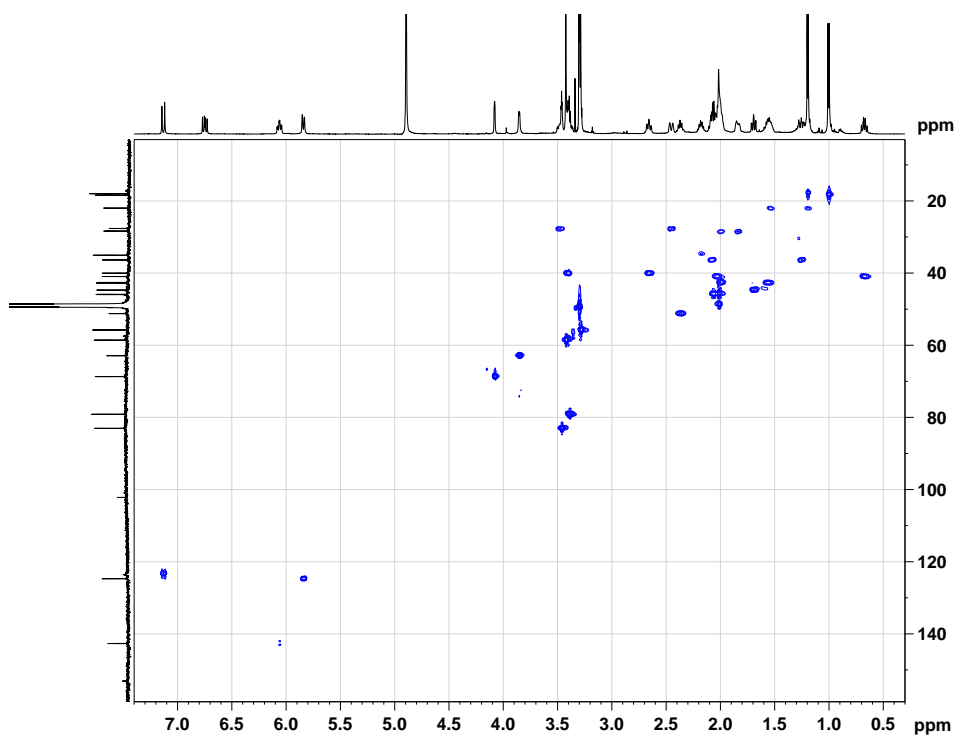

**Figure S56.** HMBC (600 MHz, MeOD) of **6**.

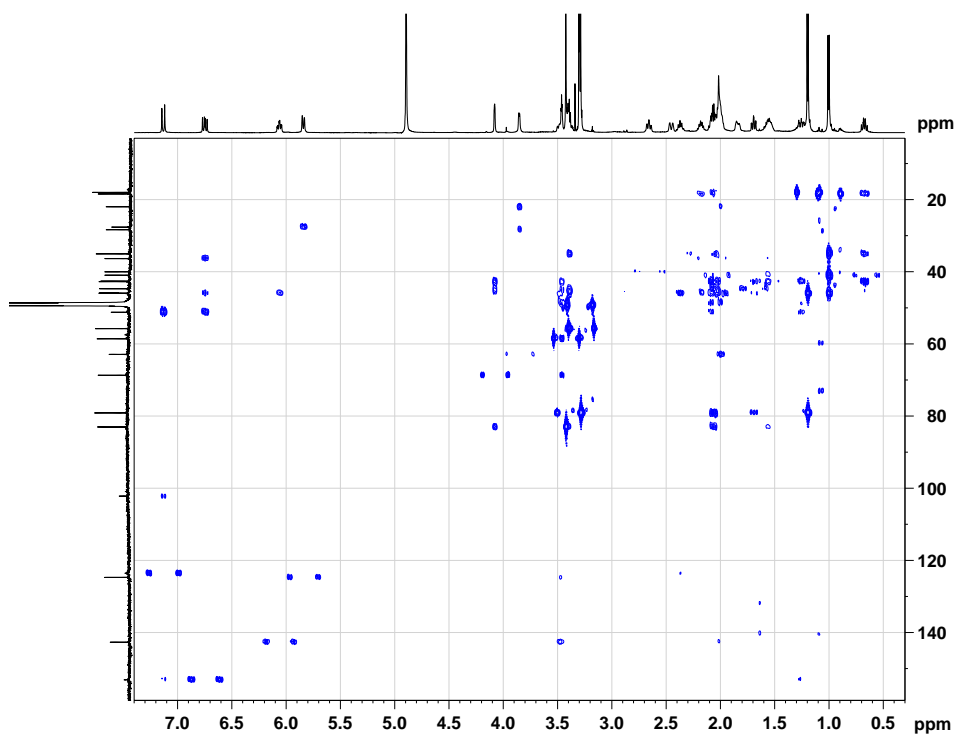

**Figure S57.** COSY (600 MHz, MeOD) of **6**.

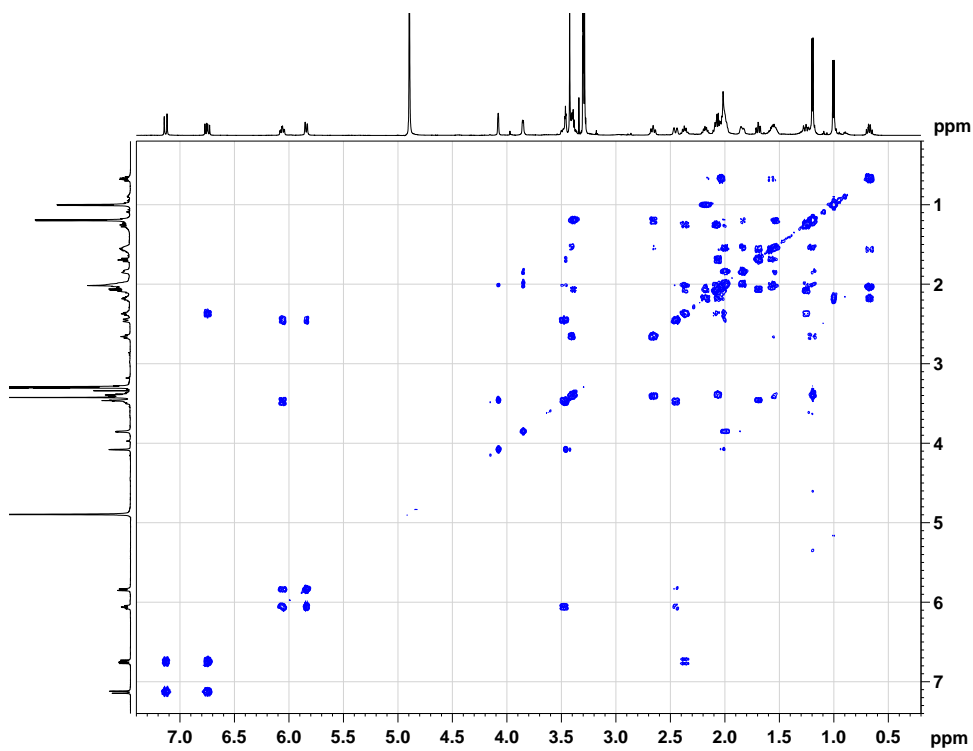

**Figure S58-a.** NOESY (600 MHz, MeOD) of **6**.

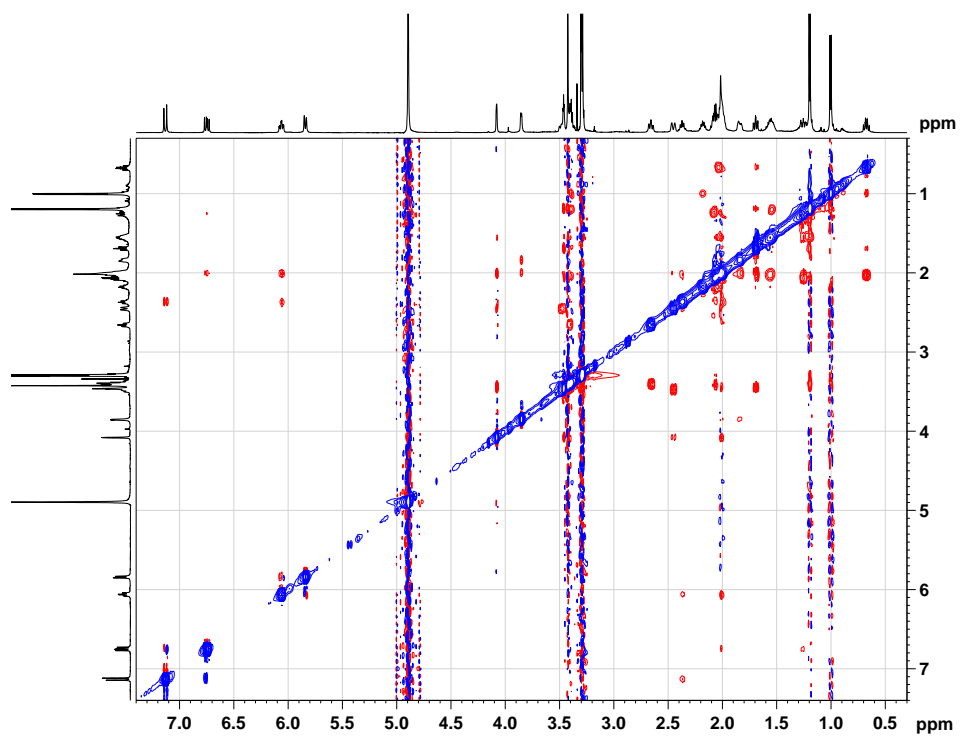

**Figure S58-b.** ROESY (600 MHz, MeOD) of **6**.

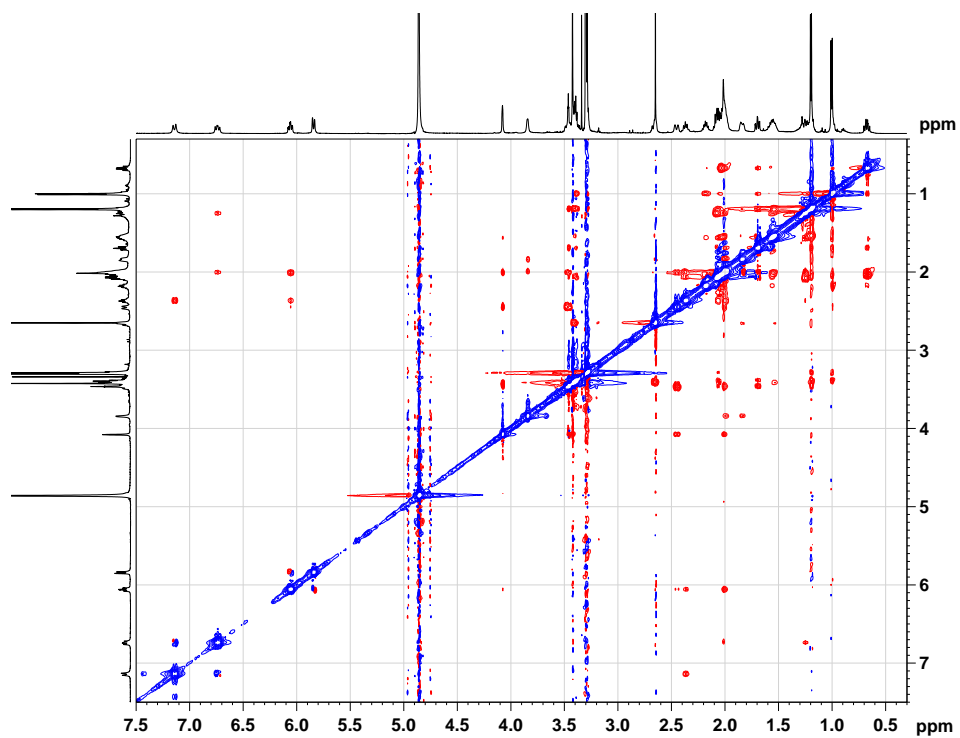

**Table S8.**  $^1\text{H}$  (600 MHz) and  $^{13}\text{C}$  (150 MHz) spectroscopic data of **7**.

| Position | $\delta_{\text{C}}$ , type | $\delta_{\text{H}}$ , multi ( $J$ in Hz) | HMBC (correlations from H to C) |
|----------|----------------------------|------------------------------------------|---------------------------------|
| 1        | 198.2, C                   |                                          |                                 |
| 2        | 62.9, CH                   | 3.85, br d (3.87)                        | 1, 3, 4, 27                     |
| 3        | 28.3, CH <sub>2</sub>      | 1.84, m<br>1.99, m                       | 1, 2, 4, 5                      |
| 4        | 22.0, CH <sub>2</sub>      | 1.19, m<br>1.54, m                       | 3, 5                            |
| 5        | 40.0, CH <sub>2</sub>      | 2.66, br t (10.9)<br>3.40, m             | 3, 4, 7                         |
| 6-NH     |                            |                                          |                                 |
| 7        | 168.9, C                   |                                          |                                 |
| 8        | 124.7, CH                  | 5.84, d (10.8)                           | 7, 9, 10                        |
| 9        | 142.7, CH                  | 6.06, td (10.8, 3.8)                     | 7, 10, 11                       |
| 10       | 27.6, CH <sub>2</sub>      | 2.45, br d (15.3)<br>3.46, m             | 8, 11, 12                       |
| 11       | 45.7, CH                   | 2.00, m                                  | 9, 12                           |
| 12       | 49.6, CH                   | 2.01, m                                  | 11, 13, 14, 20                  |
| 13       | 68.7, CH                   | 4.08, br t (2.2)                         | 11, 14, 15, 19                  |
| 14       | 82.5, CH                   | 3.38, m                                  | 13, 19, 33                      |
| 15       | 47.6, CH                   | 1.46, dd (11.5, 2.7)                     | 16, 30                          |
| 16       | 43.8, CH                   | 1.73, m                                  | 15, 17, 29, 30, 31              |
| 17       | 33.8, CH                   | 2.16, m                                  | 18, 29                          |
| 18       | 40.2, CH <sub>2</sub>      | 0.66, m<br>2.14, m                       | 15, 17, 20, 29                  |
| 19       | 42.9, CH                   | 1.53, m                                  | 14, 15, 18, 20, 21              |
| 20       | 43.0, CH                   | 1.98, m                                  | 12, 21                          |
| 21       | 36.3, CH <sub>2</sub>      | 1.24, m<br>2.08, m                       | 11, 20, 22, 23                  |
| 22       | 51.2, CH                   | 2.37, m                                  | 10, 11, 21, 23, 24              |
| 23       | 153.2, CH                  | 6.74, dd (15.3, 10.4)                    | 11, 21, 22, 25                  |
| 24       | 123.3, CH                  | 7.13, d (15.3)                           | 22, 25, 26                      |
| 25       | 173.7, C                   |                                          |                                 |
| 26       | 102.2, C                   |                                          |                                 |
| 27       | 177.1, C                   |                                          |                                 |
| 28-NH    |                            |                                          |                                 |
| 29       | 18.0, CH <sub>3</sub>      | 0.89, d (3.5)                            | 16, 17, 18                      |
| 30       | 22.6, CH <sub>2</sub>      | 1.37, m                                  | 15, 16, 17, 31                  |
| 31       | 13.6, CH <sub>3</sub>      | 0.95, t (7.6)                            | 16, 30                          |
| 32       |                            |                                          |                                 |
| 33       | 59.0, CH <sub>3</sub>      | 3.42, s                                  | 14                              |

**Figure S59.** HRESIMS of **7** (Positive mode).

**Elemental Composition Report**

**Single Mass Analysis**

Tolerance = 5.0 PPM / DBE: min = -1.5, max = 50.0

Element prediction: Off

Number of isotope peaks used for i-FIT = 3

Monoisotopic Mass, Even Electron Ions

227 formula(e) evaluated with 2 results within limits (up to 50 best isotopic matches for each mass)

Elements Used:

C: 0-40 H: 0-50 N: 0-4 O: 0-10

315-AA-1

XMJ\_20160319\_YHL\_08 259 (5.555) Cm (258:263)

1: TOF MS ES+  
3.90e+004

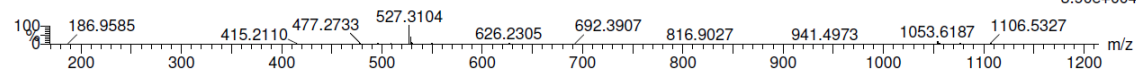

Minimum: -1.5  
Maximum: 5.0 5.0 50.0

| Mass     | Calc. Mass | mDa  | PPM  | DBE  | i-FIT | Norm  | Conf(%) | Formula       |
|----------|------------|------|------|------|-------|-------|---------|---------------|
| 527.3104 | 527.3121   | -1.7 | -3.2 | 10.5 | 298.5 | 0.042 | 95.86   | C30 H43 N2 O6 |
|          | 527.3081   | 2.3  | 4.4  | 6.5  | 301.6 | 3.184 | 4.14    | C25 H43 N4 O8 |

**Figure S60.** <sup>1</sup>H NMR (600 MHz, MeOD) spectrum of **7**.

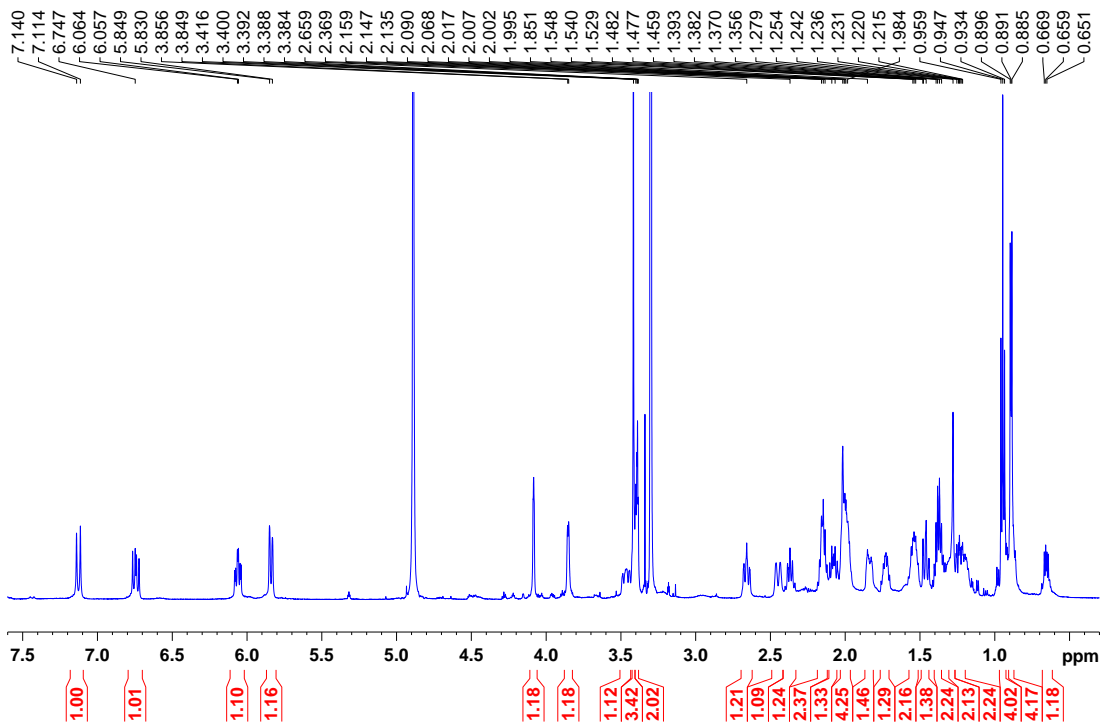

**Figure S61.**  $^{13}\text{C}$  NMR (600 MHz, MeOD) spectrum of **7**.

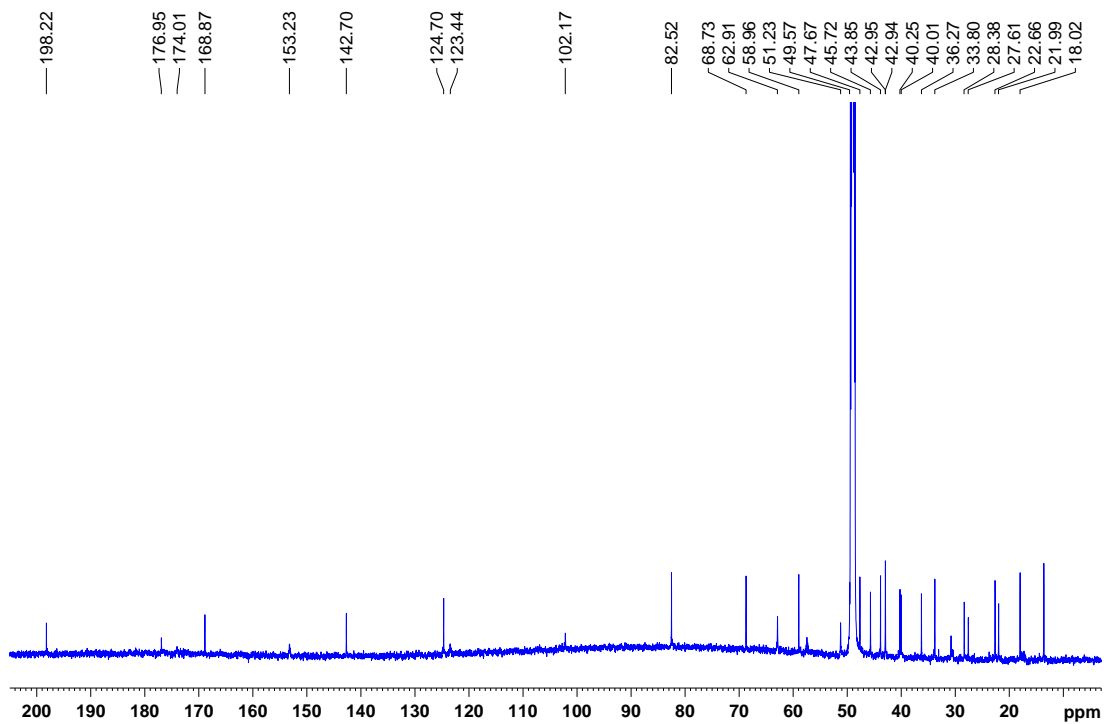

**Figure S62.**  $^{13}\text{C}$ -DEPT NMR (600 MHz, MeOD) spectrum of **7**.

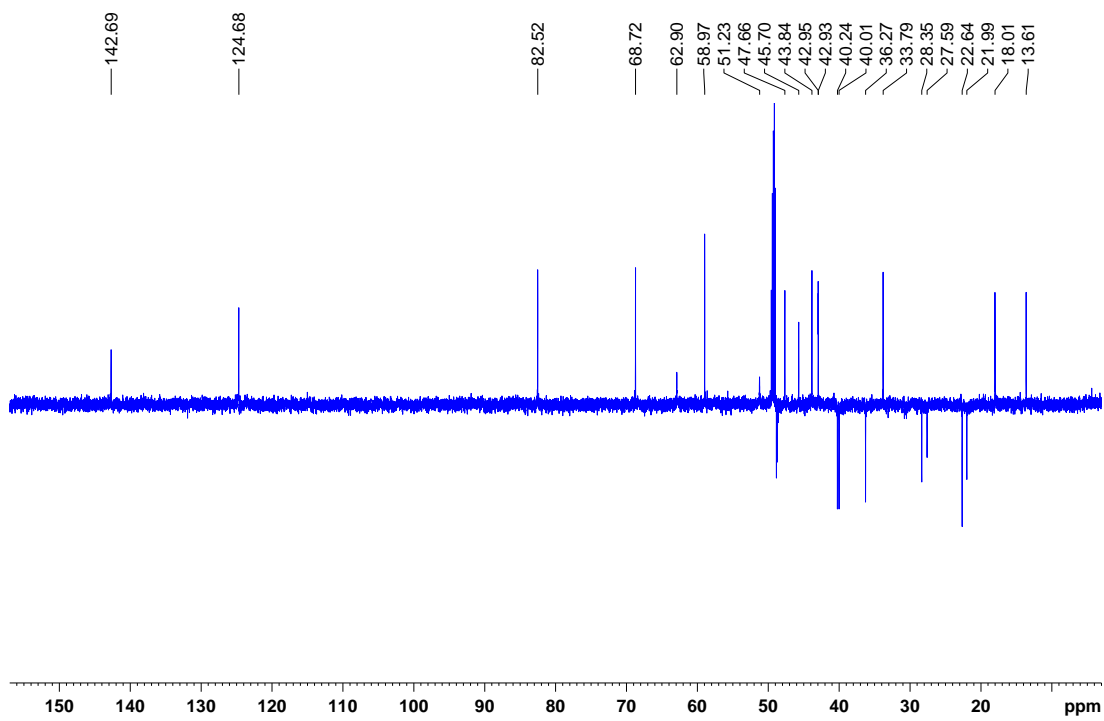

**Figure S63.** HSQC (600 MHz, MeOD) of **7**.

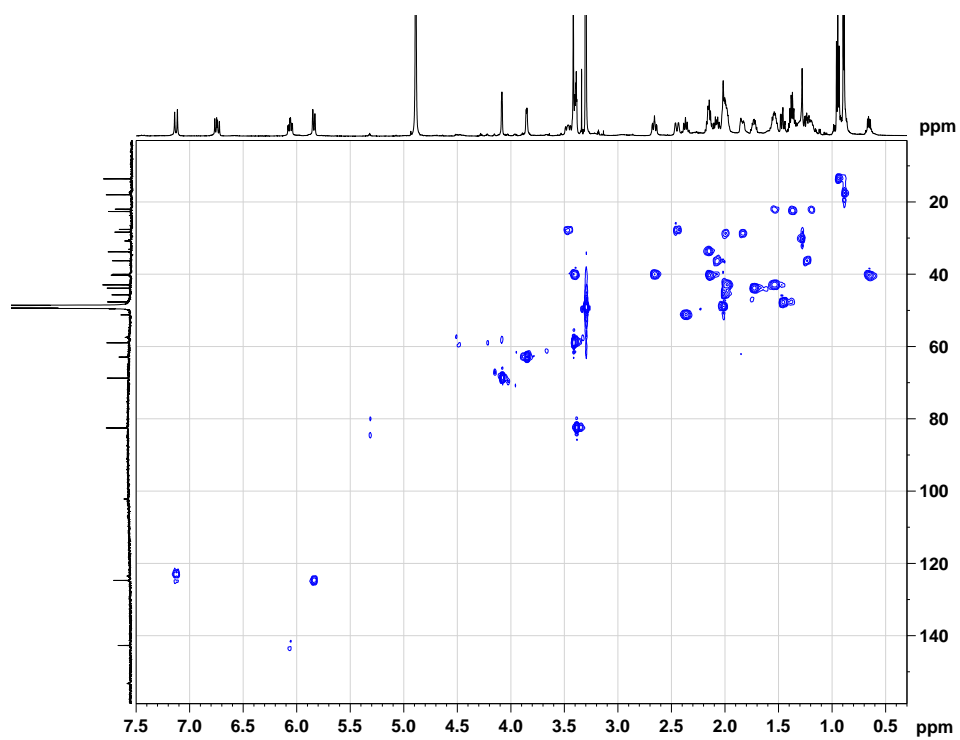

**Figure S64.** HMBC (600 MHz, MeOD) of **7**.

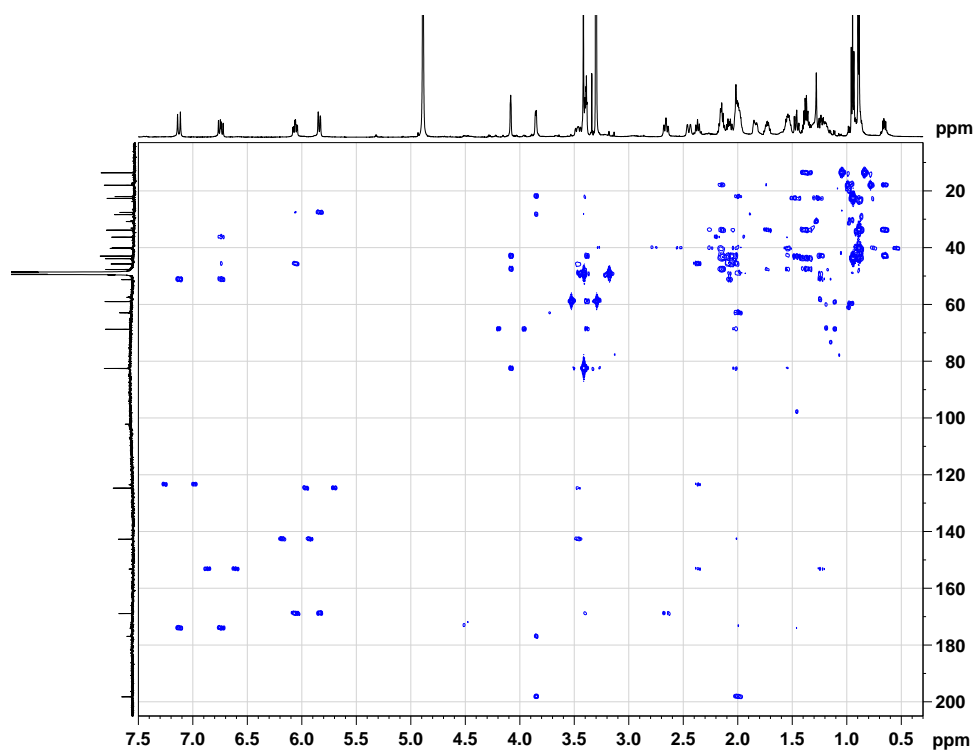

**Figure S65.** COSY (600 MHz, MeOD) of **7**.

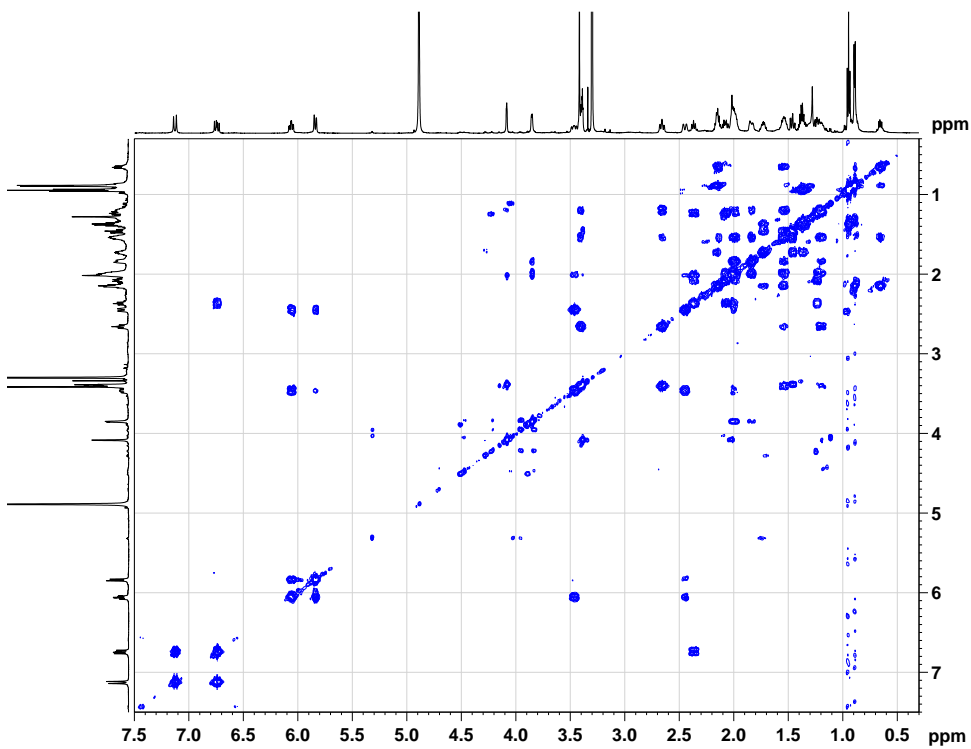

**Figure S66-a.** NOESY (600 MHz, MeOD) of **7**.

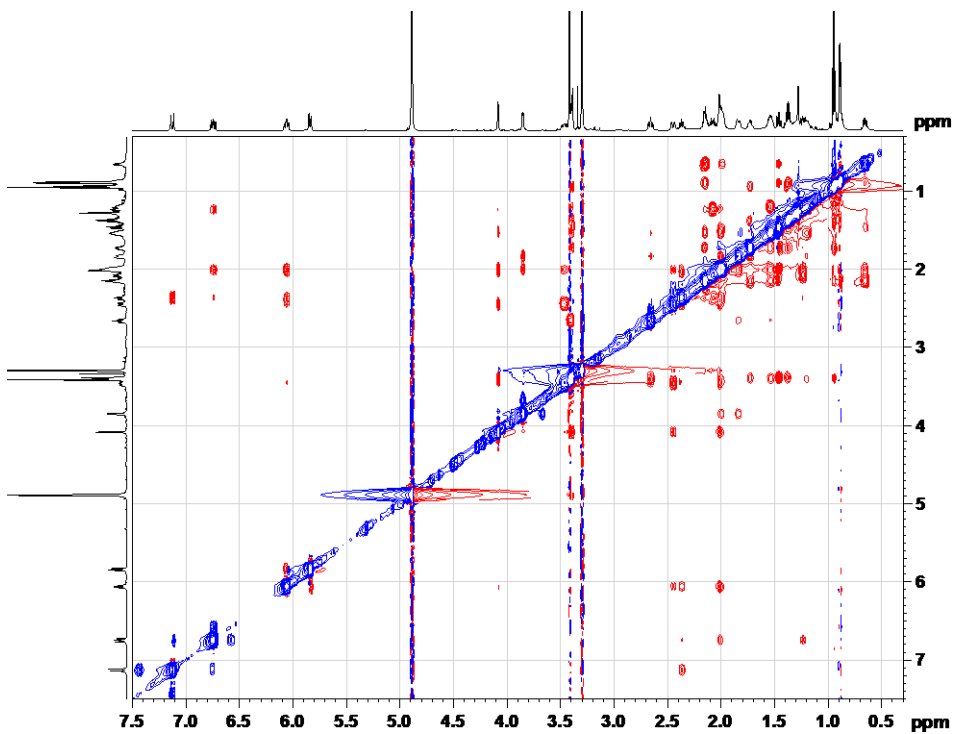



**Figure S66-b. ROESY (600 MHz, MeOD) of 7.**

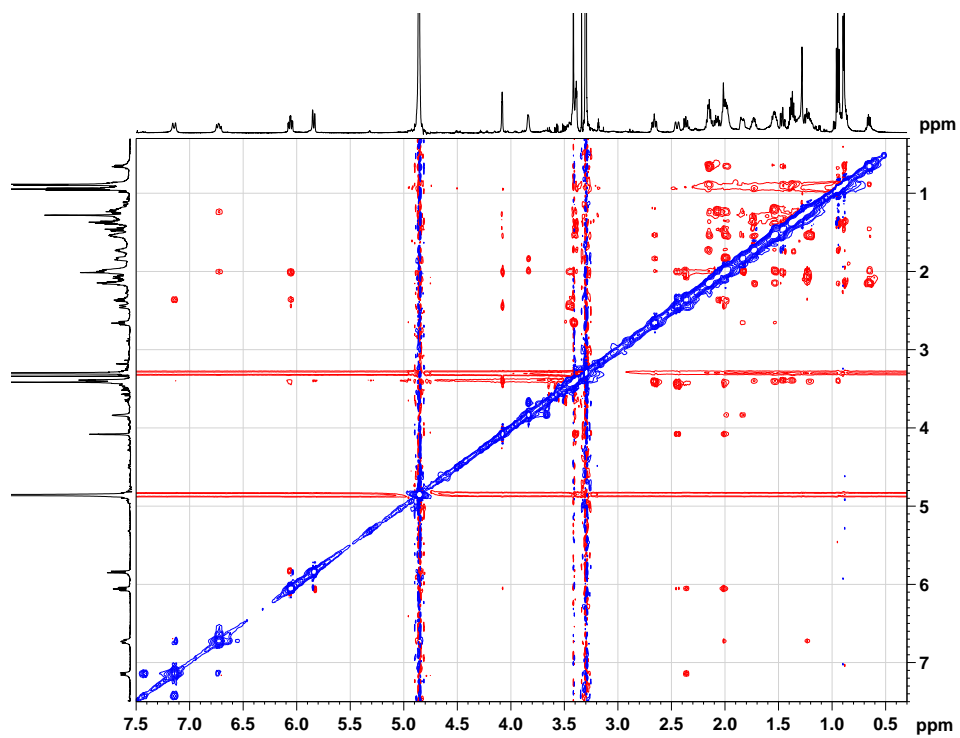

**Table S9.**  $^1\text{H}$  (600 MHz) and  $^{13}\text{C}$  (150 MHz) spectroscopic data of **3'**.

| Position | $\delta_{\text{C}}$ , type | $\delta_{\text{H}}$ , multi ( $J$ in Hz) | HMBC (correlations from H to C) |
|----------|----------------------------|------------------------------------------|---------------------------------|
| 1        | 198.0, C                   |                                          |                                 |
| 2        | 62.5, CH                   | 3.78, br d (3.8)                         | 1, 3, 4, 27                     |
| 3        | 27.9, CH <sub>2</sub>      | 1.85, m<br>2.00, m                       | 1, 2                            |
| 4        | 21.7, CH <sub>2</sub>      | 1.26, m<br>1.52, m                       | 3, 5                            |
| 5        | 39.7, CH <sub>2</sub>      | 2.64, m<br>3.46, br d (12.0)             | 3, 7                            |
| 6-NH     |                            |                                          |                                 |
| 7        | 168.6, C                   |                                          |                                 |
| 8        | 124.9, CH                  | 5.91, d (11.9)                           | 7, 10                           |
| 9        | 141.4, CH                  | 6.05, ddd (11.9, 10.1, 2.8)              | 7, 11                           |
| 10       | 26.8, CH <sub>2</sub>      | 2.42, m<br>3.63, m                       | 8, 9, 11, 12                    |
| 11       | 47.1, CH                   | 1.61, m                                  | 8, 13                           |
| 12       | 41.5, CH                   | 2.28, m                                  | 10, 11, 13, 14, 20              |
| 13       | 55.1, CH                   | 2.89, d (3.8)                            | 11, 12, 14, 20                  |
| 14       | 59.4, CH                   | 3.26, br s                               | 15, 16                          |
| 15       | 48.3, CH                   | 0.93, m                                  | 14, 16, 19, 20, 30              |
| 16       | 52.8, CH                   | 1.88, m                                  | 14, 15, 17, 29, 30, 31          |
| 17       | 34.8, CH                   | 2.39, m                                  | 16, 18, 29                      |
| 18       | 40.0, CH <sub>2</sub>      | 0.65, td (11.9, 8.1)<br>2.04,            | 17, 19, 20, 29                  |
| 19       | 48.6, CH                   | 1.12, m                                  | 14, 18, 20                      |
| 20       | 42.5, CH                   | 1.68, m                                  | 11, 12, 18, 19                  |
| 21       | 38.0, CH <sub>2</sub>      | 1.10, m<br>2.02, m                       | 19, 20, 22                      |
| 22       | 50.0, CH                   | 2.35, m                                  | 11, 21, 23, 24                  |
| 23       | 149.3, CH                  | 6.68, dd (15.0, 9.8)                     | 11, 21, 22                      |
| 24       | 124.7, CH                  | 7.28, m                                  | 22                              |
| 25       | 176.3, C                   |                                          |                                 |
| 26       | 102.4, C                   |                                          |                                 |
| 27       | 177.5, C                   |                                          |                                 |
| 28-NH    |                            |                                          |                                 |
| 29       | 18.3, CH <sub>3</sub>      | 1.08, d (7.74)                           | 16, 17, 18                      |
| 30       | 68.9, CH                   | 3.87, m                                  | 16, 17                          |
| 31       | 23.5, CH <sub>3</sub>      | 1.36, d (6.3)                            | 16, 30                          |

Measured in mixture solvent 90% MeOD/ C<sub>6</sub>D<sub>6</sub>.

**Figure S67.** HRESIMS of 3' (Positive mode).

**Single Mass Analysis**

Tolerance = 10.0 PPM / DBE: min = -1.5, max = 50.0

Element prediction: Off

Number of isotope peaks used for i-FIT = 3

Monoisotopic Mass, Even Electron Ions

188 formula(e) evaluated with 2 results within limits (up to 50 closest results for each mass)

Elements Used:

C: 25-35 H: 0-45 N: 0-5 O: 0-10

511-2

XMJ\_20160613\_YHL\_02 197 (3.841) Cm (196:198)

1: TOF MS ES+  
1.59e+004

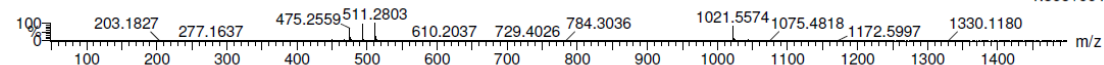

Minimum: -1.5  
Maximum: 5.0 10.0 50.0

| Mass     | Calc. Mass | mDa  | PPM  | DBE  | i-FIT | Norm  | Conf(%) | Formula       |
|----------|------------|------|------|------|-------|-------|---------|---------------|
| 511.2803 | 511.2808   | -0.5 | -1.0 | 11.5 | 203.4 | 0.094 | 91.01   | C29 H39 N2 O6 |
|          | 511.2848   | -4.5 | -8.8 | 15.5 | 205.7 | 2.409 | 8.99    | C34 H39 O4    |

**Figure S68.** <sup>1</sup>H NMR (600 MHz, 90% MeOD/C<sub>6</sub>D<sub>6</sub>) spectrum of 3'.

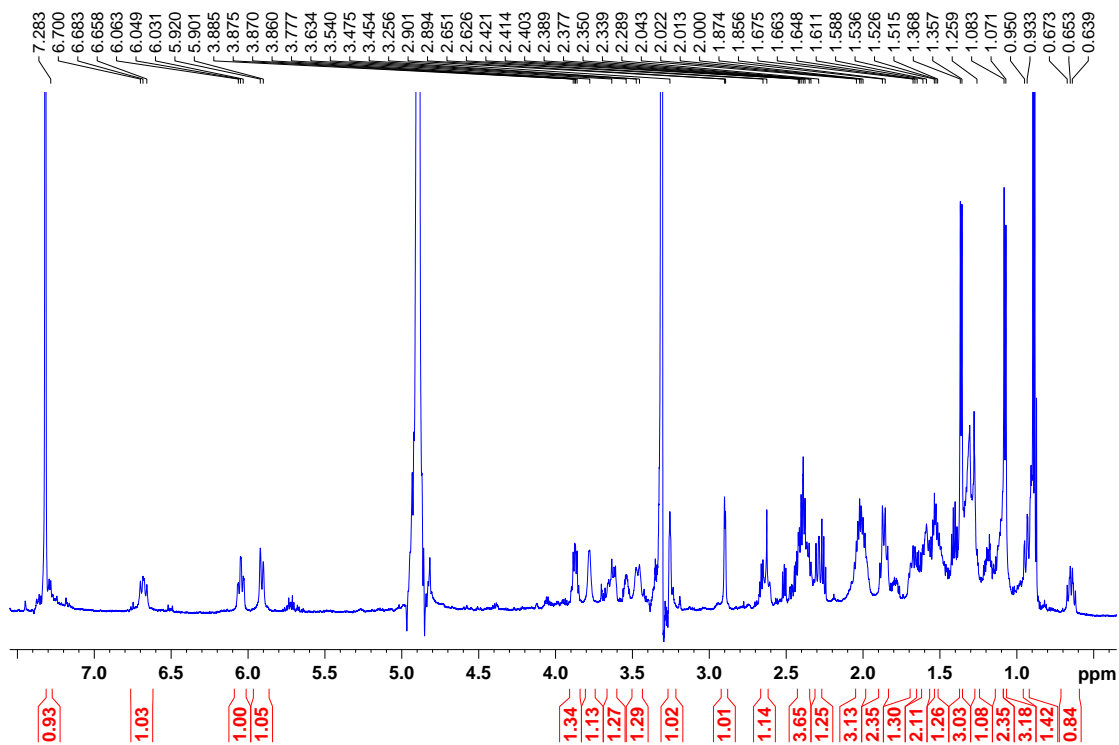

**Figure S69.**  $^{13}\text{C}$  NMR (600 MHz, 90% MeOD/ $\text{C}_6\text{D}_6$ ) spectrum of **3'**.

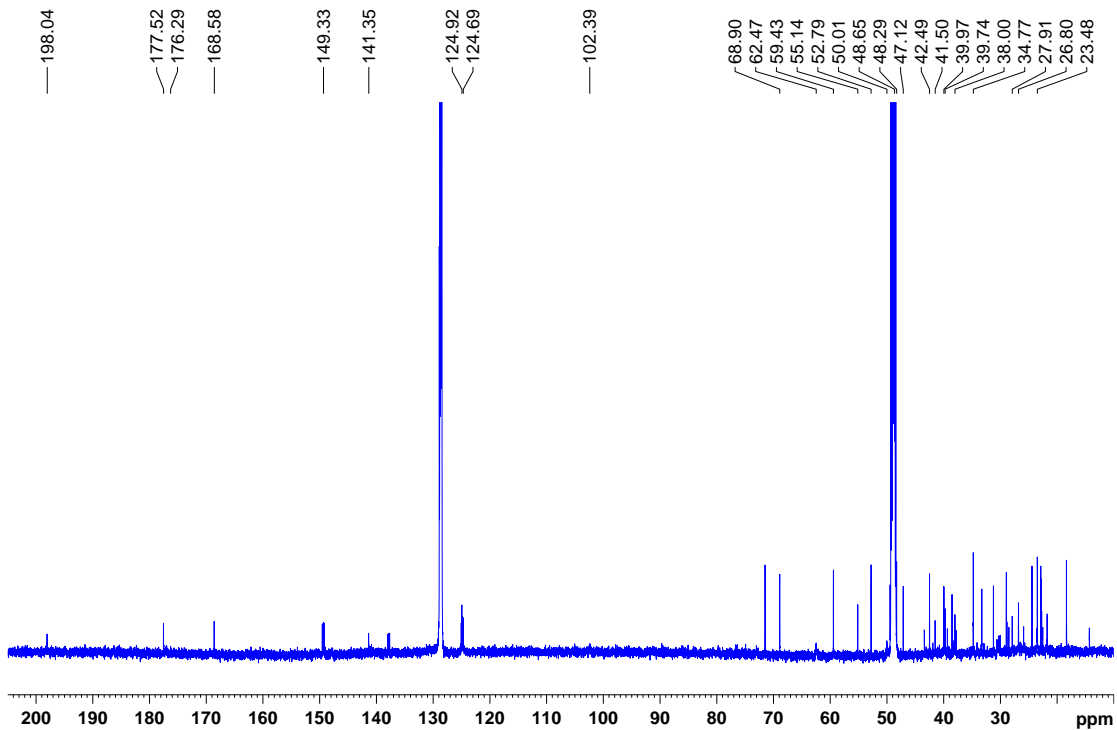

**Figure S70.**  $^{13}\text{C}$ -DEPT NMR (600 MHz, 90% MeOD/ $\text{C}_6\text{D}_6$ ) spectrum of **3'**.

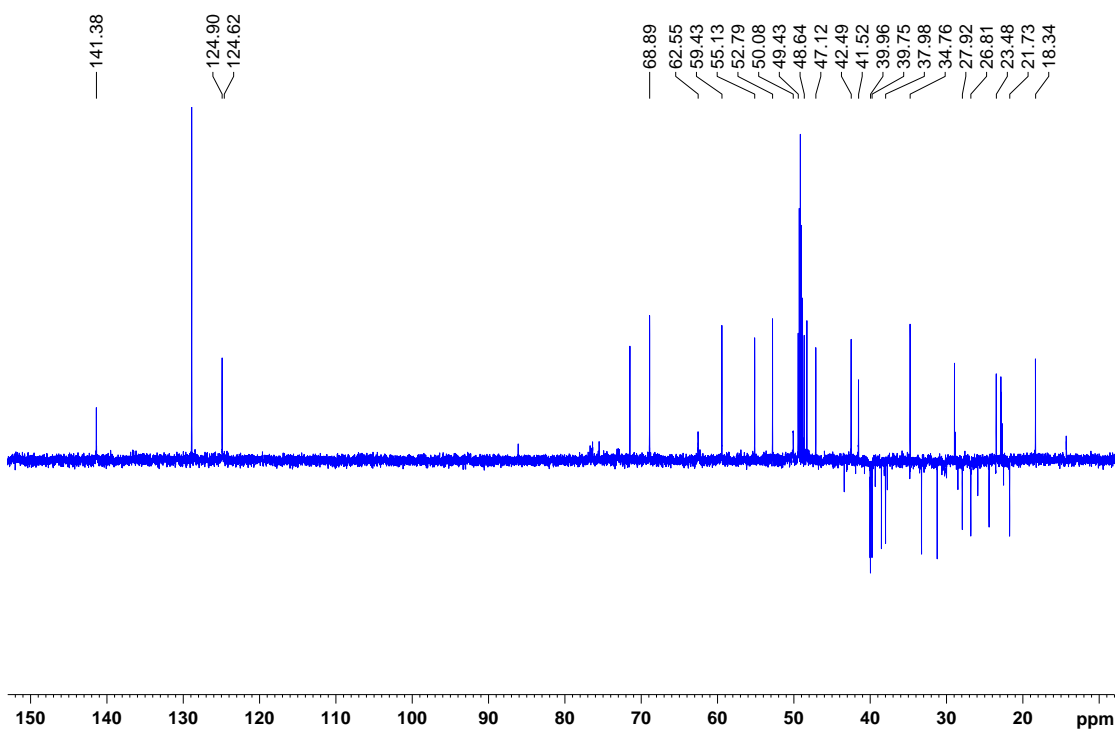

**Figure S71.** HSQC (600 MHz, 90% MeOD/C<sub>6</sub>D<sub>6</sub>) of 3'.

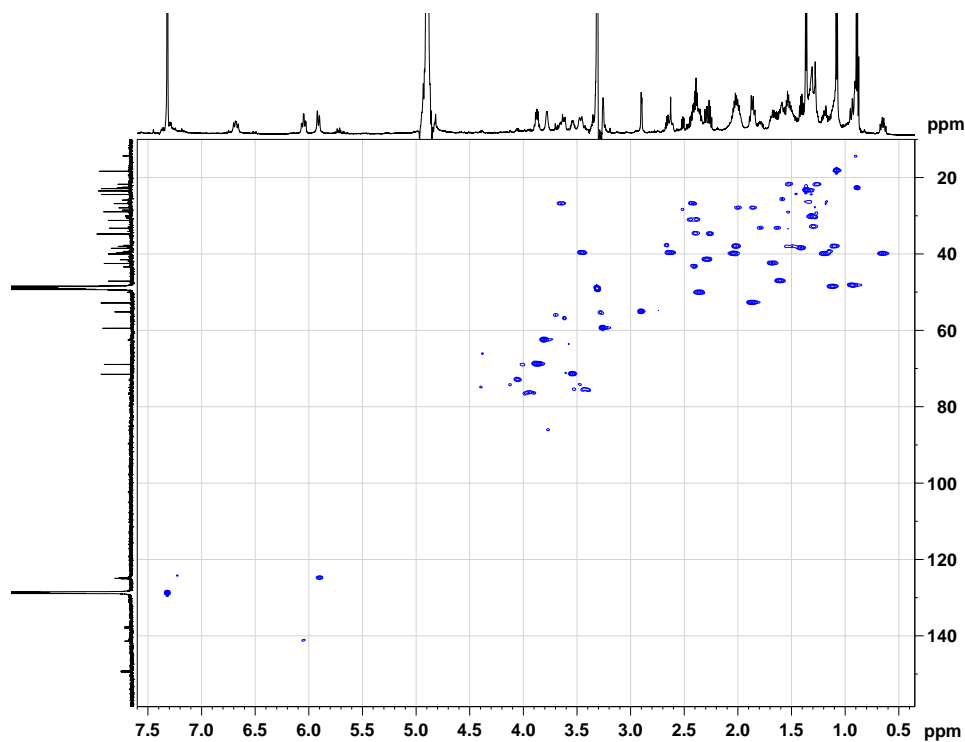

**Figure S72.** HMBC (600 MHz, 90% MeOD/C<sub>6</sub>D<sub>6</sub>) of 3'.

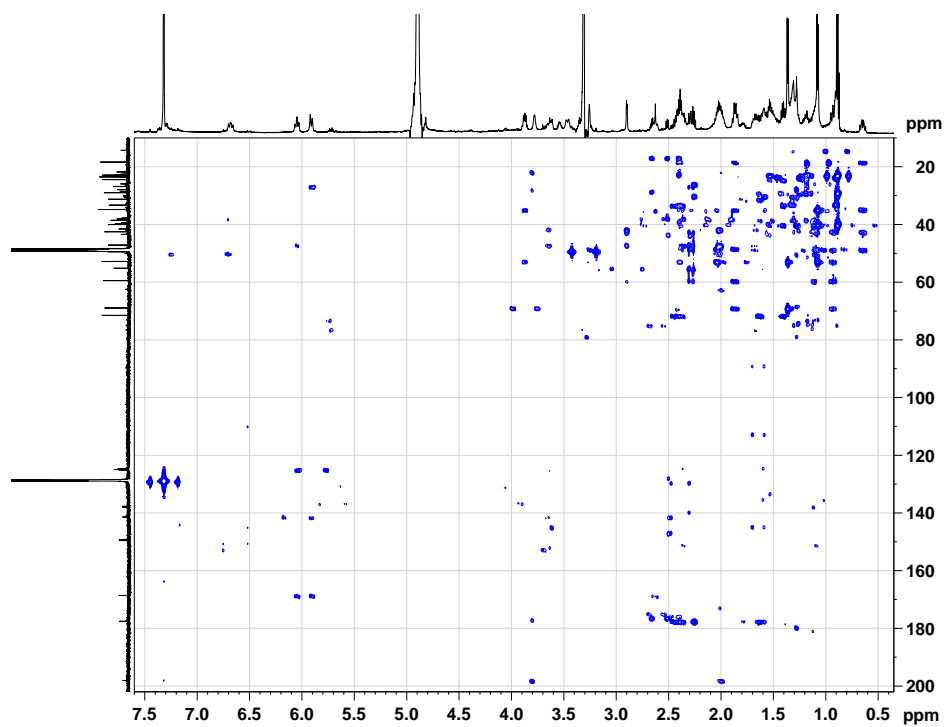

**Figure S73.** COSY (600 MHz, 90% MeOD/C<sub>6</sub>D<sub>6</sub>) of 3'.

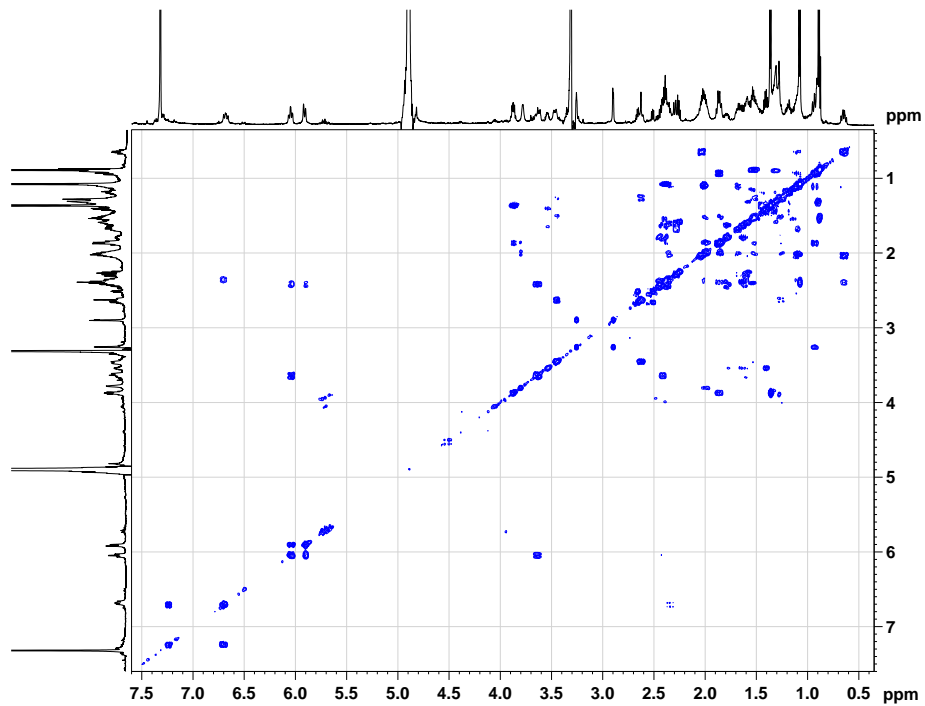

**Figure S74.** NOESY (600 MHz, 90% MeOD/C<sub>6</sub>D<sub>6</sub>) of 3'.

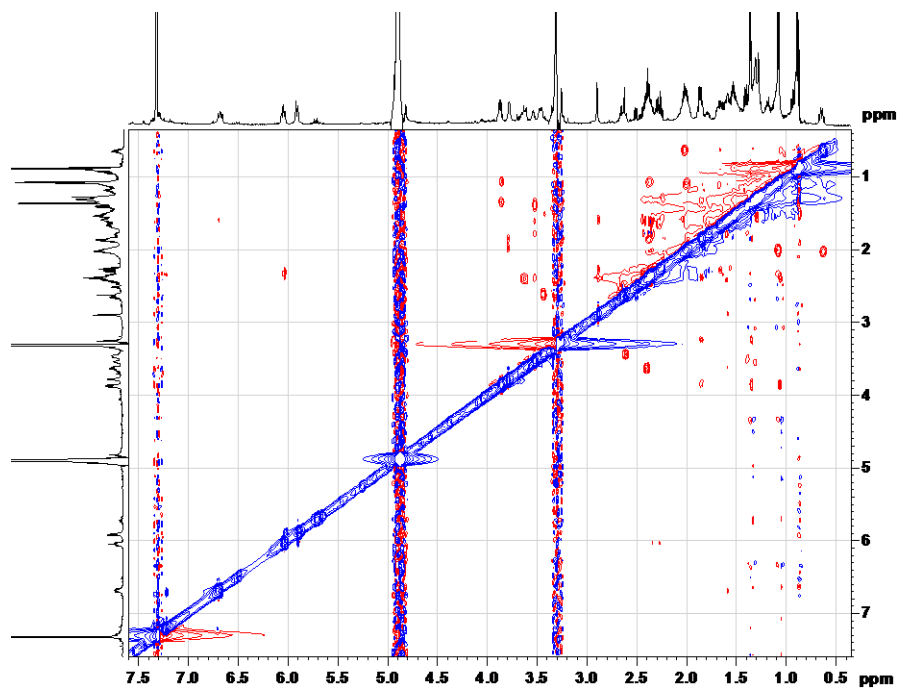

**Figure S75.** Kinetic analysis with Surface Plasmon Resonance (SPR) for A) ikarugamycin (**1**) and B) capsimycin B (**3**) binding to the IkaD.

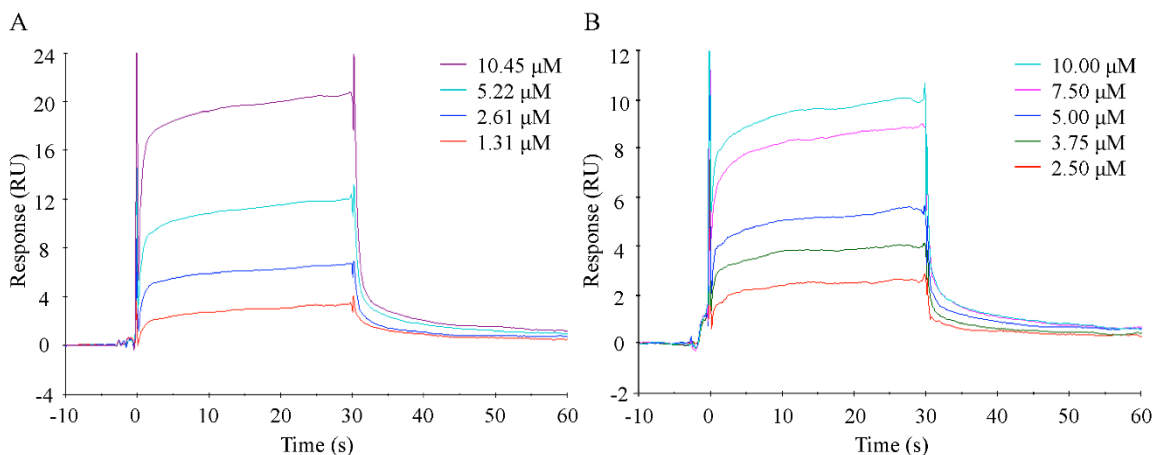

**Table S10.** Binding affinities and kinetic parameters for the interactions between ikarugamycin (**1**) and capsimycin B (**3**) with IkaD as measured with SPR.

|                           | $k_a$ (1/Ms)       | $k_d$ (1/s) | $K_D$ (M)             |
|---------------------------|--------------------|-------------|-----------------------|
| ikarugamycin ( <b>1</b> ) | $2.37 \times 10^4$ | 0.1305      | $5.50 \times 10^{-6}$ |
| capsimycin B ( <b>3</b> ) | $1.07 \times 10^4$ | 0.0713      | $6.65 \times 10^{-6}$ |

$k_a$ , association rate constant;  $k_d$ , dissociation rate constant;  $K_D$ , equilibrium dissociation constant.

### Surface Plasmon Resonance (SPR) assay

All binding kinetic experiments were performed at 25 °C using Biacore T200 instrument equipped with a CM5 sensor chip (GE Healthcare, USA). The surface of the CM5 chip was pre-activated with a 1:1 mixture of 0.05 M

*N*-hydroxysuccinimide (NHS) and 0.2 M *N*-ethyl-*N*'-(3-dimethylaminopropyl) carbodiimide (EDC). Then fresh IkaD, diluted to 70 µg/mL in 10 mM sodium acetate (pH 4.0), was immobilized on the CM5 chip via amino coupling, following blocking by 1 M ethanolamine HCl (pH 8.5). An empty chip surface was submitted as a negative control to monitor nonspecific binding between compounds with the surface. Ikarugamycin (**1**) and capsimycin B (**3**) were sequentially diluted with running buffer to different concentrations (ikarugamycin: 0-10.45 µM; capsimycin B: 0-10 µM), and injected with HBS-EP+ running buffer over the chip surfaces at a constant flow rate of 30 µL/min. Between experiments, surfaces were regenerated with 50 mM glycine (pH 9.5). Nonspecific sensorgrams were subtracted from experimental sensorgrams to obtain curves representing specific binding. Kinetics and affinity parameters were evaluated in global fitting based on a 1:1 binding model by using Biacore evaluation software (version 3.0).



**Figure S76.** The reactions of capsimycin B (**3**) with NaX (X = Cl, Br, I). Targeted products were detected under the following conditions. A) Reaction of compound **3** in MeOH/H<sub>2</sub>O; UPLC-total ion chromatography MS profiles of the products produced under the condition of B) 1 h after the mixing with TFA at room temperature; C) 1 h after the mixing with TFA at 45 °C; D) MS spectra of (a) capsimycin B + HCl, (b) capsimycin B + HBr, and (c) capsimycin B + HI.

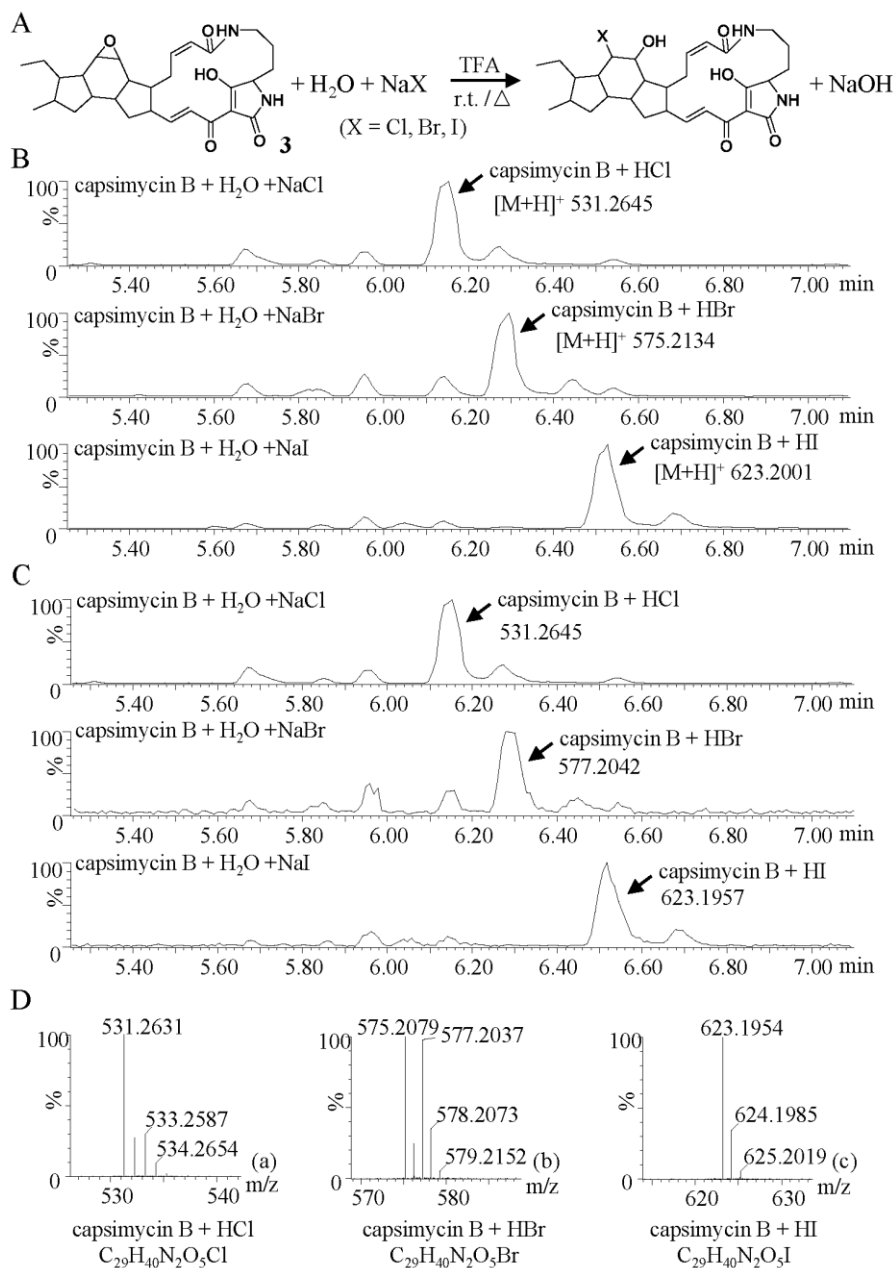

**Figure S77.** The reactions of capsimycin B (**3**) with NaX (X = Cl, Br, I). No products were detected under the following conditions. A) Reaction of compound **3** in MeOH/H<sub>2</sub>O; UPLC-total ion chromatography MS profiles of the products produced under the condition of B) immediately after the mixing at room temperature; C) 1 h after the mixing at room temperature; D) 1 h after the mixing at 45 °C.

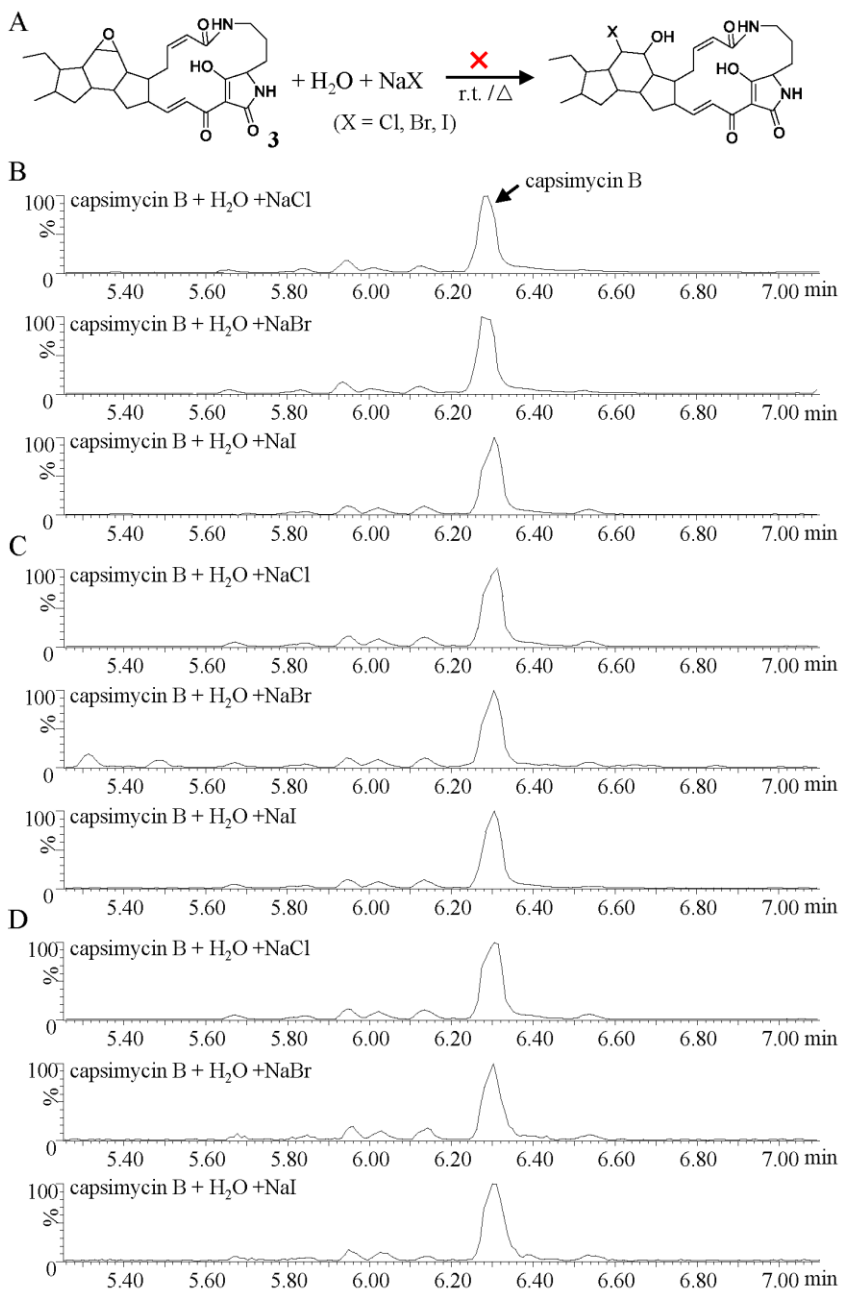

**Figure S78.** The reactions of capsimycin B (**3**) with H<sub>2</sub>O. Targeted product (**4**) was detected under the following conditions. A) Reaction of compound **3** in MeOH/H<sub>2</sub>O can be accelerated by the TFA; B) UPLC-total ion chromatography MS profiles of the products produced under the condition of a) immediately after the mixing at room temperature; b) 1 h after the mixing at 45 °C; c) 1 h after the mixing with TFA at room temperature; (d) 1 h after the mixing with TFA at 45 °C.

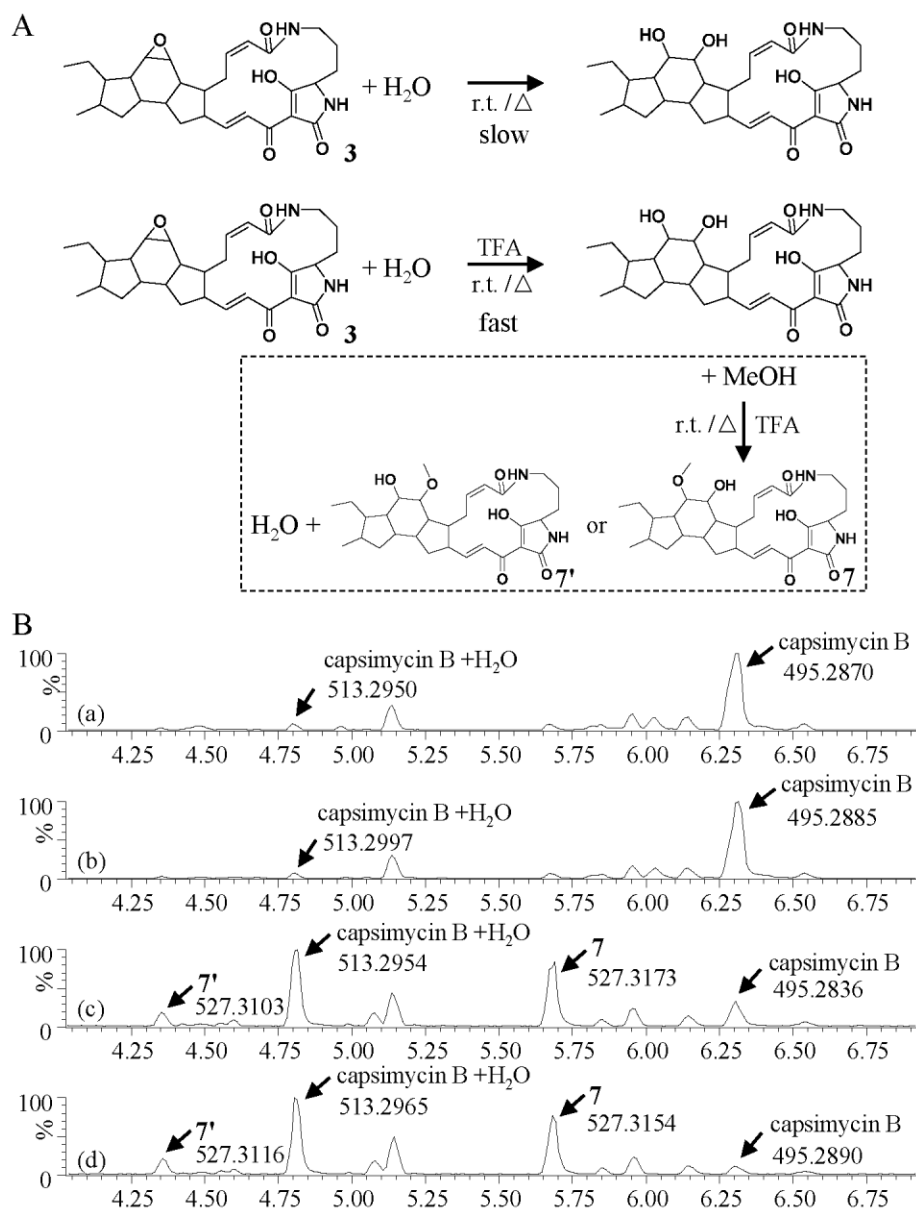

**Figure S79. Gel filtration of purified IkaD indicated with the blue line.**

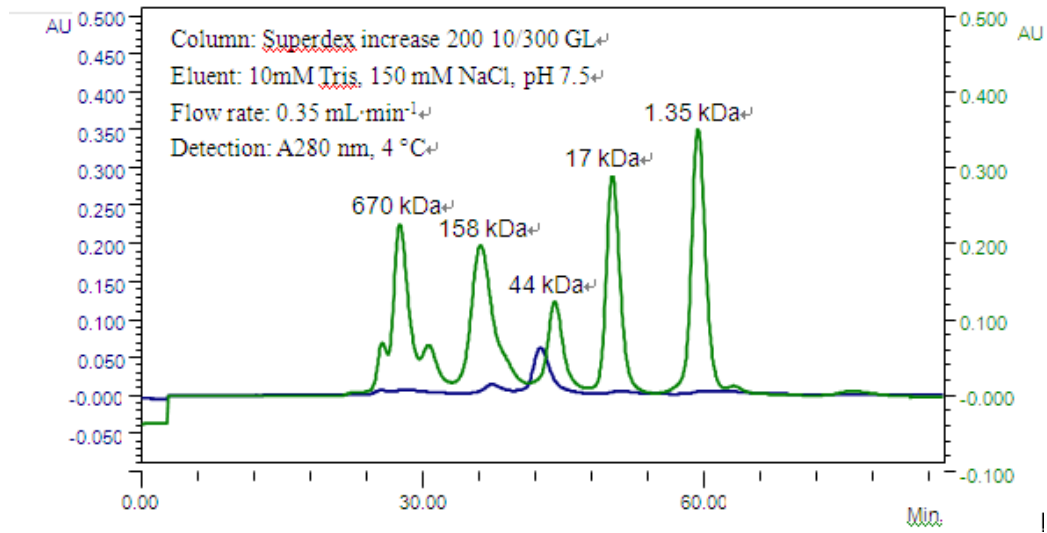

**Gel filtration of purified IkaD.** The standards (Bio-Red, USA) are shown in green and are as follows: 1.35 kDa (Vitamin B12), 17 kDa (Myoglobin from horse), 44 kDa (Ovalbumin from chicken), 158 kDa ( $\gamma$ -globulin from bovine) and 670 kDa (Thyroglobulin from bovine). The molecular mass of the recombinant P450 monooxygenase IkaD was determined by analytical gel filtration on Biologic DuoFlow™ Chromatography System (Bio-Rad, USA), column using Tris-HCl (10mM Tris, 150 mM NaCl, pH 7.5) buffer.

# Figure S80. IkaD identification by nano LC-MS/MS and database search

## (MATRIX) MASCOT Search Results

User : hou  
 E-mail :  
 Search title : maXis\_manual  
 MS data file : 281474976714999.mgf  
 Database : Trembl 2016\_01 (59,718,159 sequences; 19,944,314,533 residues)  
 Taxonomy : Bacteria (Eubacteria) (37,204,640 sequences)  
 Timestamp : 10 Aug 2016 at 05:38:07 GMT

Re-search All Non-significant Unassigned [help] Export As XML

Not what you expected? Try the select summary.

### Search parameters

Type of search : MS/MS Ion Search  
 Enzyme : Trypsin  
 Fixed modifications : Carbamidomethyl (C)  
 Variable modifications : Oxidation (M)  
 Mass values : Monoisotopic  
 Protein mass : Unrestricted  
 Peptide mass tolerance : ± 20 ppm (# <sup>13</sup>C = 2)  
 Fragment mass tolerance : ± 0.05 Da  
 Max missed cleavages : 2  
 Instrument type : ESI-QUAD-TOF  
 Number of queries : 7,741

### Score distribution

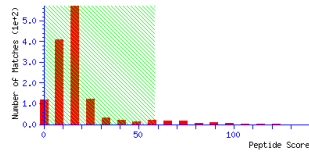

Peptide score distribution. Ions score is  $-10 \log(P)$ , where  $P$  is the probability that the observed match is a random event. Individual ions scores > 58 indicate identity or extensive homology ( $p < 0.05$ ).

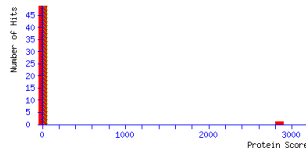

[Deprecated] Score distribution for family members in the first 50 proteins. Protein scores are derived from ions scores as a non-probabilistic basis for ranking protein families.

### Legend

| Dupes | Expect Rank | U 1 | 2 | Peptide     |                                                                  |
|-------|-------------|-----|---|-------------|------------------------------------------------------------------|
|       | 0.037       | 2   |   | GAYSLSLR    | significant                                                      |
|       |             |     | 1 | GFLPVEGCR   | top ranking                                                      |
|       | 6.4e-005    | 1   |   | GSSIFGLAPGK | significant and top ranking                                      |
|       | 1.3e-006    | 1   |   | SSGTSYDVLK  | peptide is found in all proteins in family member 1              |
|       | 6.2e-007    | 1   |   | VCNVYVSWIK  | peptide is found in some but not all proteins in family member 2 |
|       | 6.4e-005    | 1   | U | GSSIFGLAPGK | unique                                                           |
| 2     | 5.7e-005    | 1   |   | LNTLETEWFFK | peptide has two duplicates                                       |
|       | 0.18        | 1   |   | LNTLETEWFFK | duplicate peptide                                                |

Right-facing triangle (▶) in the Dupes or Rank column indicates content that can be expanded by clicking on it. Down-facing triangle (▼) indicates the content is expanded and can be collapsed. For more details about particular columns, see results format help.

### Protein Family Summary

Filter Significance threshold p < 0.05 Max. number of families AUTO [help]  
 Ions score or expect cut-off 15.0 Dendrograms cut at 0  
 Preferred taxonomy All entries

Proteins (6) Report Builder Unassigned (7609) [permalink]

### Protein families 1-6 (out of 6)

10 per page 1 Expand all Collapse all  
 Accession contains Find

1 A0A0F7FYZ9 2847 Unspecific monooxygenase OS=Streptomyces xiamenensis GN=SXIM\_40690 PE=3 SV=1  
 1.1 A0A0F7FYZ9 Score Mass Matches Sequences empAI 2847 46024 131 (100) 22 (18) 6.44 Unspecific monooxygenase OS=Streptomyces xiamenensis GN=SXIM\_40690 PE=3 SV=1

### 131 peptide matches (38 non-duplicate, 93 duplicate)

Auto-fit to window

| Query Dupes | Observed | Mr(expt)  | Mr(calc)  | ppm   | M | Score | Expect   | Rank | U | Peptide                           |
|-------------|----------|-----------|-----------|-------|---|-------|----------|------|---|-----------------------------------|
| A4386 3     | 516.7761 | 1031.5376 | 1031.5287 | 8.55  | 0 | 57    | 0.071    | 1    | U | R.FGVENELK.W                      |
| A5104       | 673.8522 | 1345.6899 | 1345.7030 | -9.74 | 1 | 40    | 0.038    | 1    | U | R.FGVENELKMK.Q                    |
| A5109       | 449.5746 | 1345.7020 | 1345.7030 | -0.74 | 1 | 30    | 0.12     | 1    | U | R.FGVENELKMK.Q                    |
| A5144 6     | 452.9169 | 1355.7289 | 1355.7350 | -4.53 | 0 | 65    | 0.0008   | 1    | U | R.HVPLSGSFPR.Y                    |
| A5205 1     | 678.8746 | 1355.7347 | 1355.7350 | -0.22 | 0 | 100   | 5.1e-007 | 1    | U | R.HVPLSGSFPR.Y                    |
| A5418 1     | 683.8495 | 1365.6844 | 1365.6928 | -6.16 | 0 | 92    | 1.4e-006 | 1    | U | R.LPYGDDAYLAIR.Y                  |
| A5543 2     | 709.3669 | 1416.7192 | 1416.7361 | -11.9 | 0 | 122   | 1.3e-008 | 1    | U | R.PSIVASLOGDQPR.T                 |
| A5687       | 718.9174 | 1435.8202 | 1435.8259 | -4.00 | 1 | 45    | 0.18     | 1    | U | R.RGEAVIPLAANR.D                  |
| A5690 1     | 479.6157 | 1435.8253 | 1435.8259 | -0.40 | 1 | 80    | 0.00014  | 1    | U | R.RGEAVIPLAANR.D                  |
| A5833 5     | 749.9245 | 1497.8344 | 1497.8402 | -3.87 | 0 | 108   | 7.1e-007 | 1    | U | R.VELQVLEALTER.F                  |
| A5886 1     | 500.2875 | 1497.8407 | 1497.8402 | 0.30  | 0 | 80    | 6.9e-005 | 1    | U | R.VELQVLEALTER.F                  |
| A6005 1     | 503.5863 | 1507.7370 | 1507.7276 | 6.26  | 0 | 59    | 0.0084   | 1    | U | R.ARPDDMFQMLVLR.A                 |
| A6046 2     | 761.8875 | 1521.7605 | 1521.7675 | -4.61 | 0 | 123   | 3.1e-008 | 1    | U | R.YATDLELGGVTVR.R                 |
| A6054 1     | 508.2615 | 1521.7627 | 1521.7675 | -3.15 | 0 | 56    | 0.0078   | 1    | U | R.YATDLELGGVTVR.R                 |
| A6253       | 508.9137 | 1523.7192 | 1523.7225 | -2.17 | 0 | 51    | 0.0037   | 1    | U | R.ARPDDMFQMLVLR.A + Oxidation (M) |
| A6259       | 508.9170 | 1523.7292 | 1523.7225 | 4.44  | 0 | 26    | 0.28     | 1    | U | R.ARPDDMFQMLVLR.A + Oxidation (M) |
| A6422       | 811.4355 | 1620.8564 | 1620.8624 | -3.67 | 1 | 71    | 0.00015  | 1    | U | R.VRLPYGDDAYLAIR.Y                |
| A6426 2     | 941.2968 | 1620.8686 | 1620.8624 | 3.85  | 1 | 102   | 4.2e-006 | 1    | U | R.VRLPYGDDAYLAIR.Y                |
| A6432 17    | 941.9420 | 1622.8042 | 1622.8165 | -7.57 | 0 | 75    | 1.1e-005 | 1    | U | R.VVGLFSLDPPQHSR.L                |
| A6434 4     | 812.4039 | 1622.8051 | 1622.8165 | -7.00 | 0 | 76    | 1.7e-005 | 1    | U | R.VVGLFSLDPPQHSR.L                |
| A6521 1     | 955.6119 | 1663.8138 | 1663.8287 | -8.93 | 1 | 43    | 0.037    | 1    | U | R.RARPDDMFQMLVLR.A                |
| A6523       | 830.9165 | 1663.8185 | 1663.8287 | -6.13 | 1 | 44    | 0.019    | 1    | U | R.RARPDDMFQMLVLR.A                |
| A6559       | 860.2891 | 1677.8455 | 1677.8466 | -13.7 | 1 | 22    | 0.22     | 1    | U | R.YATDLELGGVTVR.R                 |

1 subset or intersection (1 subset protein in total)

## Protein identification by nano LC-MS/MS and database search

IkaD was reduced by 1M DTT at 60 °C for 30 min and cysteine residues were blocked by 1M IAM for 20 min at room temperature. Protein was digested with Sequencing Grade Modified Trypsin (Promega, USA) via the FASP protocol with spin ultrafiltration units of nominal molecular weight limit of 10,000 Da. After digestion, the peptides were collected by centrifugation and the filtration units were washed with 50 mM  $\text{NH}_4\text{HCO}_3$ . Then the pooled peptides were dried by SpeedVac and re-dissolved in 2% ACN with 0.1% formic acid. Each of the fractions was performed using an LC system (Nano Pump, Ultimate 3000, Dionex, Thermofisher) equipped with an ESI-Q-TOF mass spectrometer (maXis, Impact, Bruker Daltonik, Germany). Briefly, the peptides were loaded onto a peptide trap column (100  $\mu\text{m} \times 2 \text{ cm}$ , 5  $\mu\text{m}$ , Dionex, Thermofisher) for desalination and concentration with 2% ACN and 0.1% formic acid at a flow rate of 5  $\mu\text{L}/\text{min}$  for 10 min. Trapped peptides were released and separated in a C18 capillary column (75  $\mu\text{m} \times 15 \text{ cm}$ , 3  $\mu\text{m}$ , Dionex, Thermofisher). The peptides were eluted with a gradient of 4-80% ACN/ $\text{H}_2\text{O}$  hold for 50 min at a constant flow rate of 400 nL/min. The mass spectrometer was performed in data dependent acquisition mode ( $m/z$  350-1500) using a full MS scan followed by ten MS/MS scans on the ten most intense ions from the MS spectrum. Tandem mass spectra were processed with Compass Data Analysis (version 4.1) according to the standard workflow. The peak list was directly generated from raw data using centroid algorithm with peak width set as 0.1  $m/z$  and intensity above 100, and submitted for database search using Mascot (version 2.4, Matrix Science) to identify the protein from the Trembl\_Bacteria database (37,204,640 sequences). No peak smooth or filter process was applied. Carbamidomethyl of cysteine was specified as fixed modifications (C) and oxidation of methionine was specified as variable modification (M). Two missed cleavages were allowed to trypsin. Peptide mass tolerance was set to 20 ppm and fragment mass tolerance to 0.8 Da. Peptide charges of +2, +3, and +4 were selected. The criteria of two peptides and a significance threshold  $p < 0.05$  were used for peptide identification.

**Figure S81.** Expanded NOESY spectra (600 MHz, MeOD/CDCl<sub>3</sub>) of **4** (A-C) and expanded ROESY spectra (600 MHz, MeOH/CDCl<sub>3</sub>) of **5** (D-E).

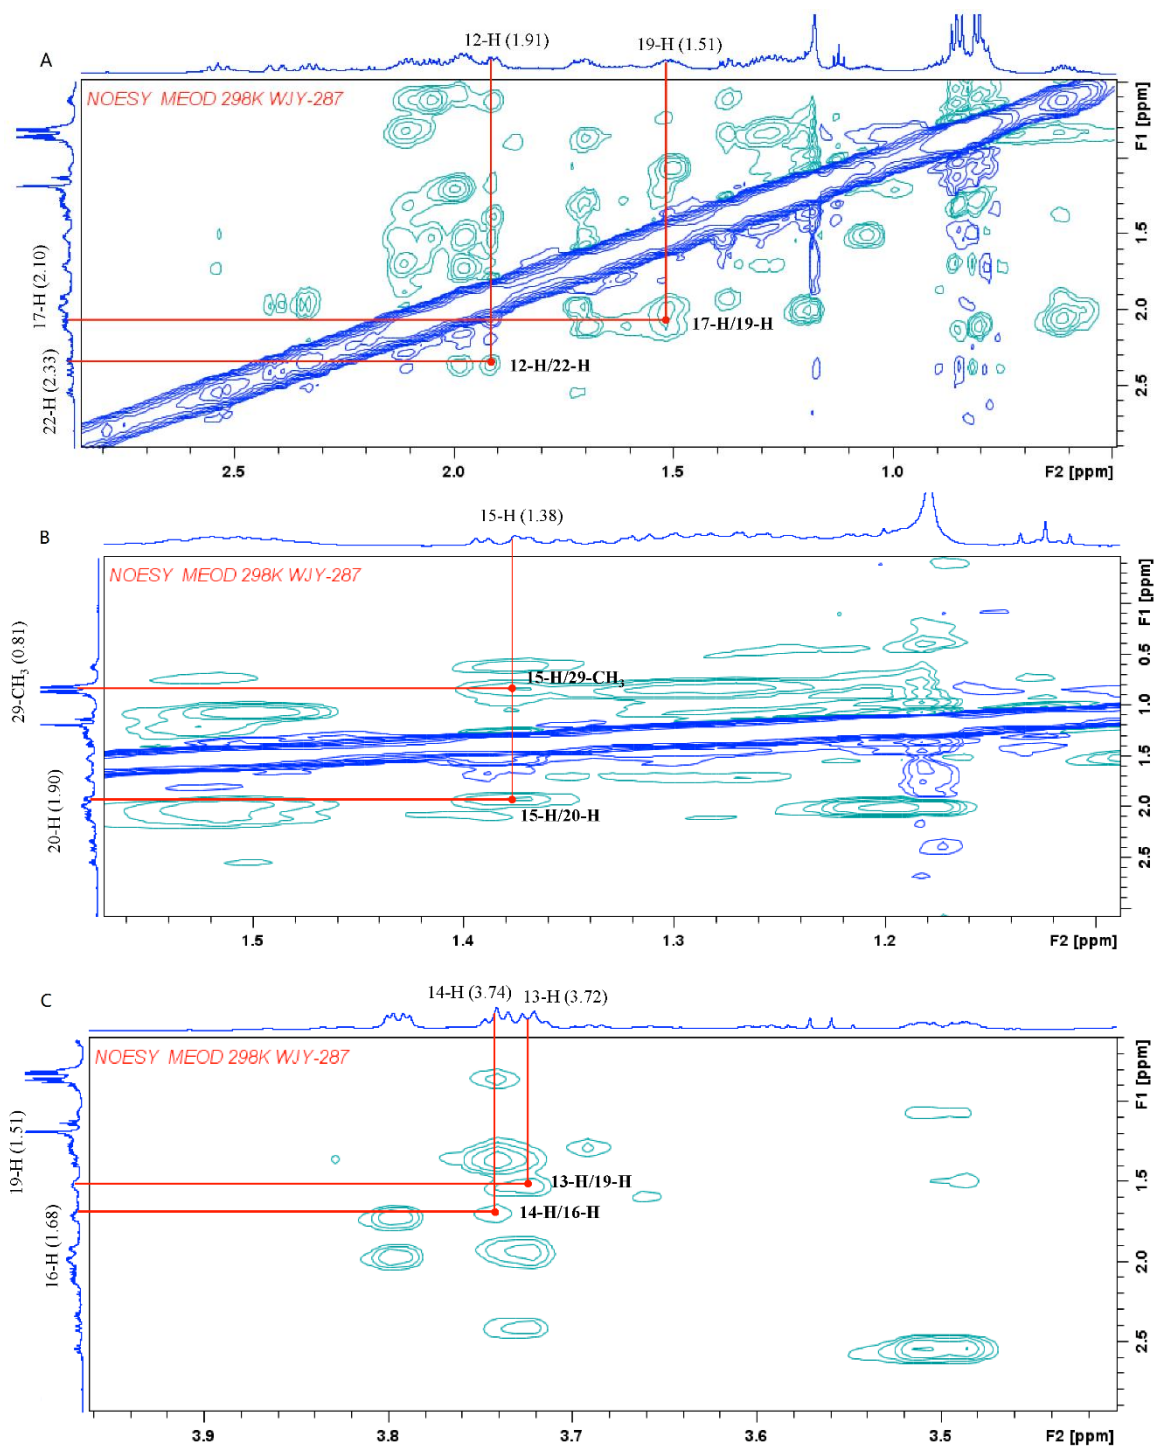

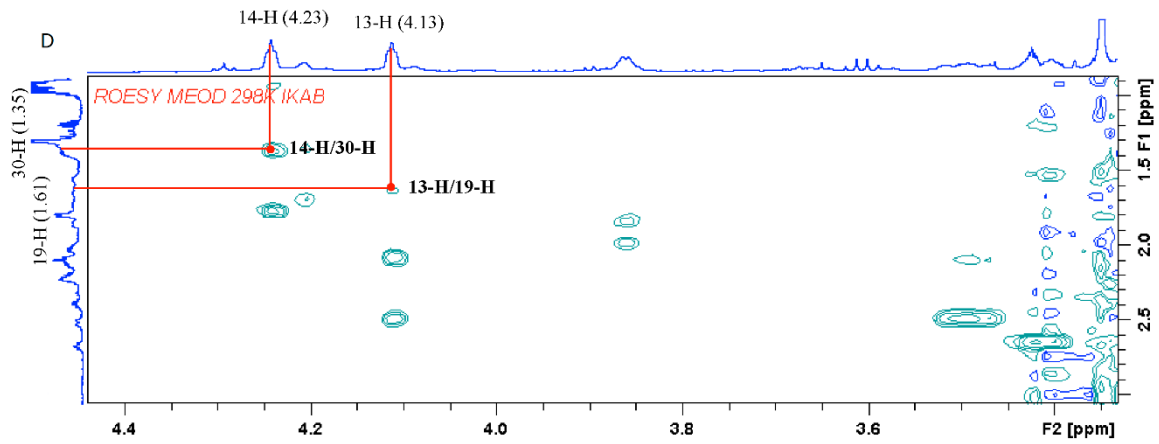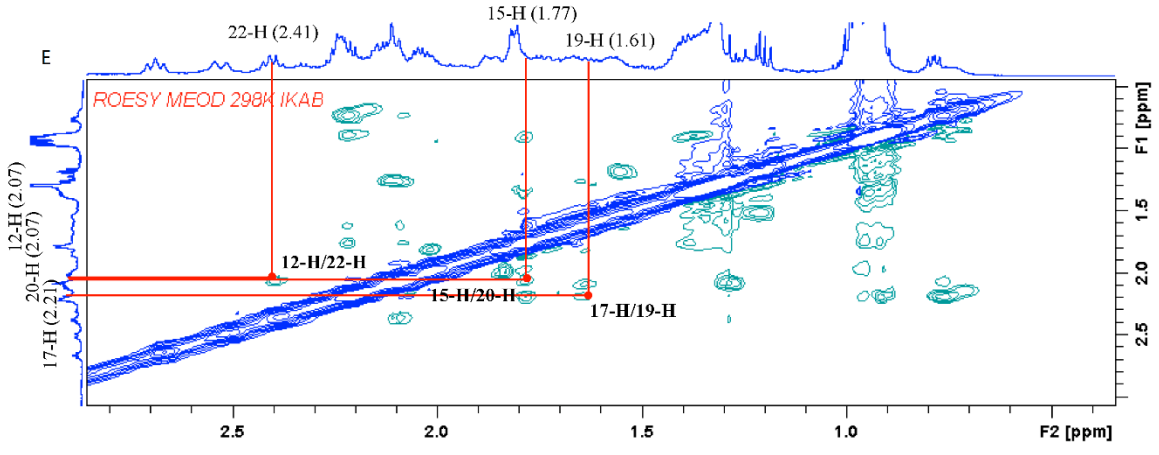

Supplement: srep40689-s1.pdf [file srep40689-s1.pdf]
